# Supplementary material for: Cohort profile: the Australian Longitudinal Study of Adults with Autism (ALSAA)
Source: PubMed Central journal article supplement — BMJ Open. 2019 Dec 4;9(12):e030798. doi: 10.1136/bmjopen-2019-030798 (PMC6924702; doi:10.1136/bmjopen-2019-030798), 2019-12-04
Supplement: bmjopen-2019-030798.draft_revisions.pdf [file bmjopen-2019-030798.draft_revisions.pdf]

# BMJ Open

BMJ Open is committed to open peer review. As part of this commitment we make the peer review history of every article we publish publicly available.

When an article is published we post the peer reviewers' comments and the authors' responses online. We also post the versions of the paper that were used during peer review. These are the versions that the peer review comments apply to.

The versions of the paper that follow are the versions that were submitted during the peer review process. They are not the versions of record or the final published versions. They should not be cited or distributed as the published version of this manuscript.

BMJ Open is an open access journal and the full, final, typeset and author-corrected version of record of the manuscript is available on our site with no access controls, subscription charges or pay-per-view fees (<http://bmjopen.bmj.com>).

If you have any questions on BMJ Open's open peer review process please email [info.bmjopen@bmj.com](mailto:info.bmjopen@bmj.com)

# BMJ Open

## Cohort profile: The Australian Longitudinal Study of Adults with Autism (ALSAA)

|                               |                                                                                                                                                                                                                                                                                                                                                                                                                                                                                                                                                                                                                                                                                                                                                                                                                                                                                                                                                                                                                                                                                                                                                                                                                                                                                                                                                                                                                                                                                                                                                                                                                                                                                                                |
|-------------------------------|----------------------------------------------------------------------------------------------------------------------------------------------------------------------------------------------------------------------------------------------------------------------------------------------------------------------------------------------------------------------------------------------------------------------------------------------------------------------------------------------------------------------------------------------------------------------------------------------------------------------------------------------------------------------------------------------------------------------------------------------------------------------------------------------------------------------------------------------------------------------------------------------------------------------------------------------------------------------------------------------------------------------------------------------------------------------------------------------------------------------------------------------------------------------------------------------------------------------------------------------------------------------------------------------------------------------------------------------------------------------------------------------------------------------------------------------------------------------------------------------------------------------------------------------------------------------------------------------------------------------------------------------------------------------------------------------------------------|
| Journal:                      | <i>BMJ Open</i>                                                                                                                                                                                                                                                                                                                                                                                                                                                                                                                                                                                                                                                                                                                                                                                                                                                                                                                                                                                                                                                                                                                                                                                                                                                                                                                                                                                                                                                                                                                                                                                                                                                                                                |
| Manuscript ID                 | bmjopen-2019-030798                                                                                                                                                                                                                                                                                                                                                                                                                                                                                                                                                                                                                                                                                                                                                                                                                                                                                                                                                                                                                                                                                                                                                                                                                                                                                                                                                                                                                                                                                                                                                                                                                                                                                            |
| Article Type:                 | Cohort profile                                                                                                                                                                                                                                                                                                                                                                                                                                                                                                                                                                                                                                                                                                                                                                                                                                                                                                                                                                                                                                                                                                                                                                                                                                                                                                                                                                                                                                                                                                                                                                                                                                                                                                 |
| Date Submitted by the Author: | 02-Apr-2019                                                                                                                                                                                                                                                                                                                                                                                                                                                                                                                                                                                                                                                                                                                                                                                                                                                                                                                                                                                                                                                                                                                                                                                                                                                                                                                                                                                                                                                                                                                                                                                                                                                                                                    |
| Complete List of Authors:     | <p>Arnold, Samuel; UNSW, Department of Developmental Disability Neuropsychiatry (3DN); Autism CRC</p> <p>Foley, Kitty-Rose; Southern Cross University - Gold Coast Campus, School of Health and Human Sciences; Autism CRC</p> <p>Hwang, Ye In; UNSW, Department of Developmental Disability Neuropsychiatry (3DN); Autism CRC</p> <p>Richdale, Amanda; La Trobe University, Olga Tennison Autism Research Centre, School of Psychology and Public Health; Autism CRC</p> <p>Uljarevic, Mirko ; Stanford University, Stanford Autism Center, Division of Child and Adolescent Psychiatry, Department of Psychiatry and Behavioral Sciences, School of Medicine; La Trobe University, Olga Tennison Autism Research Centre, School of Psychology and Public Health</p> <p>Lawson, Lauren; La Trobe University, Olga Tennison Autism Research Centre, School of Psychology and Public Health; Autism CRC</p> <p>Cai, Ru; La Trobe University, Olga Tennison Autism Research Centre, School of Psychology and Public Health; Autism CRC</p> <p>Falkmer, Torbjorn; Curtin University, School of Occupational Therapy, Social Work and Speech Pathology; Autism CRC</p> <p>Falkmer, Marita; Curtin University, School of Occupational Therapy, Social Work and Speech Pathology; Autism CRC</p> <p>Lennox, Nick; University of Queensland, Australia, Queensland Centre for Intellectual and Developmental Disability, Mater Research Institute - UQ; Autism CRC</p> <p>Urbanowicz, Anna; RMIT University, Health, Society &amp; Medicine Research Program, Social and Global Studies Centre; Autism CRC</p> <p>Trollor, Julian; UNSW, Department of Developmental Disability Neuropsychiatry (3DN); Autism CRC</p> |
| Keywords:                     | Autism, Longitudinal, Adult                                                                                                                                                                                                                                                                                                                                                                                                                                                                                                                                                                                                                                                                                                                                                                                                                                                                                                                                                                                                                                                                                                                                                                                                                                                                                                                                                                                                                                                                                                                                                                                                                                                                                    |
|                               |                                                                                                                                                                                                                                                                                                                                                                                                                                                                                                                                                                                                                                                                                                                                                                                                                                                                                                                                                                                                                                                                                                                                                                                                                                                                                                                                                                                                                                                                                                                                                                                                                                                                                                                |

SCHOLARONE™  
Manuscripts

## Title

Cohort profile: The Australian Longitudinal Study of Adults with Autism (ALSAA)

## Author Names and Affiliations

Samuel R. C. Arnold<sup>\*a,b</sup> <samuel.arnold@unsw.edu.au>

Kitty-Rose Foley<sup>\*b,c</sup> <Kitty-Rose.Foley@scu.edu.au>

Ye In (Jane) Hwang<sup>a,b</sup> <jane.hwang@unsw.edu.au>

Amanda L. Richdale<sup>b,d</sup> <A.Richdale@latrobe.edu.au>

Mirko Uljarevic<sup>e,d,b</sup> <mirkoulj@stanford.edu>

Lauren P. Lawson<sup>b,d</sup> <L.Lawson@latrobe.edu.au>

Ru Ying Cai<sup>b,d</sup> <R.Cai@latrobe.edu.au>

Torbjorn Falkmer<sup>b,f</sup> <T.Falkmer@curtin.edu.au>

Marita Falkmer<sup>b,f,g</sup> <Marita.Falkmer@curtin.edu.au>

Nick Lennox<sup>b,h</sup> <n.lennox@uq.edu.au>

Anna Urbanowicz<sup>b,h,i</sup> <a.urbanowicz@rmit.edu.au>

Julian N. Trollor<sup>+a,b</sup> <J.Trollor@unsw.edu.au>

## Affiliations

- a- Department of Developmental Disability Neuropsychiatry (3DN), UNSW Sydney, New South Wales, Australia
- b- Cooperative Research Centre for Living with Autism (Autism CRC), Brisbane, Queensland, Australia
- c- School of Health and Human Sciences, Southern Cross University, Gold Coast, Bilinga, Queensland, Australia
- d- Olga Tennison Autism Research Centre, School of Psychology and Public Health, La Trobe University, Bundoora, Victoria, Australia
- e- Stanford Autism Center, Division of Child and Adolescent Psychiatry, Department of Psychiatry and Behavioral Sciences, School of Medicine, Stanford University.

- 1  
2  
3 f- School of Occupational Therapy, Social Work and Speech Pathology, Curtin  
4 University, Perth, Western Australia, Australia  
5  
6 g- School of Education and Communication, CHILD Programme, Institution of  
7 Disability Research, Jonkoping University, Jonkoping, Sweden  
8  
9  
10 h- Queensland Centre for Intellectual and Developmental Disability, Mater Research  
11 Institute - UQ, The University of Queensland, South Brisbane, Queensland, Australia  
12  
13 i- Health, Society & Medicine Research Program, Social and Global Studies Centre,  
14 RMIT University  
15  
16

17 \*Joint first author

18  
19 +Corresponding author  
20  
21  
22  
23  
24  
25

26 Correspondence concerning this article should be addressed to Prof. Julian Trollor,  
27 Department of Developmental Disability Neuropsychiatry (3DN), 34 Botany St, UNSW  
28 Sydney, 2052, New South Wales, Australia. Telephone: +61-2-9931-9160. Email:  
29 [j.trollor@unsw.edu.au](mailto:j.trollor@unsw.edu.au)  
30  
31  
32  
33  
34  
35  
36  
37  
38  
39  
40  
41  
42  
43  
44  
45  
46  
47  
48  
49  
50  
51  
52  
53  
54  
55  
56  
57  
58  
59  
60

## Abstract (300 Words)

### *Purpose*

There is a significant knowledge gap regarding the lives of adults on the autism spectrum. Some literature suggests significant health and mental health inequalities for autistic adults, yet there is a lack of comprehensive longitudinal studies exploring risk factors. Further, most research does not include the perspective of autistic adults in its conduct or design. Here we describe the baseline characteristics and inclusive research approach of a nationwide longitudinal study.

### *Participants*

The Autism CRC's ALSAA is a questionnaire-based longitudinal study of autistic adults (25+ years old) with follow-up at 2-year intervals. Autistic advisors were involved in each stage of research apart from data analysis. Three questionnaires were developed: self-report, informant report, and carers.

### *Findings to date*

An inclusive research protocol was developed and agreed with autistic advisors. Baseline data were collected from 295 autistic adults ( $M=41.8$  years,  $SD=12.0$ ), 146 comparison participants, and 102 carers. Majority of autistic participants (90%) had been diagnosed in adulthood ( $M=35.3$  years,  $SD=15.1$ ). When compared to controls, autistic adults scored higher on self-report measures of current depression and anxiety. Participant comments informed on-going data gathering. Participants commented on questionnaire length, difficulty with literal interpretation of forced response items, and expressed gratitude for research in this area.

### *Future plans*

1  
2  
3 A large comprehensive dataset relating to autistic adults and their carers has been gathered,  
4  
5 creating a good platform for longitudinal follow-up and collaborative research. Baseline data  
6  
7 confirms poorer mental health of autistic adults. The ALSAA demonstrates a working  
8  
9 approach to inclusive research.  
10  
11  
12  
13  
14  
15  
16  
17  
18  
19  
20  
21  
22  
23  
24  
25  
26  
27  
28  
29  
30  
31  
32  
33  
34  
35  
36  
37  
38  
39  
40  
41  
42  
43  
44  
45  
46  
47  
48  
49  
50  
51  
52  
53  
54  
55  
56  
57  
58  
59  
60

For peer review only

### Strengths and limitations of this study

- Autism related research efforts and funding has focused on the period from infancy to mid childhood, this research focuses on autistic adults and their carers.
- The ALSAA uses an inclusive research approach to gather a comprehensive range of measures addressing identified research priorities.
- A large proportion of autistic (50%,  $n=295$ ) and non-autistic (80%,  $n=146$ ) females have participated in Time 1 data gathering.
- Participants self-report their autism diagnosis, and a subsample ( $n=32$ ) are not yet formally diagnosed.
- The ALSAA is a unique resource for exploring multiple research questions regarding the lives of Australian autistic adults.

## Introduction

Although autism is a lifelong condition, most autism related research efforts and funding has focused on the period from infancy to mid childhood<sup>1</sup>. The best available evidence suggests an adult population prevalence of at least 1.1%<sup>2</sup>. It is likely that autism is under-recognized or under-diagnosed in adults<sup>3,4</sup>, particularly in women without intellectual disability<sup>2,5</sup>.

Although an emerging body of research explores outcomes and support needs of autistic individuals beyond childhood and adolescence, studies including autistic adults remain frequently focused on younger adults<sup>6-8</sup>. This is reflected in recent commentary from an autistic researcher; “We know virtually nothing about what happens to us, autistic people, physically, cognitively, emotionally and socially as we pass through middle and older age”<sup>9</sup>(p515).

The growing body of evidence suggests higher rates of physical and mental health conditions, increased mortality and higher rates of intellectual disability than in the general population<sup>10</sup>. Autistic adults have higher prevalence of chronic medical conditions, including conditions such as stroke, vision and hearing impairments, and Parkinson’s disease<sup>11-14</sup>. These outcomes are experienced by many autistic adults regardless of intellectual functioning<sup>7</sup>. It has been reported that between 25%-84% of autistic adults have a diagnosed mental health condition, with depression and anxiety the most commonly reported conditions<sup>15-19</sup>. Autistic adults have higher rates of suicide<sup>16,20</sup>, increased mortality and reduced life expectancy<sup>21</sup>. Despite widespread acknowledgement of the comorbidity between autism and intellectual disability, prevalence estimates of intellectual disability in autism and vice versa have been inconsistent<sup>22</sup>. Earlier studies report that between 40 to 70% of those with autism also have an intellectual disability<sup>23-25</sup> though a more recent study reports fewer adults on the autism spectrum as having intellectual disability<sup>2</sup>.



1  
2  
3 Studies investigating outcomes related to daily activities and participation are also scarce<sup>26</sup>.  
4  
5 Available studies report low employment rates<sup>27</sup>, low community inclusion and limited social  
6  
7 relationships for autistic adults<sup>28-32</sup>. A few studies have suggested that factors such as low  
8  
9 childhood IQ, autism severity, psychopathology, social and language development, and  
10  
11 access to services and intervention programs may be determinates of such outcomes <sup>28, 33</sup>;  
12  
13 however, much remains to be understood about the sources of variability in these outcomes.  
14  
15

16  
17  
18 In general, much of the research remains limited by cross-sectional designs, mixed groups  
19  
20 with and without intellectual disability, and a focus on adults aged under 40 <sup>7, 33-35</sup>.  
21

22  
23 Longitudinal studies are crucial for exploring changing requirements over time and to inform  
24  
25 services how best to understand the health and wellbeing of autistic adults<sup>9, 36</sup>. Whilst most  
26  
27 studies have focused on one aspect of life or outcomes, such as physical or mental health  
28  
29 comorbidities<sup>12, 15, 37</sup> or quality of life<sup>29, 38</sup>, very few comprehensive evaluations of health,  
30  
31 wellbeing and participation have been conducted<sup>33</sup>. Further, research funding does not match  
32  
33 priorities identified by autistic adults, which include research on public services, improving  
34  
35 life skills and the future for autistic adults<sup>39</sup>.  
36  
37

38  
39 The majority of existing autism research is also limited by a lack of inclusive research  
40  
41 practices. There is a small but growing body of research on inclusive practices and co-  
42  
43 production in disability research with increasing examples in the autism field<sup>40-42</sup>. In  
44  
45 principle, inclusive research must “address issues that really matter” to people with disability,  
46  
47 “must access and represent their views and experiences” and people “need to be treated with  
48  
49 respect by the research community”<sup>43(p16)</sup>. Inclusive research encompasses a variety of  
50  
51 approaches, from including the individuals with the disability as advisors or consultants, to  
52  
53 working alongside academic researchers, or initiating or conducting the project as researchers  
54  
55 themselves<sup>44</sup>. Due to a history of mistrust between researchers and autism self-advocacy  
56  
57 groups, inclusive methods are especially important in research involving adults on the  
58  
59  
60

1  
2  
3 spectrum<sup>45</sup>. Inclusive approaches ensure scientific findings are meaningful to the autism  
4  
5 community and sensitive to the lived experiences of individuals on the spectrum<sup>46, 47</sup>.  
6  
7

8  
9 The Cooperative Research Centre for Living with Autism (Autism CRC) Australian  
10  
11 Longitudinal Study of Adults with Autism (ALSAA) is Australia's first national longitudinal  
12  
13 study involving autistic adults aged 25 years and older. The ALSAA will contribute needed  
14  
15 longitudinal data across a range of health, functioning and participation domains. Data  
16  
17 gathered aligns with the research gaps identified above, and the priorities identified by  
18  
19 autistic adults<sup>48</sup>. In comparison to current international longitudinal studies of autistic  
20  
21 adults<sup>49-51</sup> the ALSAA gathers a wider range of data points using standardised measures,  
22  
23 gathers data from a community comparison group, and importantly included autistic adults in  
24  
25 study design from the early stages of the project. The ALSAA will contribute to the  
26  
27 validation of several standardised measures for this population. Importantly, the ALSAA  
28  
29 gathers data specific to the unique context and service systems within Australia, pertinent  
30  
31 given the recent introduction of the National Disability Insurance Scheme (NDIS) and the  
32  
33 considerable differences in approaches to healthcare and disability across countries. The  
34  
35 ALSAA primarily aims to identify and comprehensively describe the profiles of Australian  
36  
37 autistic adults and to compare them to a control group. The aims of this paper are to describe  
38  
39 the methodological processes and the inclusive protocol adopted in the ALSAA, as well as to  
40  
41 present participant characteristics and feedback from the baseline data collection.  
42  
43  
44  
45  
46  
47

## 48 **Cohort Description**

### 49 *Design*

50  
51  
52 The ALSAA is a questionnaire-based, prospective, longitudinal cohort study with a planned  
53  
54 2-year follow-up. Initial design and development of the ALSAA occurred in collaboration  
55  
56 with researchers and clinical health professionals across Australia, including close  
57  
58  
59  
60

1  
2  
3 collaboration with the Autism CRC longitudinal Study of Australian School Leavers with  
4 Autism (SASLA)<sup>52</sup>. Brief consultation also occurred with international experts and  
5  
6 researchers conducting similar longitudinal studies. Additionally, preliminary work on factors  
7  
8 influencing the research participation of autistic adults<sup>53</sup> influenced the ALSAA design,  
9  
10 including ensuring opportunities for participants to clarify questions, receive regular study  
11  
12 newsletters, and space for participants to provide explanations regarding their responses.  
13  
14

15  
16  
17 The ALSAA was developed with input from a research advisory network, consisting of  
18  
19 autistic adults and family members/carers of autistic adults who helped develop the surveys  
20  
21 to ensure the questions were relevant, accessible and valid. The ALSAA Inclusive Research  
22  
23 Protocol was developed based on the principles of inclusive research<sup>54</sup>, the Autism CRC  
24  
25 report *Inclusive Research Practice Guides and Checklists for Autism Research*<sup>55</sup>, and  
26  
27 procedures similar to those employed by Nicolaidis and colleagues<sup>56</sup> (see Table 1). Since the  
28  
29 commencement of the ALSAA, this protocol has been reviewed by seven of the autistic  
30  
31 advisors and one carer advisor and has guided baseline outputs and the 2-year follow-up  
32  
33 design. Specifically, in the design stage of the ALSAA, members of the advisory network  
34  
35 were asked to identify ambiguous or inappropriate language, formatting issues and measures  
36  
37 which they thought may be interpreted inappropriately or differently due to poor clarity or  
38  
39 wording. Advisors have also provided feedback on ongoing research outputs.  
40  
41  
42  
43  
44  
45

46 **[Insert Table 1 here]**  
47

### 48 *Participants*

49  
50  
51 There are three participant groups in the ALSAA: autistic adults, non-autistic general  
52  
53 community comparison controls, and carers of autistic adults. Inclusion criteria required the  
54  
55 control and autistic participants to be aged 25 years or older, live in Australia and have  
56  
57 sufficient English literacy skills to complete the survey, determined during a screening phone  
58  
59  
60

1  
2  
3 call or online expression of interest (EOI). If an autistic individual was unable or unwilling to  
4 self-report, they were given the option to ask an informant to complete an informant version  
5 of the survey on their behalf. People with intellectual disability could complete the self-report  
6 survey with support or participate via an informant respondent.  
7  
8  
9  
10

11  
12  
13 Informant respondents and carers needed to be 18 years or older, have sufficient English  
14 literacy skills, live in Australia and be able to report on the life of the autistic person. The  
15 content of the informant survey is slightly different to the self-report survey (see Table 2) due  
16 to some measures, such as the Patient Health Questionnaire-9 (PHQ-9)<sup>57</sup>, having no  
17 informant version available. Carers, including family members and support people for the  
18 ALSAA, were defined as people who provided unpaid care and support to either a family  
19 member (including spouse) or friend who in on the autism spectrum. This is based on the  
20 widely accepted definition proposed by Carers Australia  
21 (<http://www.carersaustralia.com.au/about-carers/>).  
22  
23  
24  
25  
26  
27  
28  
29  
30  
31  
32  
33

### 34 *Survey*

35  
36  
37 Three versions of the survey were developed: 1) self-report, for autistic adults and non-  
38 autistic controls, 2) informant, for carers/support people to complete about the autistic person  
39 who is unable to, or does not want to self-complete, and 3) carer survey for carers/support  
40 people/family members to complete about their own health and wellbeing. Surveys could be  
41 completed via a paper copy or online. The paper copy was also available in large print. The  
42 surveys involved a comprehensive range of measures (see Table 2). In selecting measures,  
43 preference was given to measures that had established validity with people on the spectrum  
44 and to those deemed suitable by the autistic advisors.  
45  
46  
47  
48  
49  
50  
51  
52  
53  
54  
55  
56

57 **[Insert Table 2 here]**  
58  
59  
60

1  
2  
3 Each survey also contained closing feedback items, asking if any questions were confusing,  
4 difficult, or upsetting, and any additional topics that should be included. It also asked how  
5 long the survey took to complete (open-ended response), and an overall satisfaction with the  
6 survey rated on a 5-point Likert scale. A final item asked for any further feedback.  
7  
8  
9

### 10 11 12 13 *Procedure*

#### 14 15 16 *Piloting*

17  
18  
19 Each version of the survey was piloted by a small number of people on the spectrum, autistic  
20 advisors and/or carers. Volunteers received two copies, one copy to complete, with data  
21 recorded where possible in the ALSAA dataset, and the other for their feedback.  
22  
23

24  
25  
26 Considerable changes to each version of the survey were undertaken in response to feedback  
27 from the autistic advisors and volunteers, including removing the Communication Checklist –  
28 Adult<sup>58</sup>, formatting changes and changes to item wordings where the item did not belong to  
29 an existing standardised tool.  
30  
31  
32  
33

#### 34 35 36 *Recruitment and Follow-up*

37  
38  
39 A recruitment target of 160 autistic adults was set to allow for regression analyses using  
40 multiple predictor variables. Participants were recruited via advertisements through autism-  
41 specific organisations, disability organisations, autism self-advocacy groups, employment  
42 services, universities, Technical and Further Education (TAFE) institutes, psychology and  
43 allied health private practices, carer organisations, and online autism communities. In  
44 attempts to gather a sample more closely matched to Australian population estimates<sup>59</sup>,  
45 additional recruitment activities targeted adults on the spectrum with intellectual disability,  
46 and males without autism. General community members, autistic adults and carers of autistic  
47 adults who were willing to participate in the ALSAA contacted the research team based at  
48  
49  
50  
51  
52  
53  
54  
55  
56  
57  
58  
59  
60

1  
2  
3 The University of New South Wales (UNSW Sydney) via telephone, email or through  
4 completing a short online EOI. After eligibility screening, their details were added to the  
5 participant database and they were mailed a paper copy or emailed a link to their survey  
6 depending on their preference.  
7  
8  
9  
10  
11  
12

13 Due to a high number of responses and advice from autistic advisors, participants who self-  
14 identified as being autistic, but did not have a formal diagnosis, representing the hidden  
15 population and ‘lost generation’<sup>3</sup> of autistic adults, were also recruited. Formally diagnosed  
16 participants were asked to provide details of their diagnosis, year of diagnosis, and the  
17 discipline and name of the practitioner(s) who diagnosed them. AQ-short cut-off scores (>65,  
18 sensitivity .97, specificity .82)<sup>60</sup> also support diagnostic status. At the planned two-year  
19 average Time 2 follow-up copies of participants’ diagnostic reports will be requested. From  
20 November 2017 through 2019 participants are being recontacted using contact details  
21 provided and considering their communication preferences that were recorded.  
22  
23  
24  
25  
26  
27  
28  
29  
30  
31  
32

### 33 34 *Ethical Considerations*

35  
36  
37 Participants were supplied with the appropriate Participant Information Statement and  
38 Consent Form (PISCF). For the online survey, participants were asked to confirm their  
39 consent at commencement. Consent was inferred from participants who completed and  
40 returned paper copies of the survey, as outlined in their PISCF. In the case where the autistic  
41 adult had an intellectual disability a checklist for capacity to provide consent was used. This  
42 checklist was completed by the carer/next of kin; it was adapted from a checklist developed  
43 for use in the Study of Ageing in Intellectual Disability (SAGE)<sup>61</sup>. The study was approved  
44 by the Human Research Ethics Committee at UNSW Sydney, Australia (No. HC15001).  
45  
46  
47  
48  
49  
50  
51  
52  
53  
54  
55

### 56 57 *Data storage*

1  
2  
3 Online questionnaire data were entered directly by participants into Qualtrics Online Survey  
4  
5 Software (<https://www.qualtrics.com/>), whereas returned paper copy surveys were entered  
6  
7 into Qualtrics by a researcher or research assistant. Data from Qualtrics were stored on  
8  
9 password-protected UNSW Sydney servers. Recently, ethics approval for establishment of a  
10  
11 databank for the ALSAA data, to allow collaboration with external researchers has been  
12  
13  
14 obtained.

### 17 *Statistical analysis*

20  
21 STATA Statistical Analysis Software 14<sup>62</sup> and IBM SPSS Statistics 22<sup>63</sup> were used for  
22  
23 cleaning, coding, and statistical analyses. For the current manuscript, STATA was used to  
24  
25 obtain descriptive statistics regarding recruitment, participant feedback, and participant  
26  
27 characteristics. For describing this cohort profile, listwise deletion was used for specific  
28  
29 analyses when data were missing completely at random, after checking for difference in  
30  
31 demographics and AQ score for dropped participants where appropriate. Subsample sizes are  
32  
33 noted throughout.  
34  
35

### 37 *Recruitment statistics*

40  
41 Recruitment commenced in July 2015. At the close of Time 1 data gathering in November  
42  
43 2017, 345 autistic adults, 221 non-autistic adults, 185 carers, and 78 informants had  
44  
45 registered their interest in the study. Of these, 237 autistic adults, 130 non-autistic adults, 100  
46  
47 carers, and 42 informant reporters completed the entire survey. Overall, a total of 295 autistic  
48  
49 adults participated including all survey formats and partial survey completions. A small  
50  
51 proportion of participants were deemed ineligible during screening (see Table 3), generally  
52  
53 due to being under 25 years, not caring for an adult aged 25+ years old, or being located  
54  
55 outside of Australia. Participants were recorded as partial completions if at close of Time 1  
56  
57 their surveys contained the initial demographic items completed and some additional useable  
58  
59  
60

1  
2  
3 data. From available data there was no significant difference in gender,  $X^2(4, n=337) = 1.07$ ,  
4  
5  $p=.898$ , or approximate age [ $F(4, 4) = 2.04, p=.09$ ] based on survey commencement,  
6  
7 eligibility or completion status for the autistic adults.  
8  
9

10  
11 **[Insert Table 3 here]**  
12

13  
14 *Time taken to complete, and satisfaction with, the survey*  
15

16  
17 Participants reported varying times taken to complete the entire survey. Self-reporting autistic  
18  
19 participants reported between 20 minutes and 12 hours to complete with an average time of  
20  
21 156 minutes ( $n=164, SD=111$ ), though several responses ( $n=53$ ) were not easily convertible  
22  
23 to numeric values for analysis, for example “few days”, “no idea”, or no response to the item  
24  
25 ( $n=36$ ). Non-autistic, self-reporting participants reported a range of 20 minutes to 5 hours  
26  
27 with an average time of 106 minutes ( $n=98, SD=74$ ). This was significantly less than self-  
28  
29 reporting autistic adults despite their completing almost all the same measures and domains,  
30  
31  $t(260)=-4.94, p<.001$ . Carers took 75 minutes on average ( $n=81, SD=62$ ) and informant  
32  
33 responders took 103 minutes on average ( $n=27, SD=54$ ) to complete surveys. The majority of  
34  
35 participants (64%,  $n=482$ ) reported that they were satisfied or very satisfied with the survey;  
36  
37 few participants were dissatisfied (6%) (Figure 1). There was no association between time  
38  
39 taken to complete the self-report survey and level of satisfaction ( $n=262, r_s = .10, p=.09$ ), and  
40  
41 no difference in satisfaction based on survey type,  $X^2(9, n=482) = 11.2, p=.26$ .  
42  
43  
44  
45  
46  
47

48 **[Insert Figure 1 here]**  
49

50  
51 The most common negative feedback related to the length of surveys, or to difficulty with  
52  
53 literal interpretations of forced response items where participants felt the options provided did  
54  
55 not match their circumstances. Several participants provided feedback that they were grateful  
56  
57 for research in this area. Additional topics of interest were suggested, as well as the potential  
58  
59  
60



1  
2  
3 removal of some questionnaires (e.g., the Brief COPE). Revision of items referring to social  
4 supports was suggested, as some participants found these upsetting.  
5  
6  
7

### 8 *Summary of participant characteristics*

9  
10  
11 The age of autistic participants ranged from 25 to 80 years, with a high proportion of females  
12 (50%,  $n=295$ ) across all autistic samples. Across all autistic participants 25% were married  
13 and 36% were living as a couple. Over half (57%,  $n=42$ ) of the informant report sample lived  
14 with their parents (see Table 4), in contrast to self-reporting autistic adults who most  
15 frequently lived as a couple (45%,  $n=295$ ) or alone (26%,  $n=295$ ). Self-reporting autistic  
16 adults did not differ to control participants on rural / remoteness according to Australian  
17 Statistical Geography Standard-Remoteness Area (ASGS-RA) classification,  $\chi^2(4, n=378) =$   
18 9.36,  $p=.05$  ( $n=21$  missing). They were more likely to have greater socioeconomic  
19 disadvantage according to the postcode-based Socioeconomic Index for Areas (SEIFA)  
20 decile,  $t(376)=2.96$ ,  $p<.01$  ( $n=21$  missing, NB. SEIFA / rurality not available for all  
21 postcodes), though were still above average compared to the Australian population. Time 2  
22 data gathering will seek to gather household income data to more accurately determine  
23 socioeconomic disadvantage.  
24  
25  
26  
27  
28  
29  
30  
31  
32  
33  
34  
35  
36  
37  
38  
39  
40

41  
42 As shown in Table 5, the majority (97%,  $n=295$ ) of all autistic participants met the AQ-Short  
43 cut-off for identifying autism, compared to 30% ( $n=60$ ) of biologically related carers and  
44 22% ( $n=137$ ) of non-autistic control participants. Asperger's syndrome was the most  
45 frequently reported formal diagnosis. Self-report, formally diagnosed autistic participants on  
46 average were diagnosed 6.9 years prior to survey completion, and the majority (90%;  $n=217$ ,  
47 4 missing) received their diagnosis in adulthood. A preliminary analysis of gender differences  
48 for self-reporting autistic adults was also conducted. In comparison to males, self-reporting  
49 formally diagnosed females did not differ significantly on age of diagnosis  $t(192)=.39$ ,  $p=.70$   
50  
51  
52  
53  
54  
55  
56  
57  
58  
59  
60

( $n=4$  missing). Comparing males with females, including non-diagnosed autistic adults, there was no difference in number of individuals currently married or in a defacto relationship,  $X^2(1, n=241) = .8, p=.38$ , or in their educational status,  $X^2(2, n=241) = 4.66, p=.10$ . Females were significantly different regarding employment status  $X^2(4, n=241) = 18.77, p=.001$ , though only relating to the number providing homecare ( $n=19$  female vs.  $n=1$  male).

In the non-autistic control sample, participant ages ranged from 25 to 79 years, with a high proportion (80%,  $n=146$ ) of females. The majority lived as a couple (72%) and were married (62%). The control sample was significantly different to the self-reporting autistic adults (with and without a formal diagnosis) on several demographics including gender,  $X^2(2, n=399) = 26.5, p<.001$ , living situation,  $X^2(5, n=399) = 33.2, p<.001$ , marital status,  $X^2(8, n=398) = 47.1, p<.001$  ( $n=1$  missing), employment status,  $X^2(6, n=367) = 18.3, p=.005$  ( $n=32$  missing), and higher education status,  $X^2(2, n=399) = 22.4, p<.001$ . The control sample was also significantly less likely to meet the PHQ-9 cut-off for depression,  $X^2(1, n=354) = 54.9, p<.001$  ( $n=45$  missing), less likely meet the DSM5 GAD-A cut-off<sup>64</sup> for anxiety,  $X^2(1, n=366) = 67.8, p<.001$  ( $n=33$  missing), and less likely to have a history of psychiatric illness,  $X^2(1, n=384) = 82.1, p<.001$  ( $n=15$  missing), compared to self-reporting autistic adults. There were no significant differences for self-reporting autistic adults missing data on the PHQ-9 or DSM5 GAD-A based on age, gender or AQ score.

As shown in Table 6, the majority (43%;  $n=98, 4$  missing) of carers were mothers of an autistic adult, followed by partners or spouses (23%). Carers' ages ranged from 21 to 78 years. The majority were female (83%,  $n=102$ ), married (66%), and living as a couple (75%). Carers spent an average 63.4 ( $SD=57.80, n=92$ ) hours per week with the adult with autism, and the average age of the autistic adult cared for was 37.5 years (range 25-96 years,  $SD=13.21$ ). The majority of carer participants (76%,  $n=102$ ) are linked to a self-report or informant-report responses.

1  
2  
3 [insert Table 4 here]

4 [insert Table 5 here]

5 [insert Table 6 here]

## Findings to date

15 Using an inclusive research approach, the ALSAA has collected a detailed profile of the  
16 physical and mental health, productivity, wellbeing and health service use of autistic adults  
17 aged 25+ years, and their carers, living in Australia. There were high numbers of recruitment  
18 responses across the four Time 1 survey populations (autistic and control adult self-report,  
19 informant report on autistic adults, carer self-report). The ALSAA Time 1 data has been used  
20 in several studies of psychotropic medication use<sup>65</sup>, leisure participation<sup>66</sup>, ageing well<sup>67</sup>,  
21 loneliness<sup>68</sup> and employment<sup>69</sup>. ALSAA and SASLA pooled data has been used to explore  
22 cognitive reappraisal<sup>70</sup>, suicidal ideation<sup>71</sup>, psychometric scale validation<sup>72</sup>, anxiety and  
23 depression<sup>73</sup>. Several other outputs are in development.

### *Participant characteristics*

36 A large number of females on the spectrum ( $n=150$ ) have participated in the ALSAA. This  
37 will provide an opportunity to explore the different expression of autism characteristics in  
38 females without intellectual disability<sup>5, 74</sup>. Similar to findings in other studies<sup>10, 31</sup>, self-  
39 reporting autistic adults had high rates of depression (52%), anxiety (55%), and a frequent  
40 history of psychiatric diagnosis (89%), significantly more than the control sample. They were  
41 less likely to be employed and less likely to have a university education compared with the  
42 control sample.

### *Questionnaire feedback and completion*

1  
2  
3 The length of the surveys may have led to some participants not completing following  
4 registration, or to missing data or only partial completions. Longer survey length has been  
5 linked to lower participation and completion of web-based surveys<sup>75, 76</sup>. Despite emphasising  
6 the ability to complete over several sessions, some participants commented that the survey  
7 was “too long”. In contrast, survey length was not identified as an issue during pilot testing,  
8 time to complete was not related to survey satisfaction, and some participants appreciated the  
9 comprehensive nature of the surveys. Suggestions made in questionnaire feedback will be  
10 incorporated in the design of the 2-year follow up. Follow-up design aims to reduce  
11 assessment burden by reducing overall survey length and where appropriate pre-filling  
12 repeated measures such as medical history. Additional areas of interest to the community will  
13 be explored including bullying, relationships and terms used to describe individuals with an  
14 autism spectrum diagnosis.

### 31 **Strengths and limitations**

32  
33 An important strength of the study was the inclusive research approach using autistic  
34 advisors. Frequently missing from autism research and other longitudinal studies, an  
35 inclusive research protocol was developed for the ALSAA in consultation with autistic  
36 advisors (see Table 1) and applied across all stages of the research process apart from the  
37 analysis. Inclusive research has been found to increase the likelihood that findings are  
38 translatable to the real world and focused on areas of need from community perspectives<sup>43</sup>.  
39 Best-practise processes of conducting inclusive research with autistic adults are not well  
40 known, though more resources are becoming available<sup>77</sup> The ALSAA has engaged peer  
41 researchers in some future outputs. An additional strength of the ALSAA design is its  
42 consideration and partial overlap with several other national and international studies, for  
43 example overlap with the Autism CRC SASLA longitudinal study allows for a lifespan  
44 approach to be taken including data from late adolescence<sup>70</sup>.

1  
2  
3  
4  
5  
6 The ALSAA baseline sample is reflective of the convenience sampling methodology used.  
7  
8 Participants would appear non-representative of the Australian autism population given  
9  
10 approximate postcode-based above average socioeconomic status, a large female gender bias  
11  
12 for both autistic adults and controls, and that the majority of the autistic sample does not have  
13  
14 an intellectual disability. Earlier epidemiological estimates of autism<sup>23</sup> would suggest a larger  
15  
16 proportion of people with a diagnosis of autism and intellectual disability and a much higher  
17  
18 male to female ratio, though recent work questions these assumptions<sup>2, 78</sup>. Self-selection in  
19  
20 online surveys can lead to a female gender bias<sup>76</sup>, as also has been noted in other online  
21  
22 autism research<sup>79-81</sup>. Commonly reported as a 4 to 1 male bias<sup>82</sup>, there is suggestion the true  
23  
24 autism gender ratio may be closer to 3 to 1<sup>78</sup> or lower<sup>74</sup> as females with autism are at a higher  
25  
26 risk of being underdiagnosed<sup>3</sup>.  
27  
28  
29  
30  
31

32 The majority of the current autistic sample does not have an intellectual disability. Significant  
33  
34 barriers exist for people with intellectual disability to participate in a questionnaire-based  
35  
36 study<sup>83</sup>. An alternative to directly gathering information from adults on the spectrum with  
37  
38 intellectual disability is the participation via an informant respondent. Although an informant  
39  
40 respondent survey was made available for the ALSAA, and despite targeted recruitment  
41  
42 efforts, there was low participation of people with intellectual disability.  
43  
44  
45  
46

47 A final limitation is the self-report questionnaire format of the ALSAA, particularly in  
48  
49 relation to self-reported diagnosis of autism and comorbid conditions without clinical  
50  
51 reassessment. This is offset by gathering of additional questions relating to autism diagnosis,  
52  
53 including asking if the respondent has a diagnostic report, name and type of clinician  
54  
55 providing diagnosis, and AQ scores. These variables could be used to identify subsamples  
56  
57 with stronger evidence of definite diagnosis of autism for separate analysis where necessary.  
58  
59  
60

1  
2  
3 Further, diagnostic reports from participants will be gathered at follow-up to confirm  
4 diagnosis. Gathering data from adults without a formal diagnosis is potentially a strength,  
5 given the 'lost generation' of autistic adults<sup>3</sup>, significant barriers to diagnosis, and accuracy  
6 issues with gold standard autism assessment tools<sup>84</sup>; these participants could be overlooked in  
7 other studies though they represent an important hidden population group. The self-report  
8 format also prevents the quantification of participants' cognitive ability. The use of  
9 standardised mental health screening measures with clinical cut-offs gathers some  
10 information on co-occurring mental health conditions, though not as reliably as would be  
11 available via clinical interview. Conversely, community-based sampling and use of self-  
12 report questionnaires does allow for gathering a reasonably large sample, offsetting the risk  
13 of including people with incorrect diagnostic data with increased statistical power and the  
14 potential severity bias of clinical samples. Limitations and strengths of the ALSAA study  
15 design will largely depend on the specific research question being explored, with sufficient  
16 sample size and data points to partial-out subgroups and non-matched controls or to account  
17 for common method variance as needed.

### 37 38 *Implications*

39  
40  
41 There is a significant knowledge gap regarding the lives of autistic adults. The ALSAA has  
42 gathered a large comprehensive dataset relating to autistic adults and their carers, creating a  
43 platform for longitudinal follow-up and collaborative research. The ALSAA is an important  
44 resource for exploring multiple research questions regarding the lives of autistic adults.

45  
46 However, as with all longitudinal research caution is required in drawing firm conclusions  
47 from the ALSAA cohort in relation to the entire Australian autism population. Nevertheless,  
48 this cohort provides the first opportunity to explore longitudinal outcomes of Australian  
49 autistic adults. Having offline and informant versions of questionnaires, and questionnaires  
50  
51  
52  
53  
54  
55  
56  
57  
58  
59  
60

1  
2  
3 reviewed by autistic advisors, facilitates greater accessibility for participants on the spectrum  
4  
5 and their carers.  
6  
7

8 The ALSAA study demonstrates a working approach to inclusive research with autistic  
9  
10 advisors. The inclusive research protocol developed in this study provides a useful basis for  
11  
12 other research endeavours. Following this protocol, future outputs such as peer-reviewed  
13  
14 manuscripts, presentations and reports from the ALSAA will also be developed in  
15  
16 consultation with autistic advisors or autistic peer researchers. Input from autistic advisors  
17  
18 has already improved the quality and relevance of initial outputs<sup>65</sup>, identifying potential  
19  
20 alternative interpretations of findings based on lived experiences, and modifying the  
21  
22 methodology in one instance<sup>68</sup>.  
23  
24  
25  
26

27 Some measures used in the ALSAA have not yet been validated with autistic adult samples  
28  
29 (e.g., DSM5 GAD-A, Emotion Regulation Questionnaire, PHQ-15). The ALSAA provides  
30  
31 the opportunity to explore the validity of these commonly used measures”  
32  
33  
34

### 35 **Collaboration**

36  
37  
38 International studies involving autistic adults and utilising standardised measures are  
39  
40 underway in the United States, Netherlands and United Kingdom (e.g., SPARK  
41  
42 <http://sparkforautism.org>, AASPIRE <https://aaspire.org/>, the Netherlands Autism Register  
43  
44 <https://www.nederlandsautismeregister.nl> and the Adult Autism Spectrum Cohort-UK  
45  
46 <http://research.ncl.ac.uk/adultautismspectrum/>), though with less comprehensive ranges of  
47  
48 measures. During development of the ALSAA, consultation with international groups  
49  
50 occurred to ensure there were some synergies with these studies. Future international  
51  
52 comparisons will be possible, including pooling of data. This will allow for the creation of  
53  
54 much larger datasets and more in-depth understanding of life in adulthood for autistic people.  
55  
56  
57  
58  
59  
60

## Further details

### Contributors

Manuscript drafting was jointly led by SA and KF. All the authors had a role in contributing to the manuscript text.

### Data Sharing Statement

Processes to establish data banking and sharing procedures are currently being finalised.

Please email the corresponding author regarding queries.

### Ethics approval

The study was approved by the Human Research Ethics Committee at UNSW Sydney, Australia (No. HC15001).

### Acknowledgements

The authors also acknowledge the valuable contribution of the Research Advisory Network members Matthew Bennett, Bob Boyce, Jen Harland, Julianne Higgins, Gabriel Nakhel, Joanne Mahony, Andrea Michael, Cheryl Strangio, and Chris Tanner whose insight and recommendations shaped this work. We also gratefully acknowledge the cooperation and participation of all participants on the autism spectrum and their carers involved in this study.

### Funding



1  
2  
3 This work was supported by the Cooperative Research Centre for Living with Autism  
4  
5 (Autism CRC), established and supported under the Australian Government's Cooperative  
6  
7  
8 Research Centres Program.  
9  
10  
11  
12  
13

#### 14 **Conflict of Interest**

15  
16  
17 The authors have no conflict of interest to report.  
18  
19  
20  
21  
22  
23  
24  
25  
26  
27  
28  
29  
30  
31  
32  
33  
34  
35  
36  
37  
38  
39  
40  
41  
42  
43  
44  
45  
46  
47  
48  
49  
50  
51  
52  
53  
54  
55  
56  
57  
58  
59  
60

## References

1. Seltzer MM, Shattuck PT, Abbeduto L, Greenberg JS. Trajectory of development in adolescents and adults with autism. *Mental Retardation and Developmental Disabilities*. 2004;10:234-47.
2. Brugha TS, Spiers N, Bankart J, Cooper S-A, McManus S, Scott FJ, et al. Epidemiology of autism in adults across age groups and ability levels. *The British Journal of Psychiatry*. 2016 2016/12/01;209(6):498-503. en.
3. Lai M-C, Baron-Cohen S. Identifying the lost generation of adults with autism spectrum conditions. *The Lancet Psychiatry*. 2015 2015/11/01;2(11):1013-27.
4. Van Wijngaarden-Cremers PJM, van Eeten E, Groen WB, Van Deurzen PA, Oosterling IJ, Van der Gaag RJ. Gender and Age Differences in the Core Triad of Impairments in Autism Spectrum Disorders: A Systematic Review and Meta-analysis. *Journal of Autism and Developmental Disorders*. 2014 March 01;44(3):627-35.
5. Bargiela S, Steward R, Mandy W. The Experiences of Late-diagnosed Women with Autism Spectrum Conditions: An Investigation of the Female Autism Phenotype. *Journal of Autism and Developmental Disorders*. 2016 2016/10/01;46(10):3281-94. en.
6. Jang J, Matson JL, Adams HL, Konst MJ, Cervantes PE, Goldin RL. What are the ages of persons studied in autism research: A 20-year review. *Research in Autism Spectrum Disorders*. 2014;8(12):1756-60.
7. Howlin P, Moss P. Adults with autism spectrum disorders. *Canadian Journal of Psychiatry*. 2012;57(5):275-83.
8. Nicolaidis C. Autism in Adulthood: The New Home for Our Emerging Field. *Autism in Adulthood*. 2018;1(1):1-2.
9. Michael C. Why we need research about autism and ageing. *Autism*. 2016;20(5):515-6.
10. Howlin P, Magiati I. Autism spectrum disorder: outcomes in adulthood. *Current Opinion In Psychiatry*. 2017;30(2):69-76.
11. Cashin A, Buckley T, Trollor J, Lennox N. A scoping review of what is known of the physical health of adults with autism spectrum disorder. *Journal of Intellectual Disabilities*. 2016.
12. Croen LA, Zerbo O, Qian Y, Massolo M, Rich S, Sidney S, et al. The health status of adults on the autism spectrum. *Autism*. 2015;19(7):814-23.
13. Jones KB, Cottle K, Bakian A, Farley M, Bilder D, Coon H, et al. A description of medical conditions in adults with autism spectrum disorder: a follow-up of the 1980s Utah/UCLA autism epidemiologic study. *Autism*. 2016;5:551-61.
14. Weiss JA, Riosa PB. Thriving in youth with autism spectrum disorder and intellectual disability. *Journal of Autism and Developmental Disorders*. 2015;45:2474-86.
15. Buck TR, Viskochil J, Farley M, Coon H, McMahon WM, Morgan J, et al. Psychiatric comorbidity and medication use in adults with autism spectrum disorder. *Journal of Autism and Developmental Disorders*. 2014;44:3063-71.
16. Hedley D, Uljarević M, Wilmot M, Richdale A, Dissanayake C. Understanding depression and thoughts of self-harm in autism: A potential mechanism involving loneliness. *Research in Autism Spectrum Disorders*. 2018 2018/02/01;46:1-7.
17. Lever AG, Geurts HM. Psychiatric co-occurring symptoms and disorders in young, middle-aged, and older adults with autism spectrum disorders. *Journal of Autism and Developmental Disorders*. 2016;46:1916-30.
18. Matson JL, Williams LW. Depression and mood disorders among persons with Autism spectrum disorders. *Research in Developmental Disabilities*. 2014;35:2003-7.

19. Moss P, Howlin P, Savage S, Bolton P, Rutter M. Self and informant reports of mental health difficulties among adults with autism findings from a long-term follow-up study. *Autism*. 2015.
20. Hedley D, Uljarević M, Wilmot M, Richdale A, Dissanayake C. Brief Report: Social Support, Depression and Suicidal Ideation in Adults with Autism Spectrum Disorder. *Journal of Autism and Developmental Disorders*. 2017 November 01;47(11):3669-77.
21. Hirvikoski T, Mittendorfer-Rutz E, Boman M, Larsson H, Lichtenstein P, Bolte S. Premature mortality in autism spectrum disorder. *The British Journal of Psychiatry*. 2015.
22. Matson JL, Nebel-Schwalm N. Comorbid psychopathology with autism spectrum disorder in children: an overview. *Research in Developmental Disabilities*. 2007;28:341-52.
23. Fombonne E. Epidemiology surveys of autism and other pervasive developmental disorders: an update. *Journal of Autism and Developmental Disorders*. 2003;33(4):365-82.
24. LaMalfa G, Lassi G, Bertilli M, Salvani R, Placidi GF. Autism and intellectual disability: a study of prevalence on a sample of the Italian population. *Journal of Intellectual Disability Research*. 2004;48:262-7.
25. Matson JL, Shoemaker M. Intellectual disability and its relationship to autism spectrum disorders. *Research in Developmental Disabilities*. 2009;30:1107-14.
26. Howlin P, Arciuli J, Begeer S, Brock J, Clarke K, Costley D, et al. Research on adults with autism spectrum disorder: roundtable report. *Journal of Intellectual and Developmental Disability*. 2015;40(4):388-93.
27. Hedley D, Uljarevic M, Cameron L, Halder S, Richdale AL, Dissanayake C. Employment programmes and interventions targeting adults with autism spectrum disorder: a systematic review of the literature. *Autism*. 2016:1-13.
28. Gray KM, Piccin AK, C. M., Taffe J, Parmenter TR, Hofer S, Einfeld S, et al. Outcomes in young adulthood: are we achieving community participation and inclusion? *Journal of Intellectual Disability Research*. 2014;58(8):734-45.
29. Henninger NA, Taylor JL. Outcomes in adults with autism spectrum disorders: a historical perspective. *Autism*. 2013;17(1):103-16.
30. Howlin P, Moss P, Savage S, Rutter. Social outcomes in mid- to later adulthood among individuals diagnosed with autism and average nonverbal IQ as children. *Journal of American Academy of Child & Adolescent Psychiatry*. 2013;52(6):572-81.
31. Magiati I, Tay XW, Howlin P. Cognitive, language, social and behavioural outcomes in adults with autism spectrum disorders: a systematic review of longitudinal follow-up studies in adulthood. *Clinical Psychology Review*. 2014;34:73-86.
32. Marriage S, Wolverson A, Marriage K. Autism spectrum disorder grown up: A chart review of adult functioning. *Journal of the Canadian Academy of Child and Adolescent Psychiatry*. 2009;18(4):322.
33. Levy A, Perry A. Outcomes in adolescents and adults with autism: a review of the literature. *Research in Autism Spectrum Disorders*. 2011;5:1271-82.
34. Seltzer MM, Krauss MW, Shattuck PT, Orsmond GI, Swe A, Lord C. The symptoms of autism spectrum disorders in adolescence and adulthood. *Journal of Autism and Developmental Disorders*. 2003;33:565-81.
35. Shattuck PT, Selter MM, Greenberg JS, Orsmond GI, Bolt D, Kring S, et al. Change in autism symptoms and maladaptive behaviors in adolescents and adults with an autism spectrum disorder. *Journal of Autism and Developmental Disorders*. 2007;37:1735-47.
36. Happe F, Charlton RA. Aging in autism spectrum disorders: a mini-review. *Gerontology*. 2010;58:70-8.
37. Totsika V, Felce D, Kerr M, Hastings RP. Behaviour problems, psychiatric symptoms, and quality of life for older adults with intellectual disability with and without autism. *Journal of Autism and Developmental Disorders*. 2010;40:1171-8.

- 1
  - 2
  - 3
  - 4
  - 5
  - 6
  - 7
  - 8
  - 9
  - 10
  - 11
  - 12
  - 13
  - 14
  - 15
  - 16
  - 17
  - 18
  - 19
  - 20
  - 21
  - 22
  - 23
  - 24
  - 25
  - 26
  - 27
  - 28
  - 29
  - 30
  - 31
  - 32
  - 33
  - 34
  - 35
  - 36
  - 37
  - 38
  - 39
  - 40
  - 41
  - 42
  - 43
  - 44
  - 45
  - 46
  - 47
  - 48
  - 49
  - 50
  - 51
  - 52
  - 53
  - 54
  - 55
  - 56
  - 57
  - 58
  - 59
  - 60
38. Khanna R, K. J-P, West-Strum D, Mahabaleshwarkar R. Health-related quality of life and its determinants among adults with autism. *Autism*. 2014;18(2):157-167.
39. Pellicano E, Dinsmore A, Charman T. What should autism research focus upon? Community views and priorities from the United Kingdom. *Autism*. 2014;18(1):1-5.
40. Nicolaidis C. What Can Physicians Learn from the Neurodiversity Movement? *American Medical Association Journal of Ethics*. 2012;14(6):503-10.
41. Nicolaidis C, Raymaker D, Dern S, Boisclair C, Ashkenazy E, Baggs A. Comparison of healthcare experiences in autistic and non-autistic adults: a cross-sectional online survey facilitated by an academic-community partnership. *Journal of General Internal Medicine*. 2012;28(6):761-9.
42. Kapp SK, Steward R, Crane L, Elliott D, Elphick C, Pellicano E, et al. 'People should be allowed to do what they like': Autistic adults' views and experiences of stimming. *Autism*. 2019;1362361319829628.
43. Walmsley J, Johnson K. Inclusive research with people with learning disabilities: Past, present and futures. London and New York: Jessica Kingsley Publishers 2003.
44. Bigby C, Frawley P, Ramcharan P. Conceptualising inclusive research with people with intellectual disability. *Journal of Applied Research in Intellectual Disabilities*. 2014;27(1):3-12.
45. Bagatell N. From cure to community: transforming notions of autism. *Journal of the Society for Psychological Anthropology*. 2010;38(1):33-55.
46. Milton D, Bracher M. Autistics speak but are they heard? *Medical Sociology Online*. 2013;7:61-9.
47. Nind M, Vinha H. Doing research inclusively: bridges to multiple possibilities in inclusive research. *British Journal of Learning Disabilities*. 2012;42:102-9.
48. Gatfield O, Mangan C, Haar T, Kinninurgh A, Rodger S. 2016 Research Priorities Survey Report. Brisbane, Queensland, Australia: Cooperative Research Centre for Living with Autism, 2016.
49. Gotham K, Marvin AR, Talyor JL, Warren Z, Anderson CM, Law PA, et al. Characterizing the daily life, needs, and priorities of adults with autism spectrum disorder from Interactive Autism Network. *Autism*. 2015:1-11.
50. McConachie H, Mason D, Parr JR, Garland D, Wilson C, Rodgers J. Enhancing the Validity of a Quality of Life Measure for Autistic People. *J Autism Dev Disord*. 2018 May;48(5):1596-611.
51. Seltzer MM, Greenberg JS, Taylor JL, Smith LE, Orsmond GE, Esbensen A, et al. Adolescents and adults with autism spectrum disorders. In: Amaral DG, Dawson G, Geschwind D, editors. *Autism spectrum disorders* New York: Oxford University Press; 2011.
52. Lawson L, Hascheck A, Richdale AL. SASLA Snapshot: Study of Australian School-Leavers with Autism – Baseline Profile. Melbourne, Australia: Olga Tennison Autism Research Centre (OTARC), La Trobe University, 2018.
53. Haas K, Costley D, Falkmer M, Richdale A, Sofronoff K, Falkmer T. Factors Influencing the Research Participation of Adults with Autism Spectrum Disorders. *J Autism Dev Disord*. 2016 May;46(5):1793-805.
54. Walmsley J. Normalisation, emancipatory research and inclusive research in learning disability. *Disability & Society*. 2001;16(2):188-205.
55. CRC A. Inclusive research practice guide and checklists for autism research: Version 2. Brisbane, Queensland: Autism CRC Ltd., 2016.
56. Nicolaidis C, Raymaker D, Katz M, Oshwald M, Goe R, Leottie S, et al. Community-based participatory research to adapt health measures for use by people with developmental disabilities. *Progress in Community Health Partnerships: Research, Education, and Action*. 2015;9(2):141-3.

- 1
  - 2
  - 3
  - 4
  - 5
  - 6
  - 7
  - 8
  - 9
  - 10
  - 11
  - 12
  - 13
  - 14
  - 15
  - 16
  - 17
  - 18
  - 19
  - 20
  - 21
  - 22
  - 23
  - 24
  - 25
  - 26
  - 27
  - 28
  - 29
  - 30
  - 31
  - 32
  - 33
  - 34
  - 35
  - 36
  - 37
  - 38
  - 39
  - 40
  - 41
  - 42
  - 43
  - 44
  - 45
  - 46
  - 47
  - 48
  - 49
  - 50
  - 51
  - 52
  - 53
  - 54
  - 55
  - 56
  - 57
  - 58
  - 59
  - 60
57. Kroenke K, Spitzer RL, Williams JBW. The PHQ-9: validity of a brief depression severity measure. *Journal of General Internal Medicine*. 2001;16:606-13.
58. Whitehouse AJO, Bishop DVM. *Communication Checklist - Adult*: London, UK: Pearson; 2009.
59. (AIHW) AIOHaW. *Autism in Australia*. Web Report. Canberra, Australia: AIHW, 2017 5-4-17. Report No.
60. Hoekstra RA, Vinkhuyzen AAE, Wheelwright S, Bartels M, Boomsma DI, Baron-Cohen S, et al. The construction and validation of an abridged version of the Autism-Spectrum Quotient. *Journal of Autism and Developmental Disorders*. 2011;41:589-96.
61. Evans E, Trollor J, Davis A, Bhardwaj A, O'Brien E. *Mental health and carer support in elders with ID*. Report to Ageing, Disability and Home Care, Department of Family and Community Services, NSW Australia. Sydney, Australia: Department of Developmental Disability Neuropsychiatry, UNSW Sydney, 2015.
62. StataCorp. *Stata Statistical Software: Release 14*. College Station, TX: StataCorp LP; 2015.
63. IBM\_Corp. *IBM SPSS Statistics for Windows, Version 22.0*. Armonk, NY: IBM Corp; 2013.
64. Beesdo-Baum K, Klotsche J, Knappe S, Craske MG, LeBeau RT, Hoyer J, et al. Psychometric properties of the dimensional anxiety scales for DSM-V in an unselected sample of German treatment seeking patients. *Depression and Anxiety*. 2012;29(12):1014-24.
65. Cvejic RC, Arnold SRC, Foley K-R, Trollor JN. Neuropsychiatric profile and psychotropic medication use in adults with autism spectrum disorder: results from the Australian Longitudinal Study of Adults with Autism. *BJPsych Open*. 2018;4(6):461-6. Epub 11/13.
66. Stacey T-L, Froude EH, Trollor J, Foley K-R. Leisure participation and satisfaction in autistic adults and neurotypical adults. *Autism*. 2018;0(0):1362361318791275. PubMed PMID: 30132680.
67. Hwang YI, Foley K-R, Trollor JN. Aging Well on the Autism Spectrum: An Examination of the Dominant Model of Successful Aging. *Journal of Autism and Developmental Disorders*. 2018 May 02.
68. Ee D, Hwang J, Reppermund S, Srasuebkul P, Trollor J, Foley K-R, et al. Loneliness in Adults on the Autism Spectrum. 2019.
69. Harsanyi M, Foley K-R, Froude E, Trollor J, Arnold SRC. *Employment Profiles of Autistic Adults in Australia*. 2019.
70. Cai RY, Richdale AL, Foley K-R, Trollor J, Uljarević M. Brief report: Cross-sectional interactions between expressive suppression and cognitive reappraisal and its relationship with depressive symptoms in autism spectrum disorder. *Research in Autism Spectrum Disorders*. 2018 2018/01/01;45:1-8.
71. Hedley D, Uljarević M, Foley K-R, Richdale A, Trollor J. Risk and protective factors underlying depression and suicidal ideation in Autism Spectrum Disorder. *Depression and Anxiety*. 2018;35(7):648-57.
72. Arnold SRC, Uljarevic M, Hwang J, Richdale A, Trollor J, Lawson LP. Brief Report: Psychometric Properties of the Patient Health Questionnaire-9 (PHQ-9) in Autistic Adults. *Journal of Autism and Developmental Disorders*. 2019.
73. Uljarevic M, Hedley D, Foley K-R, Magiati I, Cai RY, Dissanayake C, et al. Anxiety and depression from adolescence to old age in autism spectrum disorder. 2019.
74. Baldwin S, Costley D. The experiences and needs of female adults with high-functioning autism spectrum disorder. *Autism*. 2016;20(4):483-95.

- 1  
2  
3 75. Fan W, Yan Z. Factors affecting response rates of the web survey: A systematic  
4 review. *Computers in Human Behavior*. 2010 2010/03/01/;26(2):132-9.  
5  
6 76. Guo X, Vittinghoff E, Olgin JE, Marcus GM, Pletcher MJ. Volunteer Participation in  
7 the Health eHeart Study: A Comparison with the US Population. *Scientific Reports*. 2017  
8 2017/05/16/;7(1):1956.  
9  
10 77. Fletcher-Watson S, Adams J, Brook K, Charman T, Crane L, Cusack J, et al. Making  
11 the future together: Shaping autism research through meaningful participation. *Autism*.  
12 2019;0(0):1362361318786721.  
13  
14 78. Loomes R, Hull L, Mandy WPL. What Is the Male-to-Female Ratio in Autism  
15 Spectrum Disorder? A Systematic Review and Meta-Analysis. *Journal of the American  
16 Academy of Child & Adolescent Psychiatry*. 2017 2017/06/01/;56(6):466-74.  
17  
18 79. Gilmour L, Schalomon PM, Smith V. Sexuality in a community based sample of  
19 adults with autism spectrum disorder. *Research in Autism Spectrum Disorders*. 2012  
20 2012/01/01/;6(1):313-8.  
21  
22 80. Kapp SK, Gillespie-Lynch K, Sherman LE, Hutman T. Deficit, difference, or both?  
23 Autism and neurodiversity. *Developmental Psychology*. 2013 2013;49(1):59-71.  
24  
25 81. Nicolaidis C, Raymaker D, McDonald K, Dern S, Boisclair C, Ashkenazy E, et al.  
26 Comparison of healthcare experiences in autistic and non-autistic adults: A cross-sectional  
27 online survey facilitated by an academic-community partnership. *Journal of General Internal  
28 Medicine*. 2013;28(6):761-9.  
29  
30 82. Whiteley P, Todd L, Carr K, Shattock P. Gender Ratios in Autism, Asperger  
31 Syndrome and Autism Spectrum Disorder. *Autism Insights; London*. 2010 2010;2:17.  
32 English.  
33  
34 83. Chadwick D, Wesson C, Fiullwood C. Internet Access by People with Intellectual  
35 Disabilities: Inequalities and Opportunities. *Future Internet*. 2013;5(3):376-97.  
36  
37 84. Fusar-Poli L, Brondino N, Rocchetti M, Panisi C, Provenzani U, Damiani S, et al.  
38 Diagnosing ASD in Adults Without ID: Accuracy of the ADOS-2 and the ADI-R. *Journal of  
39 Autism and Developmental Disorders*. 2017 November 01;47(11):3370-9.  
40  
41 85. Barrett SL, Uljarević M, Baker EK, Richdale AL, Jones CRG, Leekam SR. The Adult  
42 Repetitive Behaviours Questionnaire-2 (RBQ-2A): A Self-Report Measure of Restricted and  
43 Repetitive Behaviours. *Journal of Autism and Developmental Disorders*. 2015  
44 2015/11/01/;45(11):3680-92.  
45  
46 86. Robertson AE, Simmons DR. The relationship between sensory sensitivity and  
47 autistic traits in the general population. *Journal of Autism and Developmental Disorders*.  
48 2012;43:775-84.  
49  
50 87. Carleton RN, Norton PJ, Asmundson GJG. Fearing the unknown: a short version of  
51 the intolerance of uncertainty scale. *Journal of Anxiety Disorders*. 2007;21:105-17.  
52  
53 88. Spitzer RL, Williams JBW, Kroenke K, Linzer M, deGruy FV, Hahn SR. Utility of  
54 new procedure for diagnosis mental-disorders in primary-care: the PRIME-MD 1000 study.  
55 *Journal of American Medical Association*. 1994;272:1749-56.  
56  
57 89. Ware JE, Kosinski M, Keller SD. A 12-Item Short-Form Health Survey: construction  
58 of scales and preliminary tests of reliability and validity. *Medical care*. 1996;34(3):220.  
59  
60 90. Sletten DM, Suarez GA, Low PA, Mandrekar J, Singer W. COMPASS 31: A refined  
and abbreviated composite autonomic symptom score. *Mayo Clinic Proceedings*.  
2012;87(12):1196-201.  
91. Buysse DJ, Reynolds CF, Monk TH, Berman SR, Kupfer DJ. The Pittsburgh Sleep  
Quality Index: a new instrument for psychiatric practise and research. *Psychiatry Reserves*.  
1989;28:193-213.  
92. Gardisar M, Lack L, Richards H, Harris J, Gallasch J, Boundy M, et al. The Flinders  
Fatigue Scale: preliminary psychometric properties and clinical sensitivity of a new scale for

- 1  
2  
3 measuring daytime fatigue associated with insomnia. *Journal of Clinical Sleep Medicine*.  
4 2007;3(7):722-8.
- 5 93. Craske MG, Wittchen H-U, Bogels S, Stein M, Andrews G, Lebeu R. Severity  
6 measure for Generalized Anxiety Disorder - adult: American Psychiatric Association; 2013.
- 7 94. Tennant R, Hiller L, Fishwick R, Platt S, Joseph S, Weich S, et al. The Warwick-  
8 Edinburgh mental well-being scale (WEMWBS): development and UK validation. *Health  
9 and Quality of Life Outcomes*. 2007;5(63):1-13.
- 10 95. Chen G, Gully SM, Eden D. Validation of a new general self-efficacy scale.  
11 *Organizational Research Methods*. 2001;4(1):62-83.
- 12 96. Gross JJ, John OP. Individual differences in two emotion regulation processes:  
13 implications for affect, relationships, and well-being. *Journal of Personality and Social  
14 Psychology*. 2003;85(2):348-62.
- 15 97. Mohr C, Tonge BJ, Einfeld SL, Taffe J. The Developmental Behaviour Checklist for  
16 Adults (DBC-A) Revised. Sydney, Australia: University of Sydney and Monash University,  
17 2011.
- 18 98. Carver CS. You want to measure coping but your protocol's too long: consider the  
19 brief COPE. *International journal of behavioral medicine*. 1997;4(1):92-100.
- 20 99. Crook TH, 3rd, Feher EP, Larrabee GJ. Assessment of memory complaint in age-  
21 associated memory impairment: the MAC-Q. *International psychogeriatrics*. 1992  
22 Fall;4(2):165-76.
- 23 100. Hays RD, DiMatteo MR. A short-form measure of loneliness. *Journal of Personality  
24 Assessment*. 1987;51:69-81.
- 25 101. Sarason IG, Levine HM, Basham RB, Sarason BR. Assessing social support: the  
26 social support questionnaire. *Journal of Personality and Social Psychology*. 1983;44(1):127-  
27 39.
- 28 102. The WHOQOL Group. The World Health Organization Quality of Life assessment  
29 (WHOQOL)-BREF quality of life assessment. *Psychological Medicine*. 1995;28:551-5.
- 30 103. Maenner MJ, Smith LE, Hong J, Makuch R, Greenberg JS, Mailick MR. Evaluation  
31 of an activities of daily living scale for adolescents and adults with developmental  
32 disabilities. *Disability and Health Journal* 2013;6(1):8-17.
- 33 104. Luciano JV, Ayuso-Mateos JL, Aguado J, Fernandez A, Serrano-Blanco A, Roca M,  
34 et al. The 12-item World Health Organisation Disability Assessment Schedule (WHO-DAS  
35 II): a nonparametric item response analysis *BMC Medical Research Methodology*.  
36 2010;10(45):1-9.
- 37 105. Taylor JL, Seltzer MM. Developing a vocational index for adults with autism  
38 spectrum disorders. *Journal of Autism and Developmental Disorders*. 2012;42(12):2669-79.
- 39 106. Beard JG, Ragheb MG. Measuring leisure satisfaction. *Journal of Leisure Research*.  
40 1980;12:20-33.
- 41 107. Chisholm D, Knapp MRJ, Knudsen HC, Amaddeo F, Gaité L, van Wijngaarden B, et  
42 al. Client socio-demographic and service receipt inventory - European version: development  
43 of an instrument for international research. *The British Journal of Psychiatry*. 2000;177:28-  
44 33.
- 45 108. Bengtson VL, Allen KR. The life course perspective applied to families overtime. In:  
46 Boss P, Doherty W, LaRossa R, Schumm W, Steinmetz S, editors. *Sourcebook of family  
47 theories and methods: a contextual approach*. New York: Plenum Press; 1993. p. 469-98.
- 48 109. McCarron M, Gill M, Lawlor B, Beagly C. A pilot study of the reliability and validity  
49 of the Caregiver Activity Survey - Intellectual disability (CAS-ID). *Journal of Intellectual  
50 Disability Research*. 2002;46(8):605-12.
- 51  
52  
53  
54  
55  
56  
57  
58  
59  
60

1  
2  
3 110. Bedard M, Molloy DW, Squire L, Dubois BA, Lever JA, O'Donnell M. The Zarit  
4 Burden Interview: a new short version and screening version. *The Gerontologist*.  
5 2001;41(5):652-7.

6  
7 111. Alliance NRH. *The little book of rural health numbers*: Author; 2015. Available from:  
8 <https://www.ruralhealth.org.au/book/little-book-rural-health-numbers>.

9  
10  
11  
12  
13  
14  
15  
16  
17  
18  
19  
20  
21  
22  
23  
24  
25  
26  
27  
28  
29  
30  
31  
32  
33  
34  
35  
36  
37  
38  
39  
40  
41  
42  
43  
44  
45  
46  
47  
48  
49  
50  
51  
52  
53  
54  
55  
56  
57  
58  
59  
60

For peer review only



1  
2  
3  
4  
5  
6  
7  
8  
9  
10  
11  
12  
13  
14  
15  
16  
17  
18  
19  
20  
21  
22  
23  
24  
25  
26  
27  
28  
29  
30  
31  
32  
33  
34  
35  
36  
37  
38  
39  
40  
41  
42  
43  
44  
45  
46  
47  
48  
49  
50  
51  
52  
53  
54  
55  
56  
57  
58  
59  
60

**Figure Caption Sheet**

*Figure 1.* Satisfaction responses upon completion combined by survey type (n=482)

For peer review only

Figure 1 top

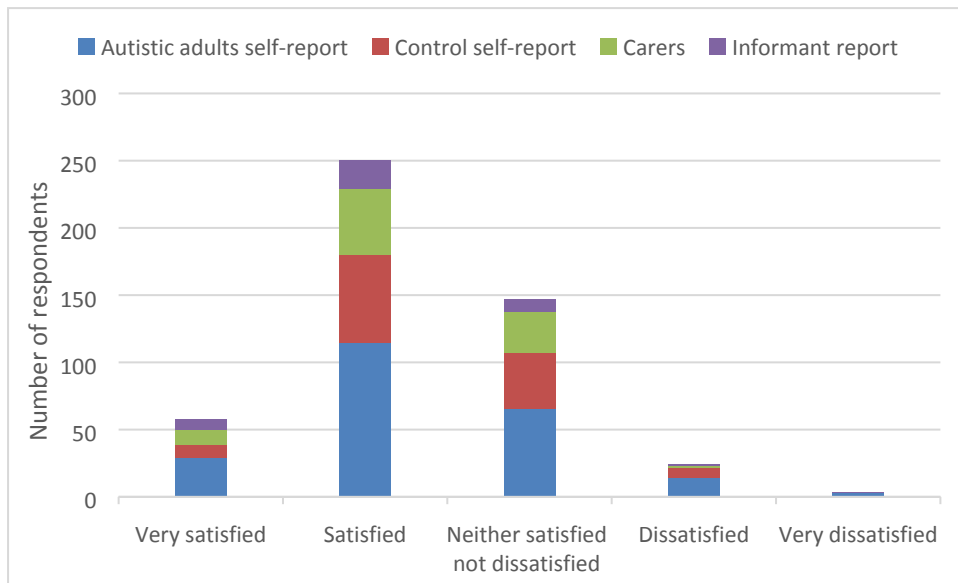

peer review only

Table 1

*The ALSAA Inclusive Research Protocol*

| <b>Step</b>                                                     | <b>Description of step and considerations</b>                                                                                                                                                                                                                                                                                                                                                                                                                                                                                                                                                                                                                                                                                                                                           |
|-----------------------------------------------------------------|-----------------------------------------------------------------------------------------------------------------------------------------------------------------------------------------------------------------------------------------------------------------------------------------------------------------------------------------------------------------------------------------------------------------------------------------------------------------------------------------------------------------------------------------------------------------------------------------------------------------------------------------------------------------------------------------------------------------------------------------------------------------------------------------|
| Step 1:<br>Recruitment of<br>advisors / peer-<br>researchers    | Ensure recruitment is inclusive of all potential autistic individuals including adults with intellectual disability, consider using multiple channels of recruitment (e.g., Autism associations, self-advocacy networks, carer networks, adult networks, local radio, social media and word of mouth). In Australia, seek support from the Autism CRC Research Academy*.                                                                                                                                                                                                                                                                                                                                                                                                                |
| Step 2: Building<br>rapport                                     | If an established relationship does not already exist between the autistic individual and researcher, the researcher should offer to meet the individual (either face-to-face, over video conference or phone call). Be mindful that some autistic individuals may prefer to communicate via text or email and not to meet in person and should not be required to.                                                                                                                                                                                                                                                                                                                                                                                                                     |
| Step 3: Clarify<br>what will be<br>expected from the<br>advisor | Outline tasks autistic advisors or peer researchers will be asked to complete. Specify the frequency and timing of when they are likely to be contacted. For specific tasks clearly provide step-by-step instructions, flexible lead-time, timeframes for feedback, area of investigation, and broad aim of the study. Make information available in Easy English or plain language as appropriate. Specify the type and nature of advice sought. Clearly describe how and where their input will be used and why their input is being sought.                                                                                                                                                                                                                                          |
| Step 4: Ethics,<br>confidentiality and<br>acknowledgement       | Describe ethics of the project and expected confidentiality. As required, specify on individual documents that the document is confidential and not to be distributed without discussion with the researcher. Can the autistic individual opt out if they would like? Outline what will happen if they choose to withdraw, e.g., this will not affect their relationship with the research team, university or any other associated organisations. It is a voluntary process. Negotiate and make explicit how the autistic advisor or peer-researcher will be acknowledged. Consider how the autistic individual may be recognised in a manuscript or research output. This may include as a co-author, in the acknowledgements section, and/or in discussing methodology and findings. |
| Step 5: Identify<br>preferred<br>communication<br>style         | Ask the autistic individual their preferred communication style for providing feedback (e.g., face-to-face, phone call, email, video, or a variety of techniques). Also, in what medium they would like to receive the results/findings e.g., academic writing style, easy English writing style, mostly graphs/pictures, mostly dot points, described in person, video, PowerPoint presentation, etc. Although not all mediums may be practical, it is important to identify the autistic advisor's preferred style and then work together to identify a medium of communication which will be understood and accessible by both the autistic advisor and the researcher.                                                                                                              |
| Step 6: The sensory<br>environment                              | The researcher must provide an 'autism-friendly' environment on any occasion where the autistic advisor and the researcher may be meeting in person, see p. 12-15 in the <i>Autism CRC Inclusive Research Practice Guides and Checklists for Autism Research</i> <sup>55</sup> regarding creating autism-friendly environments.                                                                                                                                                                                                                                                                                                                                                                                                                                                         |
| Step 7:<br>Involvement in<br>methodological                     | Autistic advisors input is sought in regard to questionnaire design and interpretation of results. The researcher will need to present questionnaire design questions or quantitative or qualitative results in an understandable format, developing design issue summaries or results summaries in the                                                                                                                                                                                                                                                                                                                                                                                                                                                                                 |

|                             |                                                                                                                                                                                                                                                                                                                                                                                                                                                                                                                                                                                                                                                                                                                           |
|-----------------------------|---------------------------------------------------------------------------------------------------------------------------------------------------------------------------------------------------------------------------------------------------------------------------------------------------------------------------------------------------------------------------------------------------------------------------------------------------------------------------------------------------------------------------------------------------------------------------------------------------------------------------------------------------------------------------------------------------------------------------|
| design / results / findings | medium preferred by the autistic advisor or peer-researcher. This means the researcher may need to make a number of decisions around data analysis and interpretation.<br>Where possible, outline each of these decisions so the process is transparent and the autistic advisor can reflect on the decisions made by the researcher and whether these were appropriate in their view. Provide clear guidance on what advice is being sought, provide lead time, and the timeframe and process to follow for providing advice. How long should the advice be? In what format? Who will be reading it, who do they send the advice to? What are the researchers specifically looking for, what should the advice focus on? |
| Step 8: Feedback            | Once the researcher receives the advice from the autistic advisor, the researcher should provide a timeframe in which the autistic advisor will receive an update on what aspects of the advice was incorporated and the effect it had/didn't have on the methodology, findings, and/or interpretation.                                                                                                                                                                                                                                                                                                                                                                                                                   |
| Step 9: Final checks        | Once the manuscript or research output has been further developed, the autistic advisor should receive a copy of the manuscript prior to submission. If the autistic advisor has limited experience with academic writing, the researcher should offer to describe/provide a lay summary of the overall article for the advisor.                                                                                                                                                                                                                                                                                                                                                                                          |
| Step 10: Acknowledgement    | Autistic advisor or peer-researcher to be acknowledged in the agreed upon manner (e.g., co-author, thanked in the acknowledgement section, acknowledged during a presentation etc.)                                                                                                                                                                                                                                                                                                                                                                                                                                                                                                                                       |

\*The Autism CRC Research Academy (<https://www.autismcrc.com.au/research-academy>) provides training for peer researchers.

Table 2

*Measurements included in the ALSAA surveys*

| Measure / domain                                                                                | Self-report | Informant report | Carer |
|-------------------------------------------------------------------------------------------------|-------------|------------------|-------|
| Demographics and personal characteristics                                                       |             |                  |       |
| Basic demographics<br>(Age, Sex, Ethnicity, English speaking status)                            | ✓           | ✓                | ✓     |
| Other demographics<br>(Education, Occupation <sup>a</sup> , Family & living conditions, Income) | ✓           | ✓                | ✓     |
| Autism Characteristics                                                                          |             |                  |       |
| The Autism Quotient - Short <sup>b</sup> (AQ-Short) <sup>60</sup>                               | ✓           | ✓                | ✓     |
| Repetitive Behaviours Questionnaire-2 Adult Version (RBQ-2A) <sup>85</sup>                      | ✓           | ✓                |       |
| The Glasgow Sensory Questionnaire <sup>86</sup>                                                 | ✓           | ✓                |       |
| The Intolerance of Uncertainty Scale-12 <sup>87</sup>                                           | ✓           |                  | ✓     |
| Health & Well-Being                                                                             |             |                  |       |
| Medical history                                                                                 | ✓           | ✓                | ✓     |
| Medication profile                                                                              | ✓           | ✓                |       |
| Smoking, alcohol and illicit drug use <sup>a</sup>                                              | ✓           | ✓                |       |
| The Patient Health Questionnaire-15 <sup>88</sup>                                               | ✓           |                  | ✓     |
| Medical Outcomes Study Short Form Health Survey-12 (SF-12) <sup>89</sup>                        | ✓           | ✓                | ✓     |
| The Composite Autonomic Symptom Score - 31 (COMPASS 31) <sup>90</sup>                           | ✓           |                  |       |
| Pittsburgh Sleep Quality Index <sup>91</sup>                                                    | ✓           |                  |       |
| Flinders Fatigue Scale <sup>92</sup>                                                            | ✓           |                  |       |
| Mental & Emotional Health                                                                       |             |                  |       |
| DSM-5 Dimensional Anxiety Scales: Generalized Anxiety Disorder-Adult (DSM5 GAD-A) <sup>93</sup> | ✓           |                  | ✓     |
| The Patient Health Questionnaire-9 (PHQ-9) <sup>57</sup>                                        | ✓           |                  | ✓     |
| The Warwick Edinburgh Mental Well-being Scale <sup>94</sup>                                     | ✓           |                  |       |
| The New General Self-Efficacy Scale <sup>95</sup>                                               | ✓           |                  |       |
| The Emotion Regulation Questionnaire <sup>96</sup>                                              | ✓           |                  | ✓     |
| Developmental Behaviour Checklist-Adolescent/Adult version (DBC-A) Revised <sup>97</sup>        |             | ✓                |       |
| The Brief COPE <sup>98</sup>                                                                    | ✓           |                  | ✓     |
| Memory Complaint Questionnaire (MAC-Q) <sup>99</sup>                                            | ✓           |                  |       |
| Relationships & Social Networks                                                                 |             |                  |       |
| UCLA Loneliness Scale-8 (ULS-8) <sup>100</sup>                                                  | ✓           |                  |       |
| Supports and networks <sup>a</sup>                                                              | ✓           | ✓                |       |
| The Social Support Questionnaire (SSQ) <sup>101</sup>                                           | ✓           |                  | ✓     |
| Activities, Participation & Quality of Life                                                     |             |                  |       |

1  
2  
3  
4  
5  
6  
7  
8  
9  
10  
11  
12  
13  
14  
15  
16  
17  
18  
19  
20  
21  
22  
23  
24  
25  
26  
27  
28  
29  
30  
31  
32  
33  
34  
35  
36  
37  
38  
39  
40  
41  
42  
43  
44  
45  
46  
47  
48  
49  
50  
51  
52  
53  
54  
55  
56  
57  
58  
59  
60

|                                                                                      |   |   |   |
|--------------------------------------------------------------------------------------|---|---|---|
| WHOQOL-BREF <sup>102</sup>                                                           | ✓ |   | ✓ |
| Waisman Activities of Daily Living Scale (W-ADL) <sup>103</sup>                      | ✓ | ✓ |   |
| World Health Organisation Disability Assessment Schedule (WHO-DAS II) <sup>104</sup> | ✓ | ✓ | ✓ |
| Vocational Index for Adults with Autism <sup>105</sup>                               | ✓ | ✓ |   |
| Special abilities and interests <sup>c</sup>                                         | ✓ |   |   |
| Leisure activities participation                                                     | ✓ | ✓ |   |
| Leisure Satisfaction Scale (LSS) <sup>106</sup>                                      | ✓ |   |   |
| Driving and transport                                                                | ✓ | ✓ | ✓ |
| Service Usage                                                                        |   |   |   |
| Client Service Receipt Inventory (CSRI) <sup>107</sup>                               | ✓ | ✓ |   |
| Health service seeking behaviour                                                     | ✓ | ✓ |   |
| Early intervention service history                                                   | ✓ | ✓ |   |
| Justice system contact                                                               | ✓ | ✓ |   |
| Preventative health screening                                                        | ✓ | ✓ |   |
| Caring                                                                               |   |   |   |
| Positive Affect Index <sup>108</sup>                                                 |   |   | ✓ |
| Caregiver Activity Survey (CAS-ID) <sup>109</sup>                                    |   |   | ✓ |
| Zarit Burden Interview <sup>110</sup>                                                |   |   | ✓ |

<sup>a</sup> Based on questions from the National Health Survey of Mental Health and Wellbeing (Slade, Johnston, Oakley Browne, Andrews, & Whiteford, 2009). <sup>b</sup>A 28-item parent-carer report adaptation using items from the AQ-Adolescent (Baron-Cohen, Hoekstra, Knickmeyer, & Wheelwright, 2006) was used for the informant-report survey <sup>c</sup>Based on questions from the Interactive Autism Network (<https://iancommunity.org/>)

Table 3

*Recruitment statistics at close of Time 1 data gathering*

| Sample                              | Registered | Ineligible (%) | Withdrawn (%) | Partial Completion (%) | Completed (%) |
|-------------------------------------|------------|----------------|---------------|------------------------|---------------|
| Self-report autistic adults         | 345        | 6 (2)          | 11 (3)        | 16 (5)                 | 237 (69)      |
| Self-report non-autistic adults     | 221        | 7 (3)          | 20 (9)        | 16 (7)                 | 130 (59)      |
| Carer                               | 185        | 22 (12)        | 13 (7)        | 2 (1)                  | 100 (54)      |
| Informant-report for autistic adult | 78         | 5 (6)          | 9 (11)        | 0 (0)                  | 42 (54)       |

Table 4

*Participant Characteristics*

| Characteristic                    | Autistic adults self-report formally diagnosed (N=221) | Autistic adults self-report no formal diagnosis (N=32) | Autistic adults informant-report (N=42) | Carers (N=102) | Non-autistic self-report (N=146) |
|-----------------------------------|--------------------------------------------------------|--------------------------------------------------------|-----------------------------------------|----------------|----------------------------------|
| Age mean (SD)                     | 41.8 (12.2)                                            | 44.2 (8.1)                                             | 32.5 (9.9)                              | 56.3 (11.2)    | 43.7 (13.5)                      |
| Gender (%)                        |                                                        |                                                        |                                         |                |                                  |
| Male                              | 86 (39)                                                | 14 (44)                                                | 34 (81)                                 | 16 (16)        | 29 (20)                          |
| Female                            | 124 (56)                                               | 17 (53)                                                | 8 (19)                                  | 85 (83)        | 117 (80)                         |
| Other                             | 11 (5)                                                 | 1 (3)                                                  | 0                                       | 1 (1)          | 0                                |
| <sup>a</sup> Ethnicity (%)        |                                                        |                                                        |                                         |                |                                  |
| Caucasian                         | 194 (88)                                               | 25 (78)                                                | 38 (90)                                 | 86 (89)        | 122 (85)                         |
| Other                             | 27 (12)                                                | 7 (22)                                                 | 4 (9)                                   | 11 (11)        | 22 (15)                          |
| Multilingual (%)                  | 26 (12)                                                | 5 (16)                                                 | 0                                       | 6 (6)          | 18 (12)                          |
| <sup>b</sup> SEIFA decile (SD)    | 6.18 (2.89)                                            | 5.74 (3.09)                                            | 6.58 (2.88)                             | 6.60 (2.78)    | 7.01 (2.60)                      |
| <sup>bc</sup> Rural / Remoteness  |                                                        |                                                        |                                         |                |                                  |
| Major City                        | 146 (71)                                               | 17 (55)                                                | 32 (84)                                 | 72 (73)        | 114 (83)                         |
| Inner Regional                    | 44 (21)                                                | 10 (32)                                                | 5 (13)                                  | 21 (21)        | 19 (14)                          |
| Outer Regional                    | 12 (6)                                                 | 4 (13)                                                 | 1 (3)                                   | 5 (5)          | 5 (4)                            |
| Remote / Very Remote              | 4 (2)                                                  | 0                                                      | 0                                       | 0              | 0                                |
| <sup>d</sup> Living situation (%) |                                                        |                                                        |                                         |                |                                  |
| Living alone                      | 58 (26)                                                | 9 (28)                                                 | 3 (7)                                   | 14 (14)        | 26 (18)                          |
| Living as couple                  | 95 (43)                                                | 18 (56)                                                | 4 (9)                                   | 74 (75)        | 105 (72)                         |
| Living with parents               | 31 (14)                                                | 0                                                      | 24 (57)                                 | 0              | 5 (3)                            |
| Living with other relatives       | 3 (1)                                                  | 0                                                      | 1 (2)                                   | 6 (6)          | 3 (2)                            |
| Living with others                | 20 (9)                                                 | 5 (16)                                                 | 8 (19)                                  | 4 (4)          | 5 (3)                            |
| Other                             | 14 (6)                                                 | 0                                                      | 2 (5)                                   | 1 (1)          | 2 (1)                            |
| <sup>e</sup> Marital Status (%)   |                                                        |                                                        |                                         |                |                                  |
| Single                            | 73 (33)                                                | 7 (22)                                                 | 36 (86)                                 | 4 (4)          | 22 (15)                          |
| Married                           | 66 (30)                                                | 12 (37)                                                | 4 (9)                                   | 65 (66)        | 90 (62)                          |
| De facto                          | 17 (8)                                                 | 3 (9)                                                  | 0                                       | 8 (8)          | 14 (9)                           |
| Never married                     | 8 (4)                                                  | 3 (9)                                                  | 2 (5)                                   | 2 (2)          | 3 (2)                            |
| Widowed                           | 1 (0)                                                  | 0                                                      | 0                                       | 3 (3)          | 2 (1)                            |
| Divorced now single               | 21 (9)                                                 | 3 (9)                                                  | 0                                       | 8 (8)          | 9 (6)                            |
| Divorced now remarried / de facto | 12 (5)                                                 | 2 (6)                                                  | 0                                       | 2 (2)          | 2 (1)                            |
| Separated                         | 7 (3)                                                  | 1 (3)                                                  | 0                                       | 2 (2)          | 1 (1)                            |
| Other                             | 16 (7)                                                 | 1 (3)                                                  | 0                                       | 4 (4)          | 3 (2)                            |
| Educational Status (%)            |                                                        |                                                        |                                         |                |                                  |



|                              |                           |                         |                         |                         |                           |
|------------------------------|---------------------------|-------------------------|-------------------------|-------------------------|---------------------------|
| Completed high school        | 163 (76)<br><i>n</i> =215 | 20 (64)<br><i>n</i> =31 | 21 (51)<br><i>n</i> =41 | 86 (88)<br><i>n</i> =98 | 120 (86)<br><i>n</i> =139 |
| Vocational education         | 61 (35)<br><i>n</i> =174  | 16 (57)<br><i>n</i> =28 | 4 (11)<br><i>n</i> =35  | 17 (17)<br><i>n</i> =98 | 20 (16)<br><i>n</i> =127  |
| University education         | 113 (65)<br><i>n</i> =174 | 12 (43)<br><i>n</i> =28 | 1 (3)<br><i>n</i> =35   | 59 (60)<br><i>n</i> =98 | 107 (84)<br><i>n</i> =127 |
| <sup>f</sup> Employment (%)  |                           |                         |                         |                         |                           |
| Open employment              | 116 (57)                  | 20 (69)                 | 6 (15)                  | 59 (60)                 | 104 (76)                  |
| Student / other day activity | 38 (19)                   | 3 (10)                  | 24 (60)                 | 3 (3)                   | 17 (12)                   |
| Retired, no volunteering     | 8 (4)                     | 2 (7)                   | 2 (5)                   | 19 (19)                 | 6 (4)                     |
| Homecare                     | 17 (8)                    | 3 (10)                  | 0                       | 9 (9)                   | 9 (6)                     |
| No activity                  | 22 (11)                   | 1 (3)                   | 8 (20)                  | 9 (9)                   | 1 (1)                     |

<sup>a</sup> Ethnicity: Carers, *n*=97; Non-autistic (self-report), *n*=144

<sup>b</sup> Autistic adults (diagnosis, self-report), *n*=209; Autistic adults (no diagnosis, self-report), *n*=31; Autistic adults (informant report), *n*=38; Carers, *n*=99; Non-autistic (self-report), *n*=138

<sup>c</sup> Australian population is 70% Major city, 18% Inner regional, 9% Outer regional, 1% Remote, 1% Very remote in the 2011 Census<sup>11</sup>

<sup>d</sup> Carers' Living situation: *n*=99

<sup>e</sup> Carers' Marital status: *n*=98

<sup>f</sup> Employment: Autistic adults (diagnosis, self-report), *n*=201; Autistic adults (no diagnosis, self-report), *n*=29; Autistic adults (informant report), *n*=40; Carers, *n*=99; Non-autistic (self-report), *n*=137

Table 5

*Diagnostic Characteristics*

| Characteristic                              | Autistic adults self-report formally diagnosed (N=221) | Autistic adults self-report no formal diagnosis (N=32) | Autistic adults informant-report (N=42) | Carers (N=102)                   | Non-autistic self-report (N=146) |
|---------------------------------------------|--------------------------------------------------------|--------------------------------------------------------|-----------------------------------------|----------------------------------|----------------------------------|
| AQ score mean (SD)                          | 87.6 (10.3)<br>n=210                                   | 83.7 (8.8)                                             | 84.2 (9.5)<br>n=36                      | 57.3 (13.8)<br>n=60 <sup>a</sup> | 55.1 (11.9)<br>n=137             |
| Above AQ Cutoff (%)                         | 203 (97)                                               | 31 (97)                                                | 35 (97)                                 | 18 (30)                          | 30 (22)                          |
| <sup>b</sup> Autism Diagnosis               |                                                        |                                                        |                                         |                                  |                                  |
| Autism spectrum disorder / condition        | 49 (22)                                                | -                                                      | 17 (40)                                 | -                                | -                                |
| Asperger's syndrome                         | 130 (59)                                               | -                                                      | 11 (26)                                 | -                                | -                                |
| Autistic disorder                           | 1 (0)                                                  | -                                                      | 6 (14)                                  | -                                | -                                |
| 'High-functioning' autism                   | 32 (14)                                                | -                                                      | 3 (7)                                   | -                                | -                                |
| PDD-NOS                                     | 1 (0)                                                  | -                                                      | 1 (2)                                   | -                                | -                                |
| Other                                       | 6 (3)                                                  | -                                                      | 2 (5)                                   | -                                | -                                |
| No formal diagnosis                         | -                                                      | 32 (100)                                               | 1 (2)                                   | -                                | -                                |
| Age at Diagnosis Mean (SD)                  | 35.3 (15.1)<br>n=217                                   | -                                                      | 10.01 (10.8)<br>n=38                    | -                                | -                                |
| Years since Diagnosis Mean (SD)             | 6.9 (8.3)<br>n=217                                     | -                                                      | 21.9 (9.8)<br>n=38                      | -                                | -                                |
| Intellectual Disability (%)                 | 10 (4)                                                 | 1 (3)                                                  | 33 (78)                                 | 1 (1)                            | 1 (1)                            |
| Other Developmental Disability (%)          | 6 (3)                                                  | 2 (6)                                                  | 9 (21)                                  | 0                                | 1 (1)                            |
| <sup>c</sup> Other Psychiatric Diagnosis(%) |                                                        |                                                        |                                         |                                  |                                  |
| Currently                                   | 148 (69)<br>n=213                                      | 13 (42)<br>n=31                                        | 22 (52)                                 | 38 (39)<br>n=100                 | 29 (21)<br>n=140                 |
| At any time                                 | 191 (89)<br>n=213                                      | 28 (90)<br>n=31                                        | 31 (74)                                 | 68 (68)<br>n=100                 | 67 (48)<br>n=140                 |
| Depression (PHQ-9) above cut-off (%)        | 103 (52)<br>n=199                                      | 15 (52)<br>n=29                                        | -                                       | 28 (29)<br>n=97                  | 15 (12)<br>n=126                 |
| Anxiety (DSM5 GAD-A) above cut-off (%)      | 115 (56)<br>n=206                                      | 14 (47)<br>n=32                                        | -                                       | 27 (27)<br>n=99                  | 14 (11)<br>n=130                 |

<sup>a</sup> Carers were asked to complete the AQ scale only if they were a biological relative of the adult with autism

<sup>b</sup> Autism diagnosis: Autistic adults (self-report, diagnosed),  $n=220$

<sup>c</sup> Recording of a psychiatric diagnosis apart from autism spectrum conditions or intellectual disability

For peer review only

Table 6

*Carer Characteristics (N=102)*

| Characteristic                                              | Frequency / Mean          |
|-------------------------------------------------------------|---------------------------|
| Relationship to autistic person (%)                         |                           |
| Mother                                                      | 42 (43, <i>n</i> =98)     |
| Father                                                      | 10 (10, <i>n</i> =98)     |
| Partner/spouse                                              | 23 (23, <i>n</i> =98)     |
| Sibling                                                     | 2 (2, <i>n</i> =98)       |
| Child                                                       | 1 (1, <i>n</i> =98)       |
| Carer – unspecified                                         | 17 (17, <i>n</i> =98)     |
| Other                                                       | 3 (3, <i>n</i> =98)       |
| Age of autistic adult cared for mean ( <i>SD</i> )          | 37.5 (13.2)               |
| Hours spent per week with autistic adult mean ( <i>SD</i> ) | 63.4 (57.8, <i>n</i> =92) |

1  
2  
3  
4  
5  
6  
7  
8  
9  
10  
11  
12  
13  
14  
15  
16  
17  
18  
19  
20  
21  
22  
23  
24  
25  
26  
27  
28  
29  
30  
31  
32  
33  
34  
35  
36  
37  
38  
39  
40  
41  
42  
43  
44  
45  
46  
47  
48  
49  
50  
51  
52  
53  
54  
55  
56  
57  
58  
59  
60

For peer review only

# BMJ Open

## Cohort profile: The Australian Longitudinal Study of Adults with Autism (ALSAA)

|                                 |                                                                                                                                                                                                                                                                                                                                                                                                                                                                                                                                                                                                                                                                                                                                                                                                                                                                                                                                                                                                                                                                                                                                                                                                                                                                                                                                                                                                                                                                                                                                                                                                                                                                                                                |
|---------------------------------|----------------------------------------------------------------------------------------------------------------------------------------------------------------------------------------------------------------------------------------------------------------------------------------------------------------------------------------------------------------------------------------------------------------------------------------------------------------------------------------------------------------------------------------------------------------------------------------------------------------------------------------------------------------------------------------------------------------------------------------------------------------------------------------------------------------------------------------------------------------------------------------------------------------------------------------------------------------------------------------------------------------------------------------------------------------------------------------------------------------------------------------------------------------------------------------------------------------------------------------------------------------------------------------------------------------------------------------------------------------------------------------------------------------------------------------------------------------------------------------------------------------------------------------------------------------------------------------------------------------------------------------------------------------------------------------------------------------|
| Journal:                        | <i>BMJ Open</i>                                                                                                                                                                                                                                                                                                                                                                                                                                                                                                                                                                                                                                                                                                                                                                                                                                                                                                                                                                                                                                                                                                                                                                                                                                                                                                                                                                                                                                                                                                                                                                                                                                                                                                |
| Manuscript ID                   | bmjopen-2019-030798.R1                                                                                                                                                                                                                                                                                                                                                                                                                                                                                                                                                                                                                                                                                                                                                                                                                                                                                                                                                                                                                                                                                                                                                                                                                                                                                                                                                                                                                                                                                                                                                                                                                                                                                         |
| Article Type:                   | Cohort profile                                                                                                                                                                                                                                                                                                                                                                                                                                                                                                                                                                                                                                                                                                                                                                                                                                                                                                                                                                                                                                                                                                                                                                                                                                                                                                                                                                                                                                                                                                                                                                                                                                                                                                 |
| Date Submitted by the Author:   | 13-Jun-2019                                                                                                                                                                                                                                                                                                                                                                                                                                                                                                                                                                                                                                                                                                                                                                                                                                                                                                                                                                                                                                                                                                                                                                                                                                                                                                                                                                                                                                                                                                                                                                                                                                                                                                    |
| Complete List of Authors:       | <p>Arnold, Samuel; UNSW, Department of Developmental Disability Neuropsychiatry (3DN); Autism CRC</p> <p>Foley, Kitty-Rose; Southern Cross University - Gold Coast Campus, School of Health and Human Sciences; Autism CRC</p> <p>Hwang, Ye In; UNSW, Department of Developmental Disability Neuropsychiatry (3DN); Autism CRC</p> <p>Richdale, Amanda; La Trobe University, Olga Tennison Autism Research Centre, School of Psychology and Public Health; Autism CRC</p> <p>Uljarevic, Mirko ; Stanford University, Stanford Autism Center, Division of Child and Adolescent Psychiatry, Department of Psychiatry and Behavioral Sciences, School of Medicine; La Trobe University, Olga Tennison Autism Research Centre, School of Psychology and Public Health</p> <p>Lawson, Lauren; La Trobe University, Olga Tennison Autism Research Centre, School of Psychology and Public Health; Autism CRC</p> <p>Cai, Ru; La Trobe University, Olga Tennison Autism Research Centre, School of Psychology and Public Health; Autism CRC</p> <p>Falkmer, Torbjorn; Curtin University, School of Occupational Therapy, Social Work and Speech Pathology; Autism CRC</p> <p>Falkmer, Marita; Curtin University, School of Occupational Therapy, Social Work and Speech Pathology; Autism CRC</p> <p>Lennox, Nick; University of Queensland, Australia, Queensland Centre for Intellectual and Developmental Disability, Mater Research Institute - UQ; Autism CRC</p> <p>Urbanowicz, Anna; RMIT University, Health, Society &amp; Medicine Research Program, Social and Global Studies Centre; Autism CRC</p> <p>Trollor, Julian; UNSW, Department of Developmental Disability Neuropsychiatry (3DN); Autism CRC</p> |
| <b>Primary Subject Heading</b>: | Mental health                                                                                                                                                                                                                                                                                                                                                                                                                                                                                                                                                                                                                                                                                                                                                                                                                                                                                                                                                                                                                                                                                                                                                                                                                                                                                                                                                                                                                                                                                                                                                                                                                                                                                                  |
| Secondary Subject Heading:      | Diagnostics                                                                                                                                                                                                                                                                                                                                                                                                                                                                                                                                                                                                                                                                                                                                                                                                                                                                                                                                                                                                                                                                                                                                                                                                                                                                                                                                                                                                                                                                                                                                                                                                                                                                                                    |
| Keywords:                       | Autism, Longitudinal, Adult                                                                                                                                                                                                                                                                                                                                                                                                                                                                                                                                                                                                                                                                                                                                                                                                                                                                                                                                                                                                                                                                                                                                                                                                                                                                                                                                                                                                                                                                                                                                                                                                                                                                                    |
|                                 |                                                                                                                                                                                                                                                                                                                                                                                                                                                                                                                                                                                                                                                                                                                                                                                                                                                                                                                                                                                                                                                                                                                                                                                                                                                                                                                                                                                                                                                                                                                                                                                                                                                                                                                |

1  
2  
3  
4  
5  
6  
7  
8  
9  
10  
11  
12  
13  
14  
15  
16  
17  
18  
19  
20  
21  
22  
23  
24  
25  
26  
27  
28  
29  
30  
31  
32  
33  
34  
35  
36  
37  
38  
39  
40  
41  
42  
43  
44  
45  
46  
47  
48  
49  
50  
51  
52  
53  
54  
55  
56  
57  
58  
59  
60

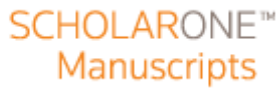

## Title

Cohort profile: The Australian Longitudinal Study of Adults with Autism (ALSAA)

## Author Names and Affiliations

Samuel R. C. Arnold<sup>\*a,b</sup> <samuel.arnold@unsw.edu.au>

Kitty-Rose Foley<sup>\*b,c</sup> <Kitty-Rose.Foley@scu.edu.au>

Ye In (Jane) Hwang<sup>a,b</sup> <jane.hwang@unsw.edu.au>

Amanda L. Richdale<sup>b,d</sup> <A.Richdale@latrobe.edu.au>

Mirko Uljarevic<sup>e,d,b</sup> <mirkoulj@stanford.edu>

Lauren P. Lawson<sup>b,d</sup> <L.Lawson@latrobe.edu.au>

Ru Ying Cai<sup>b,d</sup> <R.Cai@latrobe.edu.au>

Torbjorn Falkmer<sup>b,f</sup> <T.Falkmer@curtin.edu.au>

Marita Falkmer<sup>b,f,g</sup> <Marita.Falkmer@curtin.edu.au>

Nick Lennox<sup>b,h</sup> <n.lennox@uq.edu.au>

Anna Urbanowicz<sup>b,h,i</sup> <a.urbanowicz@rmit.edu.au>

Julian N. Trollor<sup>+a,b</sup> <J.Trollor@unsw.edu.au>

## Affiliations

- a- Department of Developmental Disability Neuropsychiatry (3DN), UNSW Sydney, New South Wales, Australia
- b- Cooperative Research Centre for Living with Autism (Autism CRC), Brisbane, Queensland, Australia
- c- School of Health and Human Sciences, Southern Cross University, Gold Coast, Bilinga, Queensland, Australia
- d- Olga Tennison Autism Research Centre, School of Psychology and Public Health, La Trobe University, Bundoora, Victoria, Australia
- e- Stanford Autism Center, Division of Child and Adolescent Psychiatry, Department of Psychiatry and Behavioral Sciences, School of Medicine, Stanford University.



- 1  
2  
3 f- School of Occupational Therapy, Social Work and Speech Pathology, Curtin  
4 University, Perth, Western Australia, Australia  
5  
6 g- School of Education and Communication, CHILD Programme, Institution of  
7 Disability Research, Jonkoping University, Jonkoping, Sweden  
8  
9 h- Queensland Centre for Intellectual and Developmental Disability, Mater Research  
10 Institute - UQ, The University of Queensland, South Brisbane, Queensland, Australia  
11  
12 i- Health, Society & Medicine Research Program, Social and Global Studies Centre,  
13 RMIT University  
14  
15  
16

17 \*Joint first author

18  
19 +Corresponding author  
20  
21  
22  
23  
24  
25

26 Correspondence concerning this article should be addressed to Prof. Julian Trollor,  
27 Department of Developmental Disability Neuropsychiatry (3DN), 34 Botany St, UNSW  
28 Sydney, 2052, New South Wales, Australia. Telephone: +61-2-9931-9160. Email:  
29 [j.trollor@unsw.edu.au](mailto:j.trollor@unsw.edu.au)  
30  
31  
32  
33  
34  
35  
36  
37  
38  
39  
40  
41  
42  
43  
44  
45  
46  
47  
48  
49  
50  
51  
52  
53  
54  
55  
56  
57  
58  
59  
60

## Abstract (300 Words)

### *Purpose*

There is a significant knowledge gap regarding the lives of adults on the autism spectrum. Some literature suggests significant health and mental health inequalities for autistic adults, yet there is a lack of comprehensive longitudinal studies exploring risk factors. Further, most research does not include the perspective of autistic adults in its conduct or design. Here we describe the baseline characteristics and inclusive research approach of a nationwide longitudinal study.

### *Participants*

The Autism CRC's ALSAA is a questionnaire-based longitudinal study of autistic adults (25+ years old) with follow-up at 2-year intervals. Autistic advisors were involved in each stage of research apart from data analysis. Three questionnaires were developed: self-report, informant report (i.e. proxy report), and carers (i.e. carer experiences and characteristics).

### *Findings to date*

An inclusive research protocol was developed and agreed with autistic advisors. Baseline data were collected from 295 autistic adults ( $M=41.8$  years,  $SD=12.0$ ) including 42 informant responses, 146 comparison participants, and 102 carers. The majority of autistic participants (90%) had been diagnosed in adulthood ( $M=35.3$  years,  $SD=15.1$ ). When compared to controls, autistic adults scored higher on self-report measures of current depression and anxiety. Participant comments informed on-going data gathering. Participants commented on questionnaire length, difficulty with literal interpretation of forced response items, and expressed gratitude for research in this area.

### *Future plans*

1  
2  
3 A large comprehensive dataset relating to autistic adults and their carers has been gathered,  
4  
5 creating a good platform for longitudinal follow-up and collaborative research. Baseline data  
6  
7 confirms poorer mental health of autistic adults. The ALSAA demonstrates a working  
8  
9 approach to inclusive research.  
10  
11  
12  
13  
14  
15  
16  
17  
18  
19  
20  
21  
22  
23  
24  
25  
26  
27  
28  
29  
30  
31  
32  
33  
34  
35  
36  
37  
38  
39  
40  
41  
42  
43  
44  
45  
46  
47  
48  
49  
50  
51  
52  
53  
54  
55  
56  
57  
58  
59  
60

For peer review only

### Strengths and limitations of this study

- Autism related research efforts and funding has typically focused on the period from infancy to mid childhood, this research focuses on autistic adults and their carers.
- The ALSAA uses an inclusive research approach to gather a comprehensive range of measures addressing identified research priorities.
- A large proportion of the ALSAA sample at Time 1 were female, including 50% ( $n=149$ ) of autistic and 80% ( $n=117$ ) of non-autistic participants.
- Participants self-report their autism diagnosis, and a subsample ( $n=32$ ) are not yet formally diagnosed.
- The ALSAA is a unique resource for exploring multiple research questions regarding the lives of Australian autistic adults.

## Introduction

Although autism is a lifelong condition, most autism related research efforts and funding has focused on the period from infancy to mid childhood<sup>1</sup>. The best available evidence suggests an adult population prevalence of at least 1.1%<sup>2</sup>. It is likely that autism is under-recognized or under-diagnosed in adults<sup>3,4</sup>, particularly in women without intellectual disability<sup>2,5</sup>.

Although an emerging body of research explores outcomes and support needs of autistic individuals beyond childhood and adolescence, studies including autistic adults remain frequently focused on younger adults<sup>6-8</sup>. This is reflected in recent commentary from an autistic researcher; “We know virtually nothing about what happens to us, autistic people, physically, cognitively, emotionally and socially as we pass through middle and older age”<sup>9</sup>(p515).

The growing body of evidence suggests higher rates of physical and mental health conditions, increased mortality and higher rates of intellectual disability than in the general population<sup>10</sup>. Autistic adults have higher prevalence of chronic medical conditions, including conditions such as stroke, vision and hearing impairments, and Parkinson’s disease<sup>11-14</sup>. These outcomes are experienced by many autistic adults regardless of intellectual functioning<sup>7</sup>. It has been reported that between 25%-84% of autistic adults have a diagnosed mental health condition, with depression and anxiety the most commonly reported conditions<sup>15-19</sup>. Autistic adults have higher rates of suicide<sup>16,20</sup>, increased mortality and reduced life expectancy<sup>21</sup>. Despite widespread acknowledgement of the comorbidity between autism and intellectual disability, prevalence estimates of intellectual disability in autism and vice versa have been inconsistent<sup>22</sup>. Earlier studies report that between 40 to 70% of those with autism also have an intellectual disability<sup>23-25</sup> though a more recent study reports fewer adults on the autism spectrum as having intellectual disability<sup>2</sup> and intelligence tests may underestimate performance of autistic individuals<sup>26</sup>.

1  
2  
3 Studies investigating outcomes related to daily activities and participation are also scarce<sup>27</sup>.  
4  
5 Available studies report low employment rates<sup>28</sup>, low community inclusion and limited social  
6  
7 relationships for autistic adults<sup>29-33</sup>. A few studies have suggested that factors such as low  
8  
9 childhood IQ, autism severity, psychopathology, social and language development, and  
10  
11 access to services and intervention programs may be determinates of such outcomes <sup>29, 34</sup>;  
12  
13 however, much remains to be understood about the sources of variability in these outcomes.  
14  
15  
16  
17 In general, much of the research remains limited by cross-sectional designs, mixed groups  
18  
19 with and without intellectual disability, and a focus on adults aged under 40 <sup>7, 34-36</sup>.  
20  
21  
22 Longitudinal studies are crucial for exploring changing requirements over time and to inform  
23  
24 services how best to understand the health and wellbeing of autistic adults<sup>9, 37</sup>. Whilst most  
25  
26 studies have focused on one aspect of life or outcomes, such as physical or mental health  
27  
28 comorbidities<sup>12, 15, 38</sup> or quality of life<sup>30, 39</sup>, very few comprehensive evaluations of health,  
29  
30 wellbeing and participation have been conducted<sup>34</sup>. Further, research funding does not match  
31  
32 priorities identified by autistic adults, which include research on public services, improving  
33  
34 life skills and the future for autistic adults<sup>40</sup>.  
35  
36  
37  
38  
39 The majority of existing autism research is also limited by a lack of inclusive research  
40  
41 practices. There is a small but growing body of research on inclusive practices and co-  
42  
43 production in disability research with increasing examples in the autism field<sup>41-43</sup>. In  
44  
45 principle, inclusive research must “address issues that really matter” to people with disability,  
46  
47 “must access and represent their views and experiences” and people “need to be treated with  
48  
49 respect by the research community”<sup>44(p16)</sup>. Inclusive research encompasses a variety of  
50  
51 approaches, from including the individuals with the disability as advisors or consultants, to  
52  
53 working alongside academic researchers, or initiating or conducting the project as researchers  
54  
55 themselves<sup>45</sup>. Due to a history of mistrust between researchers and autism self-advocacy  
56  
57 groups, inclusive methods are especially important in research involving adults on the  
58  
59  
60

1  
2  
3 spectrum<sup>46</sup>. Inclusive approaches ensure scientific findings are meaningful to the autism  
4  
5 community and sensitive to the lived experiences of individuals on the spectrum<sup>47, 48</sup>.  
6  
7

8  
9 The Cooperative Research Centre for Living with Autism (Autism CRC) Australian  
10  
11 Longitudinal Study of Adults with Autism (ALSAA) is Australia's first national longitudinal  
12  
13 study involving autistic adults aged 25 years and older. The ALSAA will contribute needed  
14  
15 longitudinal data across a range of health, functioning and participation domains. Data  
16  
17 gathered aligns with the research gaps identified above, and the priorities identified by  
18  
19 autistic adults<sup>49</sup>. In comparison to current international longitudinal studies of autistic  
20  
21 adults<sup>50-52</sup> the ALSAA gathers a wider range of data points using standardised measures,  
22  
23 gathers data from a community comparison group, and importantly included autistic adults in  
24  
25 study design from the early stages of the project. The ALSAA will contribute to the  
26  
27 validation of several standardised measures for this population. Importantly, the ALSAA  
28  
29 gathers data specific to the unique context and service systems within Australia, pertinent  
30  
31 given the recent introduction of the National Disability Insurance Scheme (NDIS) and the  
32  
33 considerable differences in approaches to healthcare and disability across countries. The  
34  
35 ALSAA primarily aims to identify and comprehensively describe the profiles of Australian  
36  
37 autistic adults and to compare them to a control group. Longitudinal data will further allow  
38  
39 the determination of predictors versus correlates across a range of outcomes. The aims of this  
40  
41 paper are to describe the methodological processes and the inclusive protocol adopted in the  
42  
43 ALSAA, as well as to present participant characteristics and feedback from the baseline data  
44  
45 collection.  
46  
47  
48  
49  
50  
51  
52

## 53 **Cohort Description**

### 54 *Design*

55  
56  
57  
58  
59  
60

1  
2  
3 The ALSAA is a questionnaire-based, prospective, longitudinal cohort study with a planned  
4  
5 2-year follow-up and further follow-ups as resources allow. Initial design and development of  
6  
7 the ALSAA occurred in collaboration with researchers and clinical health professionals  
8  
9 across Australia, including close collaboration with the Autism CRC longitudinal Study of  
10  
11 Australian School Leavers with Autism (SASLA)<sup>53</sup>. Brief consultation also occurred with  
12  
13 international experts and researchers conducting similar longitudinal studies. Additionally,  
14  
15 preliminary work on factors influencing the research participation of autistic adults<sup>54</sup>  
16  
17 influenced the ALSAA design, including ensuring opportunities for participants to clarify  
18  
19 questions, receive regular study newsletters, and space for participants to provide  
20  
21 explanations regarding their responses.  
22  
23  
24  
25  
26  
27  
28  
29

### 30 *Patient and Public Involvement*

31  
32  
33 *How was the development of the research question and outcome measures informed by*  
34  
35 *patients' priorities, experience, and preferences?*  
36  
37

38  
39 The ALSAA was developed with input from a research advisory network, initially consisting  
40  
41 of 6 autistic adults and 2 family members/carers of autistic adults who helped develop the  
42  
43 surveys to ensure the questions were relevant, accessible and valid.  
44  
45

46  
47 *How did you involve patients in the design of this study?*  
48

49  
50 The ALSAA Inclusive Research Protocol was developed based on the principles of inclusive  
51  
52 research<sup>55</sup>, the Autism CRC report *Inclusive Research Practice Guides and Checklists for*  
53  
54 *Autism Research*<sup>56</sup> (e.g. Checklist 3: Practices that Support Inclusion of Individuals on the  
55  
56 Autism Spectrum in Advisory and Reference Groups), and procedures similar to those  
57  
58  
59  
60



1  
2  
3 employed by Nicolaidis and colleagues<sup>57</sup> (e.g. choosing research questions, adapting data  
4 collection instruments, interpreting results) (see Table 1).  
5  
6  
7

8 *Were patients involved in the recruitment to and conduct of the study?*  
9

10  
11 Since the commencement of the ALSAA, this inclusive research protocol has been reviewed  
12 by seven of the autistic advisors and one carer advisor and has guided the interactions  
13 between researchers and advisors in the development of baseline outputs and the 2-year  
14 follow-up design. Specifically, in the design stage of the ALSAA, members of the advisory  
15 network were asked to identify ambiguous or inappropriate language, formatting issues and  
16 measures which they thought may be interpreted inappropriately or differently due to poor  
17 clarity or wording. An expanded group of eleven advisors had greater input in designing the  
18 2-year follow-up, including the selection of focus topic areas. As per the protocol advisors are  
19 given forewarning, then one month to respond to most requests from the research team, with  
20 more response time as needed. Advisors have provided feedback on ongoing research outputs  
21 critiquing interpretations of findings suggested by the researchers, with compensation more  
22 recently available for advisors' time. Advisors to date have not been involved in data  
23 analysis, though several co-produced peer-research projects are currently underway.  
24  
25 Advisors have also assisted in promoting recruitment materials particularly through social  
26 media.  
27  
28  
29  
30  
31  
32  
33  
34  
35  
36  
37  
38  
39  
40  
41  
42  
43  
44  
45  
46

47 *How will the results be disseminated to study participants?*  
48

49  
50 The ALSAA sends quarterly newsletters to all participants.  
51  
52

53 **[Insert Table 1 here]**  
54  
55

56 *Participants*  
57  
58  
59  
60

1  
2  
3 There are three participant groups in the ALSAA: autistic adults, non-autistic general  
4 community comparison controls, and carers of autistic adults. Inclusion criteria required the  
5 control and autistic participants to be aged 25 years or older, live in Australia and have  
6 sufficient English literacy skills to complete the survey, determined during a screening phone  
7 call or online expression of interest (EOI). If an autistic individual was unable or preferred  
8 not to self-report, they were given the option to ask an informant to complete an informant  
9 version of the survey on their behalf. People with intellectual disability could complete the  
10 self-report survey with support or participate via an informant respondent.  
11  
12  
13  
14  
15  
16  
17  
18  
19  
20  
21

22 Informant respondents and carers needed to be 18 years or older, have sufficient English  
23 literacy skills, live in Australia and be able to report on the life of the autistic person. The  
24 content of the informant survey is slightly different to the self-report survey (see Table 2) due  
25 to some measures, such as the Patient Health Questionnaire-9 (PHQ-9)<sup>58</sup>, having no  
26 informant version available. Carers, including family members and support people for the  
27 ALSAA, were defined as people who provided unpaid care and support to either a family  
28 member (including spouse) or friend who in on the autism spectrum. This is based on the  
29 widely accepted definition proposed by Carers Australia  
30  
31  
32  
33  
34  
35  
36  
37  
38  
39  
40  
41 (<http://www.carersaustralia.com.au/about-carers/>).  
42  
43

#### 44 *Survey*

45  
46  
47 Three versions of the survey were developed: 1) self-report, for autistic adults and non-  
48 autistic controls, 2) informant, for carers/support people to complete about the autistic person  
49 who is unable to, or does not want to self-complete, and 3) carer survey for carers/support  
50 people/family members to complete about their own health and wellbeing. Surveys could be  
51 completed via a paper copy or online. The paper copy was also available in large print. The  
52 surveys involved a comprehensive range of measures (see Table 2). In selecting measures,  
53  
54  
55  
56  
57  
58  
59  
60

1  
2  
3 preference was given to measures that had established validity with people on the spectrum  
4  
5 and to those deemed suitable by the autistic advisors.  
6  
7

8 **[Insert Table 2 here]**  
9

10  
11 Each survey also contained closing feedback items, asking if any questions were confusing,  
12  
13 difficult, or upsetting, and any additional topics that should be included. It also asked how  
14  
15 long the survey took to complete (open-ended response), and an overall satisfaction with the  
16  
17 survey rated on a 5-point Likert scale. A final item asked for any further feedback.  
18  
19

## 20 21 22 *Procedure*

### 23 24 25 *Piloting*

26  
27  
28 Four autistic adults piloted the self-report questionnaire and two caregivers piloted the carer  
29  
30 and the informant questionnaires. Volunteers received two copies, one copy to complete, with  
31  
32 data recorded where possible in the ALSAA dataset, and the other for their feedback.  
33  
34

35 Considerable changes to each version of the survey were undertaken in response to feedback  
36  
37 from the autistic advisors and volunteers, including removing the Communication Checklist –  
38  
39 Adult<sup>59</sup>, formatting changes and changes to item wordings where the item did not belong to  
40  
41 an existing standardised tool.  
42  
43

### 44 45 *Recruitment and Follow-up*

46  
47  
48 A recruitment target of 160 autistic adults was set to allow for regression analyses using  
49  
50 multiple predictor variables. Power analyses, undertaken using power calculation software,  
51  
52 suggested this would be a sufficient sample size with power  $(1 - \beta)$  set at .80 and  $\alpha = .05$  to  
53  
54 detect a Cohen's  $f^2$  effect size estimate of at least .1 using multiple regression models with 7  
55  
56 predictors. Participants were recruited via advertisements through autism-specific  
57  
58 organisations, disability organisations, autism self-advocacy groups, employment services,  
59  
60

1  
2  
3 universities, Technical and Further Education (TAFE) institutes, psychology and allied health  
4 private practices, carer organisations, and online autism communities. In attempts to gather a  
5 sample more closely matched to Australian population estimates<sup>60</sup>, additional recruitment  
6 activities targeted adults on the spectrum with intellectual disability, and males without  
7 autism. General community members, autistic adults and carers of autistic adults who were  
8 willing to participate in the ALSAA contacted the research team based at The University of  
9 New South Wales (UNSW Sydney) via telephone, email or through completing a short online  
10 EOI. After eligibility screening, their details were added to the participant database and they  
11 were mailed a paper copy or emailed a link to their survey depending on their preference.  
12  
13  
14  
15  
16  
17  
18  
19  
20  
21  
22  
23

24  
25 Due to a high number of responses and advice from autistic advisors, participants who self-  
26 identified as being autistic, but did not have a formal diagnosis, representing the hidden  
27 population and ‘lost generation’<sup>3</sup> of autistic adults, were also recruited. Formally diagnosed  
28 participants were asked to provide details of their diagnosis, year of diagnosis, and the  
29 discipline and name of the practitioner(s) who diagnosed them. AQ-short cut-off scores (>65,  
30 sensitivity .97, specificity .82)<sup>61</sup> also support diagnostic status. At the planned two-year  
31 average Time 2 follow-up copies of participants’ diagnostic reports will be requested, with a  
32 project undertaken to review and categorise the reports. From November 2017 through 2019  
33 participants are being recontacted using contact details provided and considering their  
34 communication preferences that were recorded.  
35  
36  
37  
38  
39  
40  
41  
42  
43  
44  
45  
46  
47

### 48 *Ethical Considerations*

49  
50  
51 Participants were supplied with the appropriate Participant Information Statement and  
52 Consent Form (PISCF). For the online survey, participants were asked to confirm their  
53 consent at commencement, marking checkboxes prior to proceeding. Consent was inferred  
54 from participants who completed and returned paper copies of the survey, as outlined in their  
55  
56  
57  
58  
59  
60

1  
2  
3 PISCF. In the case where the autistic adult had an intellectual disability a checklist for  
4 capacity to provide consent was used. This checklist was completed by the carer/next of kin;  
5  
6 it was adapted from a checklist developed for use in the Study of Ageing in Intellectual  
7  
8 Disability (SAGE)<sup>62</sup>. The checklist asks several question relating to the person's ability to  
9  
10 understand the study, benefits and risks, withdrawal and complaints, to determine if a person  
11  
12 responsible consent should be obtained additionally or separately. The study was approved by  
13  
14 the Human Research Ethics Committee at UNSW Sydney, Australia (No. HC15001).  
15  
16  
17  
18  
19

### 20 *Data storage*

21  
22  
23 Online questionnaire data were entered directly by participants into Qualtrics Online Survey  
24  
25 Software (<https://www.qualtrics.com/>), whereas returned paper copy surveys were entered  
26  
27 into Qualtrics by a researcher or research assistant. Data from Qualtrics, re-identifiable by  
28  
29 participation code, were stored on password-protected UNSW Sydney servers. Recently,  
30  
31 ethics approval for establishment of a databank for the ALSAA data, to allow collaboration  
32  
33 with external researchers has been obtained.  
34  
35  
36  
37

### 38 *Statistical analysis*

39  
40  
41 STATA Statistical Analysis Software 14<sup>63</sup> and IBM SPSS Statistics 22<sup>64</sup> were used for  
42  
43 cleaning, coding, and statistical analyses. For the current manuscript, STATA was used to  
44  
45 obtain descriptive statistics regarding recruitment, participant feedback, and participant  
46  
47 characteristics, with the level of significance <.05. Family-wise alpha was not adjusted due to  
48  
49 the possibility of reducing probability of detecting true positive results<sup>65</sup>. For describing this  
50  
51 cohort profile, listwise deletion was used for specific analyses when data were missing  
52  
53 completely at random, after checking for difference in demographics and AQ score for  
54  
55 dropped participants where appropriate. Subsample sizes are noted throughout.  
56  
57  
58  
59  
60

### *Recruitment statistics*

Recruitment commenced in July 2015. At the close of Time 1 data gathering in November 2017, 345 autistic adults, 221 non-autistic adults, 185 carers, and 78 informants had registered their interest in the study. Of these, 237 autistic adults, 130 non-autistic adults, 100 carers, and 42 informant reporters completed the entire survey. Overall, a total of 295 autistic adults participated including all survey formats and partial survey completions. A small proportion of participants were deemed ineligible during screening (see Table 3), generally due to being under 25 years, not caring for an adult aged 25+ years old, or being located outside of Australia. Participants were recorded as partial completions if at close of Time 1 their surveys contained the initial demographic items completed and some additional useable data. From available data there was no significant difference in gender,  $\chi^2(4, n=337) = 1.07$ ,  $p=.898$ , or approximate age [ $F(4, 4) = 2.04$ ,  $p=.09$ ] based on survey commencement, eligibility or completion status for the autistic adults. These non-significant results were also found for the non-autistic adults across gender,  $\chi^2(4, n=215) = 6.98$ ,  $p=.137$ , and age [ $F(4, 4) = 0.96$ ,  $p=.43$ ].

**[Insert Table 3 here]**

### *Time taken to complete, and satisfaction with, the survey*

Participants reported varying times taken to complete the entire survey. Self-reporting autistic participants reported between 20 minutes and 12 hours to complete with an average time of 156 minutes ( $n=164$ ,  $SD=111$ ), though several responses ( $n=53$ ) were not easily convertible to numeric values for analysis, for example “few days”, “no idea”, or no response to the item ( $n=36$ ). Non-autistic, self-reporting participants reported a range of 20 minutes to 5 hours

1  
2  
3 with an average time of 106 minutes ( $n=98$ ,  $SD=74$ ). This was significantly less than self-  
4 reporting autistic adults despite their completing almost all the same measures and domains,  
5  
6  $t(260)=-4.94$ ,  $p<.001$ . Carers took 75 minutes on average ( $n=81$ ,  $SD=62$ ) and informant  
7  
8 responders took 103 minutes on average ( $n=27$ ,  $SD=54$ ) to complete surveys. The majority of  
9  
10 participants (64%,  $n=482$ ) reported that they were satisfied or very satisfied with the survey;  
11  
12 few participants were dissatisfied (6%) (Figure 1). There was no association between time  
13  
14 taken to complete the self-report survey and level of satisfaction ( $n=262$ ,  $r_s = .10$ ,  $p=.09$ ), and  
15  
16 no difference in satisfaction based on survey type,  $X^2(9, n=482) = 11.2$ ,  $p=.26$ .  
17  
18  
19  
20  
21

22 **[Insert Figure 1 here]**  
23

24  
25 The most common negative feedback related to the length of surveys, or to difficulty with  
26  
27 literal interpretations of forced response items where participants felt the options provided did  
28  
29 not match their circumstances. Several participants provided feedback that they were grateful  
30  
31 for research in this area. Additional topics of interest were suggested, as well as the potential  
32  
33 removal of some questionnaires (e.g., the Brief COPE). Revision of items referring to social  
34  
35 supports was suggested, as some participants found these upsetting.  
36  
37  
38  
39

#### 40 *Summary of participant characteristics*

41

42  
43 The age of autistic participants ranged from 25 to 80 years, with a high proportion of females  
44  
45 (50%,  $n=295$ ) across all autistic samples. Across all autistic participants 25% were married  
46  
47 and 36% were living as a couple. Over half (57%,  $n=42$ ) of the informant report sample lived  
48  
49 with their parents (see Table 4), in contrast to self-reporting autistic adults who most  
50  
51 frequently lived as a couple (45%,  $n=295$ ) or alone (26%,  $n=295$ ). Self-reporting autistic  
52  
53 adults did not differ to control participants on rural / remoteness according to Australian  
54  
55 Statistical Geography Standard-Remoteness Area (ASGS-RA) classification,  $X^2(4, n=378) =$   
56  
57 9.36,  $p=.05$  ( $n=21$  missing). They were more likely to have greater socioeconomic  
58  
59  
60

1  
2  
3 disadvantage according to the postcode-based Socioeconomic Index for Areas (SEIFA)  
4  
5 decile,  $t(376)=2.96, p<.01$  ( $n=21$  missing, NB. SEIFA / rurality not available for all  
6  
7 postcodes), though were still above average compared to the Australian population. Time 2  
8  
9 data gathering will seek to gather household income data to more accurately determine  
10  
11 socioeconomic disadvantage.  
12  
13

14  
15 Of the formally diagnosed autistic adults ( $n=221$ ), 132 (56%) reported they have a diagnostic  
16  
17 report available, with 169 (76%) diagnosed by one clinician and 29 (13%) reporting diagnosis  
18  
19 by two or more clinician ( $n=23$  missing). As shown in Table 5, the majority (97%,  $n=295$ ) of  
20  
21 all autistic participants met the AQ-Short cut-off for identifying autism, compared to 30%  
22  
23 ( $n=60$ ) of biologically related carers and 22% ( $n=137$ ) of non-autistic control participants.  
24  
25

26  
27 Asperger's syndrome was the most frequently reported formal diagnosis. Self-report,  
28  
29 formally diagnosed autistic participants on average were diagnosed 6.9 years prior to survey  
30  
31 completion, and the majority (90%;  $n=217, 4$  missing) received their diagnosis in adulthood.  
32  
33

34  
35 A preliminary analysis of gender differences for self-reporting autistic adults was also  
36  
37 conducted. In comparison to males, self-reporting formally diagnosed females did not differ  
38  
39 significantly on age of diagnosis  $t(192)=.39, p=.70$  ( $n=4$  missing). Comparing males with  
40  
41 females, including non-diagnosed autistic adults, there was no difference in number of  
42  
43 individuals currently married or in a defacto relationship,  $X^2(1, n=241) = .8, p=.38$ , or in their  
44  
45 educational status,  $X^2(2, n=241) = 4.66, p=.10$ . Females were significantly different regarding  
46  
47 employment status  $X^2(4, n=241) = 18.77, p=.001$ , though only relating to the number  
48  
49 providing homecare ( $n=19$  female vs.  $n=1$  male, see Table 4).  
50  
51

52  
53 In the non-autistic control sample, participant ages ranged from 25 to 79 years, with a high  
54  
55 proportion (80%,  $n=146$ ) of females. The majority lived as a couple (72%) and were married  
56  
57 (62%). The control sample was significantly different to the self-reporting autistic adults  
58  
59 (with and without a formal diagnosis) on several demographics including gender,  $X^2(2,$   
60



1  
2  
3  $n=399$ ) = 26.5,  $p<.001$ , living situation,  $X^2(5, n=399) = 33.2, p<.001$ , marital status,  $X^2(8,$   
4  
5  $n=398) = 47.1, p<.001$  ( $n=1$  missing), employment status,  $X^2(6, n=367) = 18.3, p=.005$  ( $n=32$   
6  
7 missing), and higher education status,  $X^2(2, n=399) = 22.4, p<.001$ . The control sample was  
8  
9 also significantly less likely to meet the DSM-IV-TR linked PHQ-9 cut-off for depression,  
10  
11  $X^2(1, n=354) = 54.9, p<.001$  ( $n=45$  missing), less likely meet the DSM5 GAD-A cut-off<sup>66</sup> for  
12  
13 anxiety,  $X^2(1, n=366) = 67.8, p<.001$  ( $n=33$  missing), and less likely to have a history of  
14  
15 psychiatric illness,  $X^2(1, n=384) = 82.1, p<.001$  ( $n=15$  missing), compared to self-reporting  
16  
17 autistic adults. There were no significant differences for self-reporting autistic adults missing  
18  
19 data on the PHQ-9 or DSM5 GAD-A based on age, gender or AQ score.  
20  
21  
22  
23

24  
25 As shown in Table 6, the majority (43%;  $n=98, 4$  missing) of carers were mothers of an  
26  
27 autistic adult, followed by partners or spouses (23%). Carers' ages ranged from 21 to 78  
28  
29 years. The majority were female (83%,  $n=102$ ), married (66%), and living as a couple (75%).  
30  
31 Carers spent an average 63.4 ( $SD=57.80, n=92$ ) hours per week with the adult with autism,  
32  
33 and the average age of the autistic adult cared for was 37.5 years (range 25-96 years,  
34  
35  $SD=13.21$ ). The majority of carer participants (76%,  $n=102$ ) are linked to a self-report or  
36  
37 informant-report responses.  
38  
39  
40

41 [insert Table 4 here]

42 [insert Table 5 here]

43 [insert Table 6 here]

## 44 45 46 47 48 49 50 51 Findings to date

52  
53 Using an inclusive research approach, the ALSAA has collected a detailed profile of the  
54  
55 physical and mental health, productivity, wellbeing and health service use of autistic adults  
56  
57 aged 25+ years, and their carers, living in Australia. There were high numbers of recruitment  
58  
59  
60

1  
2  
3 responses across the four Time 1 survey populations (autistic and control adult self-report,  
4 informant report on autistic adults, carer self-report). The ALSAA Time 1 data has been used  
5 in several studies of psychotropic medication use<sup>67</sup>, leisure participation<sup>68</sup>, ageing well<sup>69</sup>,  
6 loneliness<sup>70</sup> and employment<sup>71</sup>. ALSAA and SASLA pooled data has been used to explore  
7 cognitive reappraisal<sup>72</sup>, suicidal ideation<sup>73</sup>, psychometric scale validation<sup>74</sup>, anxiety and  
8 depression<sup>75</sup>. Several other outputs are in development, with focus on health service barriers  
9 and usage, caregivers, impact of diagnosis in adulthood, further scale validations,  
10 longitudinal analyses of loneliness, suicidal ideation, mental illness risk factors among others,  
11 meeting the broad aim of the study to describe and compare the profiles of Australian autistic  
12 adults.  
13  
14  
15  
16  
17  
18  
19  
20  
21  
22  
23  
24  
25  
26

### 27 *Participant characteristics*

28  
29  
30 A large number of females on the spectrum ( $n=150$ ) have participated in the ALSAA. This  
31 will provide an opportunity to explore the different expression of autism characteristics in  
32 females without intellectual disability<sup>5, 76</sup>. Similar to findings in other studies<sup>10, 32</sup>, self-  
33 reporting autistic adults had high rates of depression (52%), anxiety (55%), and a frequent  
34 history of psychiatric diagnosis (89%), significantly more than the control sample. They were  
35 less likely to be employed and less likely to have a university education compared with the  
36 control sample.  
37  
38  
39  
40  
41  
42  
43  
44  
45  
46  
47

### 48 *Questionnaire feedback and completion*

49  
50 The length of the surveys may have led to some participants not completing following  
51 registration, or to missing data or only partial completions. Longer survey length has been  
52 linked to lower participation and completion of web-based surveys<sup>77, 78</sup>. Despite emphasising  
53 the ability to complete over several sessions, some participants commented that the survey  
54 was “too long”. In contrast, survey length was not identified as an issue during pilot testing,  
55  
56  
57  
58  
59  
60

1  
2  
3 time to complete was not related to survey satisfaction, and some participants appreciated the  
4 comprehensive nature of the surveys. Suggestions made in questionnaire feedback will be  
5  
6 incorporated in the design of the 2-year follow up. Follow-up design aims to reduce  
7  
8 assessment burden by reducing overall survey length and where appropriate pre-filling  
9  
10 repeated measures such as medical history. Additional areas of interest to the community will  
11  
12 be explored including bullying, relationships and terms used to describe individuals with an  
13  
14 autism spectrum diagnosis.  
15  
16  
17  
18  
19

### 20 **Strengths and limitations**

21  
22  
23 An important strength of the study was the inclusive research approach using autistic  
24  
25 advisors. Frequently missing from autism research and other longitudinal studies, an  
26  
27 inclusive research protocol was developed for the ALSAA in consultation with autistic  
28  
29 advisors (see Table 1) and applied across all stages of the research process apart from the  
30  
31 analysis. Inclusive research has been found to increase the likelihood that findings are  
32  
33 translatable to the real world and focused on areas of need from community perspectives<sup>44</sup>.  
34  
35 Best-practise processes of conducting inclusive research with autistic adults are not well  
36  
37 known, though more resources are becoming available<sup>79</sup> The ALSAA has engaged peer  
38  
39 researchers in some future outputs. An additional strength of the ALSAA design is its  
40  
41 consideration and partial overlap with several other national and international studies, for  
42  
43 example overlap with the Autism CRC SASLA longitudinal study allows for a lifespan  
44  
45 approach to be taken including data from late adolescence<sup>72</sup>.  
46  
47  
48  
49  
50  
51  
52  
53  
54

55 The ALSAA baseline sample is reflective of the convenience sampling methodology used.  
56  
57 Participants would appear non-representative of the Australian autism population given  
58  
59 approximate postcode-based above average socioeconomic status, a large female gender bias  
60

1  
2  
3 for both autistic adults and controls, and that the majority of the autistic sample does not have  
4 an intellectual disability. Earlier epidemiological estimates of autism<sup>23</sup> would suggest a larger  
5 proportion of people with a diagnosis of autism and intellectual disability and a much higher  
6 male to female ratio, though recent work questions these assumptions<sup>2, 80</sup>. Self-selection in  
7 online surveys can lead to a female gender bias<sup>78</sup>, as also has been noted in other online  
8 autism research<sup>81-83</sup>. Commonly reported as a 4 to 1 male bias<sup>84</sup>, there is suggestion the true  
9 autism gender ratio may be closer to 3 to 1<sup>80</sup> or lower<sup>76</sup> as females with autism are at a higher  
10 risk of being underdiagnosed<sup>3</sup>. Limiting recruitment to participants age 25 years or older,  
11 changing diagnostic practices<sup>85</sup>, in combination with the convenience sampling, has likely led  
12 to the large percentage of participants who had received their autism diagnosis in adulthood.  
13  
14  
15  
16  
17  
18  
19  
20  
21  
22  
23  
24  
25  
26

27 The majority of the current autistic sample does not have an intellectual disability. Significant  
28 barriers exist for people with intellectual disability to participate in a questionnaire-based  
29 study<sup>86</sup>. An alternative to directly gathering information from adults on the spectrum with  
30 intellectual disability is the participation via an informant respondent. Although an informant  
31 respondent survey was made available for the ALSAA, and despite targeted recruitment  
32 efforts, there was low participation of people with intellectual disability.  
33  
34  
35  
36  
37  
38  
39  
40

41 A final limitation is the self-report questionnaire format of the ALSAA, particularly in  
42 relation to self-reported diagnosis of autism and comorbid conditions without clinical  
43 reassessment. Validating autism diagnosis through clinical reassessment would be a highly  
44 resource intensive exercise in a nationwide study in Australia and is beyond the resourcing  
45 available to the study. This is offset by gathering of additional information relating to autism  
46 diagnosis, including asking if the respondent has a diagnostic report, name and type of  
47 clinician providing diagnosis, and AQ scores. These variables could be used to identify  
48 subsamples with stronger evidence of definite diagnosis of autism for separate analysis where  
49 necessary depending on the specific research question. Further, diagnostic reports from  
50  
51  
52  
53  
54  
55  
56  
57  
58  
59  
60

1  
2  
3 participants will be requested from participants at follow-up to confirm diagnosis. Gathering  
4 data from adults without a formal diagnosis is potentially a strength, given the ‘lost  
5 generation’ of autistic adults<sup>3</sup>, significant barriers to diagnosis, and accuracy issues with gold  
6 standard autism assessment tools<sup>87</sup>; these participants could be overlooked in other studies  
7 though they represent an important hidden population group. The self-report format also  
8 prevents the quantification of participants’ cognitive ability. The use of standardised mental  
9 health screening measures with clinical cut-offs gathers some information on co-occurring  
10 mental health conditions, though not as reliably as would be available via clinical interview.  
11 Conversely, community-based sampling and use of self-report questionnaires does allow for  
12 gathering a reasonably large sample, offsetting the risk of including people with incorrect  
13 diagnostic data with increased statistical power and the potential severity bias of clinical  
14 samples. Limitations and strengths of the ALSAA study design will largely depend on the  
15 specific research question being explored, with sufficient sample size and data points to  
16 partial-out subgroups and non-matched controls or to account for common method variance  
17 as needed.

### 38 *Implications*

39  
40  
41 There is a significant knowledge gap regarding the lives of autistic adults. The ALSAA has  
42 gathered a large comprehensive dataset relating to autistic adults and their carers, creating a  
43 platform for longitudinal follow-up and collaborative research. The ALSAA is an important  
44 resource for exploring multiple research questions regarding the lives of autistic adults.

45  
46 However, as with all longitudinal research caution is required in drawing firm conclusions  
47 from the ALSAA cohort in relation to the entire Australian autism population. Nevertheless,  
48 this cohort provides the first opportunity to explore longitudinal outcomes of Australian  
49 autistic adults. Having offline and informant versions of questionnaires, and questionnaires  
50  
51  
52  
53  
54  
55  
56  
57  
58  
59  
60

1  
2  
3 reviewed by autistic advisors, facilitates greater accessibility for participants on the spectrum  
4  
5 and their carers.  
6

7  
8 The ALSAA study demonstrates a working approach to inclusive research with autistic  
9  
10 advisors. The inclusive research protocol developed in this study provides a useful basis for  
11  
12 other research endeavours. Following this protocol, future outputs such as peer-reviewed  
13  
14 manuscripts, presentations and reports from the ALSAA will also be developed in  
15  
16 consultation with autistic advisors or autistic peer researchers. Input from autistic advisors  
17  
18 has already improved the quality and relevance of initial outputs<sup>67</sup>, for example identifying  
19  
20 potential alternative interpretations of findings based on lived experiences, potential  
21  
22 differences in autistic interpretations of scale items, and modifying the methodology in one  
23  
24 instance<sup>70</sup> changing a purely quantitative study into a mixed methods design.  
25  
26  
27  
28  
29

30 Some measures used in the ALSAA have not yet been validated with autistic adult samples  
31  
32 (e.g., DSM5 GAD-A, Emotion Regulation Questionnaire, PHQ-15). The ALSAA provides  
33  
34 the opportunity to explore the validity of these commonly used measures”  
35  
36  
37

### 38 **Collaboration**

39  
40 International studies involving autistic adults and utilising standardised measures are  
41  
42 underway in the United States, Netherlands and United Kingdom (e.g., SPARK  
43  
44 <http://sparkforautism.org>, AASPIRE <https://aaspire.org/>, the Netherlands Autism Register  
45  
46 <https://www.nederlandsautismeregister.nl> and the Adult Autism Spectrum Cohort-UK  
47  
48 <http://research.ncl.ac.uk/adultautismspectrum/>), though with less comprehensive ranges of  
49  
50 measures. During development of the ALSAA, consultation with international groups  
51  
52 occurred to ensure there were some synergies with these studies. Future international  
53  
54 comparisons will be possible, including pooling of data. This will allow for the creation of  
55  
56 much larger datasets and more in-depth understanding of life in adulthood for autistic people.  
57  
58  
59  
60

## Further details

### Contributors

Manuscript drafting was jointly led by SA & KF. All authors (YH,AR,MU,LL,RC,TF,MF,NL,AU,JT) had a role in the conduct of the research, interpretation of results, drafting of manuscript and critical review of the manuscript. SA, KF, YH, AR, MU & JT conducted data analysis and reporting. KF, YH, AR, MU, RC, TF, MF, NL, AU & JT were involved in the conceptualisation of the study.

### Data Sharing Statement

Processes to establish data banking and sharing procedures are currently being finalised. Please email the corresponding author regarding queries.

### Ethics approval

The study was approved by the Human Research Ethics Committee at UNSW Sydney, Australia (No. HC15001).

### Acknowledgements

The authors also acknowledge the valuable contribution of the Research Advisory Network members Matthew Bennett, Bob Boyce, Jen Harland, Julianne Higgins, Gabriel Nakhel, Joanne Mahony, Andrea Michael, Cheryl Strangio, and Chris Tanner whose insight and recommendations shaped this work. We also gratefully acknowledge the cooperation and participation of all participants on the autism spectrum and their carers involved in this study.

## **Funding**

This work was supported by the Cooperative Research Centre for Living with Autism (Autism CRC), established and supported under the Australian Government's Cooperative Research Centres Program.

## **Conflict of Interest**

The authors have no conflict of interest to report.



## References

1. Seltzer MM, Shattuck PT, Abbeduto L, Greenberg JS. Trajectory of development in adolescents and adults with autism. *Mental Retardation and Developmental Disabilities*. 2004;10:234-47.
2. Brugha TS, Spiers N, Bankart J, Cooper S-A, McManus S, Scott FJ, et al. Epidemiology of autism in adults across age groups and ability levels. *The British Journal of Psychiatry*. 2016/12/01/;209(6):498-503. en.
3. Lai M-C, Baron-Cohen S. Identifying the lost generation of adults with autism spectrum conditions. *The Lancet Psychiatry*. 2015 2015/11/01/;2(11):1013-27.
4. Van Wijngaarden-Cremers PJM, van Eeten E, Groen WB, Van Deurzen PA, Oosterling IJ, Van der Gaag RJ. Gender and Age Differences in the Core Triad of Impairments in Autism Spectrum Disorders: A Systematic Review and Meta-analysis. *Journal of Autism and Developmental Disorders*. 2014 March 01;44(3):627-35.
5. Bargiela S, Steward R, Mandy W. The Experiences of Late-diagnosed Women with Autism Spectrum Conditions: An Investigation of the Female Autism Phenotype. *Journal of Autism and Developmental Disorders*. 2016 2016/10/01/;46(10):3281-94. en.
6. Jang J, Matson JL, Adams HL, Konst MJ, Cervantes PE, Goldin RL. What are the ages of persons studied in autism research: A 20-year review. *Research in Autism Spectrum Disorders*. 2014;8(12):1756-60.
7. Howlin P, Moss P. Adults with autism spectrum disorders. *Canadian Journal of Psychiatry*. 2012;57(5):275-83.
8. Nicolaidis C. Autism in Adulthood: The New Home for Our Emerging Field. *Autism in Adulthood*. 2018;1(1):1-2.
9. Michael C. Why we need research about autism and ageing. *Autism*. 2016;20(5):515-6.
10. Howlin P, Magiati I. Autism spectrum disorder: outcomes in adulthood. *Current Opinion in Psychiatry*. 2017 2017/03//;30(2):69-76. en.
11. Cashin A, Buckley T, Trollor J, Lennox N. A scoping review of what is known of the physical health of adults with autism spectrum disorder. *Journal of Intellectual Disabilities*. 2016.
12. Croen LA, Zerbo O, Qian Y, Massolo M, Rich S, Sidney S, et al. The health status of adults on the autism spectrum. *Autism*. 2015;19(7):814-23.
13. Jones KB, Cottle K, Bakian A, Farley M, Bilder D, Coon H, et al. A description of medical conditions in adults with autism spectrum disorder: a follow-up of the 1980s Utah/UCLA autism epidemiologic study. *Autism*. 2016;5:551-61.
14. Weiss JA, Riosa PB. Thriving in youth with autism spectrum disorder and intellectual disability. *Journal of Autism and Developmental Disorders*. 2015;45:2474-86.
15. Buck TR, Viskochil J, Farley M, Coon H, McMahon WM, Morgan J, et al. Psychiatric comorbidity and medication use in adults with autism spectrum disorder. *Journal of Autism and Developmental Disorders*. 2014;44:3063-71.
16. Hedley D, Uljarević M, Wilmot M, Richdale A, Dissanayake C. Understanding depression and thoughts of self-harm in autism: A potential mechanism involving loneliness. *Research in Autism Spectrum Disorders*. 2018 2018/02/01/;46:1-7.
17. Lever AG, Geurts HM. Psychiatric co-occurring symptoms and disorders in young, middle-aged, and older adults with autism spectrum disorders. *Journal of Autism and Developmental Disorders*. 2016;46:1916-30.
18. Matson JL, Williams LW. Depression and mood disorders among persons with Autism spectrum disorders. *Research in Developmental Disabilities*. 2014;35:2003-7.
19. Moss P, Howlin P, Savage S, Bolton P, Rutter M. Self and informant reports of mental health difficulties among adults with autism findings from a long-term follow-up study. *Autism*. 2015.
20. Hedley D, Uljarević M, Wilmot M, Richdale A, Dissanayake C. Brief Report: Social Support, Depression and Suicidal Ideation in Adults with Autism Spectrum Disorder. *Journal of Autism and Developmental Disorders*. 2017 November 01;47(11):3669-77.

21. Hirvikoski T, Mittendorfer-Rutz E, Boman M, Larsson H, Lichtenstein P, Bolte S. Premature mortality in autism spectrum disorder. *The British Journal of Psychiatry*. 2015.
22. Matson JL, Nebel-Schwalm N. Comorbid psychopathology with autism spectrum disorder in children: an overview. *Research in Developmental Disabilities*. 2007;28:341-52.
23. Fombonne E. Epidemiology surveys of autism and other pervasive developmental disorders: an update. *Journal of Autism and Developmental Disorders*. 2003;33(4):365-82.
24. LaMalfa G, Lassi G, Bertilli M, Salvani R, Placidi GF. Autism and intellectual disability: a study of prevalence on a sample of the Italian population. *Journal of Intellectual Disability Research*. 2004;48:262-7.
25. Matson JL, Shoemaker M. Intellectual disability and its relationship to autism spectrum disorders. *Research in Developmental Disabilities*. 2009;30:1107-14.
26. Dawson M, Soulières I, Gernsbacher MA, Mottron L. The level and nature of autistic intelligence. *Psychol Sci*. 2007;18(8):657-62. PubMed PMID: 17680932. eng.
27. Howlin P, Arciuli J, Begeer S, Brock J, Clarke K, Costley D, et al. Research on adults with autism spectrum disorder: roundtable report. *Journal of Intellectual and Developmental Disability*. 2015;40(4):388-93.
28. Hedley D, Uljarevic M, Cameron L, Halder S, Richdale AL, Dissanayake C. Employment programmes and interventions targeting adults with autism spectrum disorder: a systematic review of the literature. *Autism*. 2016:1-13.
29. Gray KM, Piccin AK, C. M., Taffe J, Parmenter TR, Hofer S, Einfeld S, et al. Outcomes in young adulthood: are we achieving community participation and inclusion? *Journal of Intellectual Disability Research*. 2014;58(8):734-45.
30. Henninger NA, Taylor JL. Outcomes in adults with autism spectrum disorders: a historical perspective. *Autism*. 2013;17(1):103-16.
31. Howlin P, Moss P, Savage S, Rutter. Social outcomes in mid- to later adulthood among individuals diagnosed with autism and average nonverbal IQ as children. *Journal of American Academy of Child & Adolescent Psychiatry*. 2013;52(6):572-81.
32. Magiati I, Tay XW, Howlin P. Cognitive, language, social and behavioural outcomes in adults with autism spectrum disorders: a systematic review of longitudinal follow-up studies in adulthood. *Clinical Psychology Review*. 2014;34:73-86.
33. Marriage S, Wolverton A, Marriage K. Autism spectrum disorder grown up: A chart review of adult functioning. *Journal of the Canadian Academy of Child and Adolescent Psychiatry*. 2009;18(4):322.
34. Levy A, Perry A. Outcomes in adolescents and adults with autism: a review of the literature. *Research in Autism Spectrum Disorders*. 2011;5:1271-82.
35. Seltzer MM, Krauss MW, Shattuck PT, Orsmond GI, Swe A, Lord C. The symptoms of autism spectrum disorders in adolescence and adulthood. *Journal of Autism and Developmental Disorders*. 2003;33:565-81.
36. Shattuck PT, Selter MM, Greenberg JS, Orsmond GI, Bolt D, Kring S, et al. Change in autism symptoms and maladaptive behaviors in adolescents and adults with an autism spectrum disorder. *Journal of Autism and Developmental Disorders*. 2007;37:1735-47.
37. Happe F, Charlton RA. Aging in autism spectrum disorders: a mini-review. *Gerontology*. 2010;58:70-8.
38. Totsika V, Felce D, Kerr M, Hastings RP. Behaviour problems, psychiatric symptoms, and quality of life for older adults with intellectual disability with and without autism. *Journal of Autism and Developmental Disorders*. 2010;40:1171-8.
39. Khanna R, K. J-P, West-Strum D, Mahabaleshwarkar R. Health-related quality of life and its determinants among adults with autism. 8. 2014 (157-167).
40. Pellicano E, Dinsmore A, Charman T. What should autism research focus upon? Community views and priorities from the United Kingdom. *Autism*. 2014:1-5.

- 1
- 2
- 3
- 4 41. Nicolaidis C. What Can Physicians Learn from the Neurodiversity Movement? . American
- 5 Medical Association Journal of Ethics. 2012;14(6):503-10.
- 6 42. Nicolaidis C, Raymaker D, Dern S, Boisclair C, Ashkenazy E, Baggs A. Comparison of
- 7 healthcare experiences in autistic and non-autistic adults: a cross-sectional online survey facilitated
- 8 by an academic-community partnership. *Journal of General Internal Medicine*. 2012;28(6):761-9.
- 9 43. Kapp SK, Steward R, Crane L, Elliott D, Elphick C, Pellicano E, et al. 'People should be allowed
- 10 to do what they like': Autistic adults' views and experiences of stimming. *Autism*.
- 11 2019:1362361319829628.
- 12 44. Walmsley J, Johnson K. Inclusive research with people with learning disabilities: Past,
- 13 present and futures. London and New York: Jessica Kingsley Publishers 2003.
- 14 45. Bigby C, Frawley P, Ramcharan P. Conceptualising inclusive research with people with
- 15 intellectual disability. *Journal of Applied Research in Intellectual Disabilities*. 2014;27(1):3-12.
- 16 46. Bagatell N. From cure to community: transforming notions of autism. *Journal of the Society*
- 17 *for Psychological Anthropology*. 2010;38(1):33-55.
- 18 47. Milton D, Bracher M. Autistics speak but are they heard? *Medical Sociology Online*.
- 19 2013;7:61-9.
- 20 48. Nind M, Vinha H. Doing research inclusively: bridges to multiple possibilities in inclusive
- 21 research. *British Journal of Learning Disabilities*. 2012;42:102-9.
- 22 49. Gatfield O, Mangan C, Haar T, Kinninurgh A, Rodger S. 2016 Research Priorities Survey
- 23 Report. Brisbane, Queensland, Australia: Cooperative Research Centre for Living with Autism, 2016.
- 24 50. Gotham K, Marvin AR, Talyor JL, Warren Z, Anderson CM, Law PA, et al. Characterizing the
- 25 daily life, needs, and priorities of adults with autism spectrum disorder from Interactive Autism
- 26 Network. *Autism*. 2015:1-11.
- 27 51. McConachie H, Mason D, Parr JR, Garland D, Wilson C, Rodgers J. Enhancing the Validity of a
- 28 Quality of Life Measure for Autistic People. *J Autism Dev Disord*. 2018 May;48(5):1596-611. PubMed
- 29 PMID: 29188584. Pubmed Central PMCID: PMC5889785. Epub 2017/12/01. eng.
- 30 52. Seltzer MM, Greenberg JS, Taylor JL, Smith LE, Orsmond GE, Esbensen A, et al. Adolescents
- 31 and adults with autism spectrum disorders. In: Amaral DG, Dawson G, Geschwind D, editors. *Autism*
- 32 *spectrum disorders* New York: Oxford University Press; 2011.
- 33 53. Lawson L, Hascheck A, Richdale AL. SASLA Snapshot: Study of Australian School-Leavers with
- 34 Autism – Baseline Profile. Melbourne, Australia: Olga Tennison Autism Research Centre (OTARC), La
- 35 Trobe University, 2018.
- 36 54. Haas K, Costley D, Falkmer M, Richdale A, Sofronoff K, Falkmer T. Factors Influencing the
- 37 Research Participation of Adults with Autism Spectrum Disorders. *J Autism Dev Disord*. 2016
- 38 May;46(5):1793-805. PubMed PMID: 26810436. Epub 2016/01/27. eng.
- 39 55. Walmsley J. Normalisation, emancipatory research and inclusive research in learning
- 40 disability. *Disability & Society*. 2001;16(2):188-205.
- 41 56. CRC A. Inclusive research practice guide and checklists for autism research: Version 2.
- 42 Brisbane, Queensland: Autism CRC Ltd., 2016.
- 43 57. Nicolaidis C, Raymaker D, Katz M, Oshwald M, Goe R, Leottie S, et al. Community-based
- 44 participatory research to adapt health measures for use by people with developmental disabilities.
- 45 *Progress in Community Health Partnerships: Research, Education, and Action*. 2015;9(2):141-3.
- 46 58. Kroenke K, Spitzer RL, Williams JBW. The PHQ-9: validity of a brief depression severity
- 47 measure. *Journal of General Internal Medicine*. 2001;16:606-13.
- 48 59. Whitehouse AJO, Bishop DVM. Communication checklist - adult. London: The Psychological
- 49 Corporation; 2009.
- 50 60. (AIHW) ALoHaW. Autism in Australia. Web Report. Canberra, Australia: AIHW, 2017 5-4-17.
- 51 Report No.
- 52 61. Hoekstra RA, Vinkhuyzen AAE, Wheelwright S, Bartels M, Boomsma DI, Baron-Cohen S, et al.
- 53 The construction and validation of an abridged version of the Autism-Spectrum Quotient. *Journal of*
- 54 *Autism and Developmental Disorders*. 2011;41:589-96.
- 55
- 56
- 57
- 58
- 59
- 60

62. Evans E, Trollor J, Davis A, Bhardwaj A, O'Brien E. Mental health and carer support in elders with ID. Report to Ageing, Disability and Home Care, Department of Family and Community Services, NSW Australia. Sydney, Australia: Department of Developmental Disability Neuropsychiatry, UNSW Sydney, 2015.
63. StataCorp. Stata Statistical Software: Release 14. College Station, TX: StataCorp LP; 2015.
64. IBM\_Corp. IBM SPSS Statistics for Windows, Version 22.0. Armonk, NY: IBM Corp; 2013.
65. Feise RJ. Do multiple outcome measures require p-value adjustment? BMC medical research methodology. 2002;2(1):8.
66. Beesdo-Baum K, Klotsche J, Knappe S, Craske MG, LeBeau RT, Hoyer J, et al. Psychometric properties of the dimensional anxiety scales for DSM-V in an unselected sample of German treatment seeking patients. *Depression and Anxiety*. 2012;29(12):1014-24.
67. Cvejic RC, Arnold SRC, Foley K-R, Trollor JN. Neuropsychiatric profile and psychotropic medication use in adults with autism spectrum disorder: results from the Australian Longitudinal Study of Adults with Autism. *BJPsych Open*. 2018;4(6):461-6. Epub 11/13.
68. Stacey T-L, Froude EH, Trollor J, Foley K-R. Leisure participation and satisfaction in autistic adults and neurotypical adults. *Autism*. 2018;0(0):1362361318791275. PubMed PMID: 30132680.
69. Hwang YI, Foley K-R, Trollor JN. Aging Well on the Autism Spectrum: An Examination of the Dominant Model of Successful Aging. *Journal of Autism and Developmental Disorders*. 2018 May 02.
70. Ee D, Hwang J, Reppermund S, Srasuebku P, Trollor J, Foley K-R, et al. Loneliness in Adults on the Autism Spectrum. 2019.
71. Harsanyi M, Foley K-R, Froude E, Trollor J, Arnold SRC. Employment Profiles of Autistic Adults in Australia. 2019.
72. Cai RY, Richdale AL, Foley K-R, Trollor J, Uljarević M. Brief report: Cross-sectional interactions between expressive suppression and cognitive reappraisal and its relationship with depressive symptoms in autism spectrum disorder. *Research in Autism Spectrum Disorders*. 2018 2018/01/01/;45:1-8.
73. Hedley D, Uljarević M, Foley K-R, Richdale A, Trollor J. Risk and protective factors underlying depression and suicidal ideation in Autism Spectrum Disorder. *Depression and Anxiety*. 2018;35(7):648-57.
74. Arnold SRC, Uljarevic M, Hwang J, Richdale A, Trollor J, Lawson LP. Brief Report: Psychometric Properties of the Patient Health Questionnaire-9 (PHQ-9) in Autistic Adults. *Journal of Autism and Developmental Disorders*. 2019:1-9.
75. Uljarevic M, Hedley D, Foley K-R, Magiati I, Cai RY, Dissanayake C, et al. Anxiety and depression from adolescence to old age in autism spectrum disorder. 2019.
76. Baldwin S, Costley D. The experiences and needs of female adults with high-functioning autism spectrum disorder. *Autism*. 2016;20(4):483-95. PubMed PMID: 26111537.
77. Fan W, Yan Z. Factors affecting response rates of the web survey: A systematic review. *Computers in Human Behavior*. 2010 2010/03/01/;26(2):132-9.
78. Guo X, Vittinghoff E, Olgin JE, Marcus GM, Pletcher MJ. Volunteer Participation in the Health eHeart Study: A Comparison with the US Population. *Scientific Reports*. 2017 2017/05/16/;7(1):1956. En.
79. Fletcher-Watson S, Adams J, Brook K, Charman T, Crane L, Cusack J, et al. Making the future together: Shaping autism research through meaningful participation. *Autism*. 2019;0(0):1362361318786721. PubMed PMID: 30095277.
80. Loomes R, Hull L, Mandy WPL. What Is the Male-to-Female Ratio in Autism Spectrum Disorder? A Systematic Review and Meta-Analysis. *Journal of the American Academy of Child & Adolescent Psychiatry*. 2017 2017/06/01/;56(6):466-74.
81. Gilmour L, Schalomon PM, Smith V. Sexuality in a community based sample of adults with autism spectrum disorder. *Research in Autism Spectrum Disorders*. 2012 2012/01/01/;6(1):313-8.
82. Kapp SK, Gillespie-Lynch K, Sherman LE, Hutman T. Deficit, difference, or both? Autism and neurodiversity. *Developmental Psychology*. 2013 2013/49(1):59-71. en.

- 1  
2  
3 83. Nicolaidis C, Raymaker D, McDonald K, Dern S, Boisclair C, Ashkenazy E, et al. Comparison of  
4 healthcare experiences in autistic and non-autistic adults: A cross-sectional online survey facilitated  
5 by an academic-community partnership. *Journal of General Internal Medicine*. 2013;28(6):761-9.  
6  
7 84. Whiteley P, Todd L, Carr K, Shattock P. *Gender Ratios in Autism, Asperger Syndrome and*  
8 *Autism Spectrum Disorder*. Autism Insights; London. 2010 2010;2:17. English.  
9  
10 85. Whitehouse AJO, Cooper MN, Bebbington K, Alvares G, Lin A, Wray J, et al. Evidence of a  
11 reduction over time in the behavioral severity of autistic disorder diagnoses. *Autism Research*.  
12 2017;10(1):179-87.  
13  
14 86. Chadwick D, Wesson C, Fiullwood C. Internet Access by People with Intellectual Disabilities:  
15 Inequalities and Opportunities. *Future Internet*. 2013;5(3):376-97.  
16  
17 87. Fusar-Poli L, Brondino N, Rocchetti M, Panisi C, Provenzani U, Damiani S, et al. Diagnosing  
18 ASD in Adults Without ID: Accuracy of the ADOS-2 and the ADI-R. *Journal of Autism and*  
19 *Developmental Disorders*. 2017 2017/11/01;47(11):3370-9.  
20  
21 88. Barrett SL, Uljarević M, Baker EK, Richdale AL, Jones CRG, Leekam SR. The Adult Repetitive  
22 Behaviours Questionnaire-2 (RBQ-2A): A Self-Report Measure of Restricted and Repetitive  
23 Behaviours. *Journal of Autism and Developmental Disorders*. 2015 2015/11/01;45(11):3680-92.  
24  
25 89. Robertson AE, Simmons DR. The relationship between sensory sensitivity and autistic traits  
26 in the general population. *Journal of Autism and Developmental Disorders*. 2012;43:775-84.  
27  
28 90. Carleton RN, Norton PJ, Asmundson GJG. Fearing the unknown: a short version of the  
29 intolerance of uncertainty scale. *Journal of Anxiety Disorders*. 2007;21:105-17.  
30  
31 91. Spitzer RL, Williams JBW, Kroenke K, Linzer M, deGruy FV, Hahn SR. Utility of new procedure  
32 for diagnosis mental-disorders in primary-care: the PRIME-MD 1000 study. *Journal of American*  
33 *Medical Association*. 1994;272:1749-56.  
34  
35 92. Ware JE, Kosinski M, Keller SD. A 12-Item Short-Form Health Survey: construction of scales  
36 and preliminary tests of reliability and validity. *Medical care*. 1996;34(3):220.  
37  
38 93. Sletten DM, Suarez GA, Low PA, Mandrekar J, Singer W. COMPASS 31: A refined and  
39 abbreviated composite autonomic symptom score. *Mayo Clinic Proceedings*. 2012;87(12):1196-201.  
40  
41 94. Buysse DJ, Reynolds CF, Monk TH, Berman SR, Kupfer DJ. The Pittsburgh Sleep Quality Index:  
42 a new instrument for psychiatric practise and research. *Psychiatry Reserves*. 1989;28:193-213.  
43  
44 95. Gardisar M, Lack L, Richards H, Harris J, Gallasch J, Boundy M, et al. The Flinders Fatigue  
45 Scale: preliminary psychometric properties and clinical sensitivity of a new scale for measuring  
46 daytime fatigue associated with insomnia. *Journal of Clinical Sleep Medicine*. 2007;3(7):722-8.  
47  
48 96. Craske MG, Wittchen H-U, Bogels S, Stein M, Andrews G, Lebeu R. Severity measure for  
49 Generalized Anxiety Disorder - adult: American Psychiatric Association; 2013.  
50  
51 97. Tennant R, Hiller L, Fishwick R, Platt S, Joseph S, Weich S, et al. The Warwick-Edinburgh  
52 mental well-being scale (WEMWBS): development and UK validation. *Health and Quality of Life*  
53 *Outcomes*. 2007;5(63):1-13.  
54  
55 98. Chen G, Gully SM, Eden D. Validation of a new general self-efficacy scale. *Organizational*  
56 *Research Methods*. 2001;4(1):62-83.  
57  
58 99. Gross JJ, John OP. Individual differences in two emotion regulation processes: implications  
59 for affect, relationships, and well-being. *Journal of Personality and Social Psychology*.  
60 2003;85(2):348-62.  
100. Mohr C, Tonge BJ, Einfeld SL, Taffe J. *The Developmental Behaviour Checklist for Adults (DBC-A) Revised*. Sydney, Australia: University of Sydney and Monash University, 2011.  
101. Carver CS. You want to measure coping but your protocol's too long: consider the brief COPE. *International journal of behavioral medicine*. 1997;4(1):92-100. PubMed PMID: 16250744. Epub 1997/01/01. eng.  
102. Crook TH, 3rd, Feher EP, Larrabee GJ. Assessment of memory complaint in age-associated memory impairment: the MAC-Q. *International psychogeriatrics*. 1992 Fall;4(2):165-76. PubMed PMID: 1477304. Epub 1992/01/01. eng.

- 1  
2  
3 103. Hays RD, DiMatteo MR. A short-form measure of loneliness. *Journal of Personality*  
4 *Assessment*. 1987;51:69-81.
- 5 104. Sarason IG, Levine HM, Basham RB, Sarason BR. Assessing social support: the social support  
6 questionnaire. *Journal of Personality and Social Psychology*. 1983;44(1):127-39.
- 7 105. The WHOQOL Group. The World Health Organization Quality of Life assessment (WHOQOL)-  
8 BREF quality of life assessment. *Psychological Medicine*. 1995;28:551-5.
- 9 106. Maenner MJ, Smith LE, Hong J, Makuch R, Greenberg JS, Mailick MR. Evaluation of an  
10 activities of daily living scale for adolescents and adults with developmental disabilities. *Disability*  
11 *and Health Journal* 2013;6(1):8-17.
- 12 107. Luciano JV, Ayuso-Mateos JL, Aguado J, Fernandez A, Serrano-Blanco A, Roca M, et al. The  
13 12-item World Health Organisation Disability Assessment Schedule (WHO-DAS II): a nonparametric  
14 item response analysis *BMC Medical Research Methodology*. 2010;10(45):1-9.
- 15 108. Taylor JL, Seltzer MM. Developing a vocational index for adults with autism spectrum  
16 disorders. *Journal of Autism and Developmental Disorders*. 2012;42(12):2669-79.
- 17 109. Beard JG, Ragheb MG. Measuring leisure satisfaction. *Journal of Leisure Research*.  
18 1980;12:20-33.
- 19 110. Chisholm D, Knapp MRJ, Knudsen HC, Amaddeo F, Gaité L, van Wijngaarden B, et al. Client  
20 socio-demographic and service receipt inventory - European version: development of an instrument  
21 for international research. *The British Journal of Psychiatry*. 2000;177:28-33.
- 22 111. Bengston VL, Allen KR. The life course perspective applied to families overtime. In: Boss P,  
23 Doherty W, LaRossa R, Schumm W, Steinmetz S, editors. *Sourcebook of family theories and*  
24 *methods: a contextual approach*. New York: Plenum Press; 1993. p. 469-98.
- 25 112. McCarron M, Gill M, Lawlor B, Beagly C. A pilot study of the reliability and validity of the  
26 Caregiver Activity Survey - Intellectual disability (CAS-ID). *Journal of Intellectual Disability Research*.  
27 2002;46(8):605-12.
- 28 113. Bedard M, Molloy DW, Squire L, Dubois BA, Lever JA, O'Donnell M. The Zarit Burden  
29 Interview: a new short version and screening version. *The Gerontologist*. 2001;41(5):652-7.
- 30 114. Alliance NRH. The little book of rural health numbers: Author; 2015. Available from:  
31 <https://www.ruralhealth.org.au/book/little-book-rural-health-numbers>.
- 32  
33  
34  
35  
36  
37  
38  
39  
40  
41  
42  
43  
44  
45  
46  
47  
48  
49  
50  
51  
52  
53  
54  
55  
56  
57  
58  
59  
60

1  
2  
3  
4  
5  
6  
7  
8  
9  
10  
11  
12  
13  
14  
15  
16  
17  
18  
19  
20  
21  
22  
23  
24  
25  
26  
27  
28  
29  
30  
31  
32  
33  
34  
35  
36  
37  
38  
39  
40  
41  
42  
43  
44  
45  
46  
47  
48  
49  
50  
51  
52  
53  
54  
55  
56  
57  
58  
59  
60

**Figure Caption Sheet**

*Figure 1.* Satisfaction responses upon completion combined by survey type (n=482)

For peer review only

Table 1

*The ALSAA Inclusive Research Protocol*

| <b>Step</b>                                            | <b>Description of step and considerations</b>                                                                                                                                                                                                                                                                                                                                                                                                                                                                                                                                                                                                                                                                                                                                           |
|--------------------------------------------------------|-----------------------------------------------------------------------------------------------------------------------------------------------------------------------------------------------------------------------------------------------------------------------------------------------------------------------------------------------------------------------------------------------------------------------------------------------------------------------------------------------------------------------------------------------------------------------------------------------------------------------------------------------------------------------------------------------------------------------------------------------------------------------------------------|
| Step 1: Recruitment of advisors / peer-researchers     | Ensure recruitment is inclusive of all potential autistic individuals including adults with intellectual disability, consider using multiple channels of recruitment (e.g., Autism associations, self-advocacy networks, carer networks, adult networks, local radio, social media and word of mouth). In Australia, seek support from the Autism CRC Research Academy*.                                                                                                                                                                                                                                                                                                                                                                                                                |
| Step 2: Building rapport                               | If an established relationship does not already exist between the autistic individual and researcher, the researcher should offer to meet the individual (either face-to-face, over video conference or phone call). Be mindful that some autistic individuals may prefer to communicate via text or email and not to meet in person and should not be required to.                                                                                                                                                                                                                                                                                                                                                                                                                     |
| Step 3: Clarify what will be expected from the advisor | Outline tasks autistic advisors or peer researchers will be asked to complete. Specify the frequency and timing of when they are likely to be contacted. For specific tasks clearly provide step-by-step instructions, flexible lead-time, timeframes for feedback, area of investigation, and broad aim of the study. Make information available in Easy English or plain language as appropriate. Specify the type and nature of advice sought. Clearly describe how and where their input will be used and why their input is being sought.                                                                                                                                                                                                                                          |
| Step 4: Ethics, confidentiality and acknowledgement    | Describe ethics of the project and expected confidentiality. As required, specify on individual documents that the document is confidential and not to be distributed without discussion with the researcher. Can the autistic individual opt out if they would like? Outline what will happen if they choose to withdraw, e.g., this will not affect their relationship with the research team, university or any other associated organisations. It is a voluntary process. Negotiate and make explicit how the autistic advisor or peer-researcher will be acknowledged. Consider how the autistic individual may be recognised in a manuscript or research output. This may include as a co-author, in the acknowledgements section, and/or in discussing methodology and findings. |
| Step 5: Identify preferred communication style         | Ask the autistic individual their preferred communication style for providing feedback (e.g., face-to-face, phone call, email, video, or a variety of techniques). Also, in what medium they would like to receive the results/findings e.g., academic writing style, easy English writing style, mostly graphs/pictures, mostly dot points, described in person, video, PowerPoint presentation, etc. Although not all mediums may be practical, it is important to identify the autistic advisor's preferred style and then work together to identify a medium of communication which will be understood and accessible by both the autistic advisor and the researcher.                                                                                                              |
| Step 6: The sensory environment                        | The researcher must provide an 'autism-friendly' environment on any occasion where the autistic advisor and the researcher may be meeting in person, see p. 12-15 in the <i>Autism CRC Inclusive Research Practice Guides and Checklists for Autism Research</i> <sup>56</sup> regarding creating autism-friendly environments.                                                                                                                                                                                                                                                                                                                                                                                                                                                         |
| Step 7: Involvement in                                 | Autistic advisors input is sought in regard to questionnaire design and interpretation of results. The researcher will need to present questionnaire                                                                                                                                                                                                                                                                                                                                                                                                                                                                                                                                                                                                                                    |



|                                                                                     |                                            |                                                                                                                                                                                                                                                                                                                                                                                                                                                                                                                                                                                                                                                                                                                                                                                                                                                                              |
|-------------------------------------------------------------------------------------|--------------------------------------------|------------------------------------------------------------------------------------------------------------------------------------------------------------------------------------------------------------------------------------------------------------------------------------------------------------------------------------------------------------------------------------------------------------------------------------------------------------------------------------------------------------------------------------------------------------------------------------------------------------------------------------------------------------------------------------------------------------------------------------------------------------------------------------------------------------------------------------------------------------------------------|
| 1<br>2<br>3<br>4<br>5<br>6<br>7<br>8<br>9<br>10<br>11<br>12<br>13<br>14<br>15<br>16 | methodological design / results / findings | design questions or quantitative or qualitative results in an understandable format, developing design issue summaries or results summaries in the medium preferred by the autistic advisor or peer-researcher. This means the researcher may need to make a number of decisions around data analysis and interpretation.<br>Where possible, outline each of these decisions so the process is transparent and the autistic advisor can reflect on the decisions made by the researcher and whether these were appropriate in their view. Provide clear guidance on what advice is being sought, provide lead time, and the timeframe and process to follow for providing advice. How long should the advice be? In what format? Who will be reading it, who do they send the advice to? What are the researchers specifically looking for, what should the advice focus on? |
| 17<br>18<br>19<br>20<br>21                                                          | Step 8: Feedback                           | Once the researcher receives the advice from the autistic advisor, the researcher should provide a timeframe in which the autistic advisor will receive an update on what aspects of the advice was incorporated and the effect it had/didn't have on the methodology, findings, and/or interpretation.                                                                                                                                                                                                                                                                                                                                                                                                                                                                                                                                                                      |
| 22<br>23<br>24<br>25<br>26<br>27                                                    | Step 9: Final checks                       | Once the manuscript or research output has been further developed, the autistic advisor should receive a copy of the manuscript prior to submission. If the autistic advisor has limited experience with academic writing, the researcher should offer to describe/provide a lay summary of the overall article for the advisor.                                                                                                                                                                                                                                                                                                                                                                                                                                                                                                                                             |
| 28<br>29<br>30                                                                      | Step 10: Acknowledgement                   | Autistic advisor or peer-researcher to be acknowledged in the agreed upon manner (e.g., co-author, thanked in the acknowledgement section, acknowledged during a presentation etc.)                                                                                                                                                                                                                                                                                                                                                                                                                                                                                                                                                                                                                                                                                          |

\*The Autism CRC Research Academy (<https://www.autismcrc.com.au/research-academy>) provides training for peer researchers.

Table 2

*Measurements included in the ALSAA surveys*

| Measure / domain                                                                                | Self-report | Informant report | Carer |
|-------------------------------------------------------------------------------------------------|-------------|------------------|-------|
| <b>Demographics and personal characteristics</b>                                                |             |                  |       |
| Basic demographics<br>(Age, Sex, Ethnicity, English speaking status)                            | ✓           | ✓                | ✓     |
| Other demographics<br>(Education, Occupation <sup>a</sup> , Family & living conditions, Income) | ✓           | ✓                | ✓     |
| <b>Autism Characteristics</b>                                                                   |             |                  |       |
| The Autism Quotient - Short <sup>b</sup> (AQ-Short) <sup>61</sup>                               | ✓           | ✓                | ✓     |
| Repetitive Behaviours Questionnaire-2 Adult Version (RBQ-2A) <sup>88</sup>                      | ✓           | ✓                |       |
| The Glasgow Sensory Questionnaire <sup>89</sup>                                                 | ✓           | ✓                |       |
| The Intolerance of Uncertainty Scale-12 <sup>90</sup>                                           | ✓           |                  | ✓     |
| <b>Health &amp; Well-Being</b>                                                                  |             |                  |       |
| Medical history                                                                                 | ✓           | ✓                | ✓     |
| Medication profile                                                                              | ✓           | ✓                |       |
| Smoking, alcohol and illicit drug use <sup>a</sup>                                              | ✓           | ✓                |       |
| The Patient Health Questionnaire-15 <sup>91</sup>                                               | ✓           |                  | ✓     |
| Medical Outcomes Study Short Form Health Survey-12 (SF-12) <sup>92</sup>                        | ✓           | ✓                | ✓     |
| The Composite Autonomic Symptom Score - 31 (COMPASS 31) <sup>93</sup>                           | ✓           |                  |       |
| Pittsburgh Sleep Quality Index <sup>94</sup>                                                    | ✓           |                  |       |
| Flinders Fatigue Scale <sup>95</sup>                                                            | ✓           |                  |       |
| <b>Mental &amp; Emotional Health</b>                                                            |             |                  |       |
| DSM-5 Dimensional Anxiety Scales: Generalized Anxiety Disorder-Adult (DSM5 GAD-A) <sup>96</sup> | ✓           |                  | ✓     |
| The Patient Health Questionnaire-9 (PHQ-9) <sup>58</sup>                                        | ✓           |                  | ✓     |
| The Warwick Edinburgh Mental Well-being Scale <sup>97</sup>                                     | ✓           |                  |       |
| The New General Self-Efficacy Scale <sup>98</sup>                                               | ✓           |                  |       |
| The Emotion Regulation Questionnaire <sup>99</sup>                                              | ✓           |                  | ✓     |
| Developmental Behaviour Checklist-Adolescent/Adult version (DBC-A) Revised <sup>100</sup>       |             | ✓                |       |
| The Brief COPE <sup>101</sup>                                                                   | ✓           |                  | ✓     |
| Memory Complaint Questionnaire (MAC-Q) <sup>102</sup>                                           | ✓           |                  |       |
| <b>Relationships &amp; Social Networks</b>                                                      |             |                  |       |
| UCLA Loneliness Scale-8 (ULS-8) <sup>103</sup>                                                  | ✓           |                  |       |
| Supports and networks <sup>a</sup>                                                              | ✓           | ✓                |       |
| The Social Support Questionnaire (SSQ) <sup>104</sup>                                           | ✓           |                  | ✓     |
| <b>Activities, Participation &amp; Quality of Life</b>                                          |             |                  |       |

1  
2  
3  
4  
5  
6  
7  
8  
9  
10  
11  
12  
13  
14  
15  
16  
17  
18  
19  
20  
21  
22  
23  
24  
25  
26  
27  
28  
29  
30  
31  
32  
33  
34  
35  
36  
37  
38  
39  
40  
41  
42  
43  
44  
45  
46  
47  
48  
49  
50  
51  
52  
53  
54  
55  
56  
57  
58  
59  
60

|                                                                                      |   |   |   |
|--------------------------------------------------------------------------------------|---|---|---|
| WHOQOL-BREF <sup>105</sup>                                                           | ✓ |   | ✓ |
| Waisman Activities of Daily Living Scale (W-ADL) <sup>106</sup>                      | ✓ | ✓ |   |
| World Health Organisation Disability Assessment Schedule (WHO-DAS II) <sup>107</sup> | ✓ | ✓ | ✓ |
| Vocational Index for Adults with Autism <sup>108</sup>                               | ✓ | ✓ |   |
| Special abilities and interests <sup>c</sup>                                         | ✓ |   |   |
| Leisure activities participation                                                     | ✓ | ✓ |   |
| Leisure Satisfaction Scale (LSS) <sup>109</sup>                                      | ✓ |   |   |
| Driving and transport                                                                | ✓ | ✓ | ✓ |
| Service Usage                                                                        |   |   |   |
| Client Service Receipt Inventory (CSRI) <sup>110</sup>                               | ✓ | ✓ |   |
| Health service seeking behaviour                                                     | ✓ | ✓ |   |
| Early intervention service history                                                   | ✓ | ✓ |   |
| Justice system contact                                                               | ✓ | ✓ |   |
| Preventative health screening                                                        | ✓ | ✓ |   |
| Caring                                                                               |   |   |   |
| Positive Affect Index <sup>111</sup>                                                 |   |   | ✓ |
| Caregiver Activity Survey (CAS-ID) <sup>112</sup>                                    |   |   | ✓ |
| Zarit Burden Interview <sup>113</sup>                                                |   |   | ✓ |

<sup>a</sup> Based on questions from the National Health Survey of Mental Health and Wellbeing (Slade, Johnston, Oakley Browne, Andrews, & Whiteford, 2009). <sup>b</sup> A 28-item parent-carer report adaptation using items from the AQ-Adolescent (Baron-Cohen, Hoekstra, Knickmeyer, & Wheelwright, 2006) was used for the informant-report survey <sup>c</sup>Based on questions from the Interactive Autism Network (<https://iancommunity.org/>)

Table 3

*Recruitment statistics at close of Time 1 data gathering*

| Sample                              | Registered | Non-respondent | Ineligible (%) | Withdrawn (%) | Partial Completion (%) | Completed (%) |
|-------------------------------------|------------|----------------|----------------|---------------|------------------------|---------------|
| Self-report autistic adults         | 345        | 75 (22)        | 6 (2)          | 11 (3)        | 16 (5)                 | 237 (69)      |
| Self-report non-autistic adults     | 221        | 48 (22)        | 7 (3)          | 20 (9)        | 16 (7)                 | 130 (59)      |
| Carer                               | 185        | 48 (26)        | 22 (12)        | 13 (7)        | 2 (1)                  | 100 (54)      |
| Informant-report for autistic adult | 78         | 22 (28)        | 5 (6)          | 9 (11)        | 0 (0)                  | 42 (54)       |

Table 4

*Participant Characteristics*

| Characteristic                    | Autistic adults self-report formally diagnosed (N=221) | Autistic adults self-report no formal diagnosis (N=32) | Autistic adults informant-report (N=42) | Carers (N=102) | Non-autistic self-report (N=146) |
|-----------------------------------|--------------------------------------------------------|--------------------------------------------------------|-----------------------------------------|----------------|----------------------------------|
| Age mean (SD)                     | 41.8 (12.2)                                            | 44.2 (8.1)                                             | 32.5 (9.9)                              | 56.3 (11.2)    | 43.7 (13.5)                      |
| Gender (%)                        |                                                        |                                                        |                                         |                |                                  |
| Male                              | 86 (39)                                                | 14 (44)                                                | 34 (81)                                 | 16 (16)        | 29 (20)                          |
| Female                            | 124 (56)                                               | 17 (53)                                                | 8 (19)                                  | 85 (83)        | 117 (80)                         |
| Other                             | 11 (5)                                                 | 1 (3)                                                  | 0                                       | 1 (1)          | 0                                |
| <sup>a</sup> Ethnicity (%)        |                                                        |                                                        |                                         |                |                                  |
| Caucasian                         | 194 (88)                                               | 25 (78)                                                | 38 (90)                                 | 86 (89)        | 122 (85)                         |
| Other                             | 27 (12)                                                | 7 (22)                                                 | 4 (9)                                   | 11 (11)        | 22 (15)                          |
| Multilingual (%)                  | 26 (12)                                                | 5 (16)                                                 | 0                                       | 6 (6)          | 18 (12)                          |
| <sup>b</sup> SEIFA decile (SD)    | 6.18 (2.89)                                            | 5.74 (3.09)                                            | 6.58 (2.88)                             | 6.60 (2.78)    | 7.01 (2.60)                      |
| <sup>bc</sup> Rural / Remoteness  |                                                        |                                                        |                                         |                |                                  |
| Major City                        | 146 (71)                                               | 17 (55)                                                | 32 (84)                                 | 72 (73)        | 114 (83)                         |
| Inner Regional                    | 44 (21)                                                | 10 (32)                                                | 5 (13)                                  | 21 (21)        | 19 (14)                          |
| Outer Regional                    | 12 (6)                                                 | 4 (13)                                                 | 1 (3)                                   | 5 (5)          | 5 (4)                            |
| Remote / Very Remote              | 4 (2)                                                  | 0                                                      | 0                                       | 0              | 0                                |
| <sup>d</sup> Living situation (%) |                                                        |                                                        |                                         |                |                                  |
| Living alone                      | 58 (26)                                                | 9 (28)                                                 | 3 (7)                                   | 14 (14)        | 26 (18)                          |
| Living as couple                  | 95 (43)                                                | 18 (56)                                                | 4 (9)                                   | 74 (75)        | 105 (72)                         |
| Living with parents               | 31 (14)                                                | 0                                                      | 24 (57)                                 | 0              | 5 (3)                            |
| Living with other relatives       | 3 (1)                                                  | 0                                                      | 1 (2)                                   | 6 (6)          | 3 (2)                            |
| Living with others                | 20 (9)                                                 | 5 (16)                                                 | 8 (19)                                  | 4 (4)          | 5 (3)                            |
| Other                             | 14 (6)                                                 | 0                                                      | 2 (5)                                   | 1 (1)          | 2 (1)                            |
| <sup>e</sup> Marital Status (%)   |                                                        |                                                        |                                         |                |                                  |
| Single                            | 73 (33)                                                | 7 (22)                                                 | 36 (86)                                 | 4 (4)          | 22 (15)                          |
| Married                           | 66 (30)                                                | 12 (37)                                                | 4 (9)                                   | 65 (66)        | 90 (62)                          |
| De facto                          | 17 (8)                                                 | 3 (9)                                                  | 0                                       | 8 (8)          | 14 (9)                           |
| Never married                     | 8 (4)                                                  | 3 (9)                                                  | 2 (5)                                   | 2 (2)          | 3 (2)                            |
| Widowed                           | 1 (0)                                                  | 0                                                      | 0                                       | 3 (3)          | 2 (1)                            |
| Divorced now single               | 21 (9)                                                 | 3 (9)                                                  | 0                                       | 8 (8)          | 9 (6)                            |
| Divorced now remarried / de facto | 12 (5)                                                 | 2 (6)                                                  | 0                                       | 2 (2)          | 2 (1)                            |
| Separated                         | 7 (3)                                                  | 1 (3)                                                  | 0                                       | 2 (2)          | 1 (1)                            |
| Other                             | 16 (7)                                                 | 1 (3)                                                  | 0                                       | 4 (4)          | 3 (2)                            |
| Educational Status (%)            |                                                        |                                                        |                                         |                |                                  |

|                              |                           |                         |                         |                         |                           |
|------------------------------|---------------------------|-------------------------|-------------------------|-------------------------|---------------------------|
| Completed high school        | 163 (76)<br><i>n</i> =215 | 20 (64)<br><i>n</i> =31 | 21 (51)<br><i>n</i> =41 | 86 (88)<br><i>n</i> =98 | 120 (86)<br><i>n</i> =139 |
| Vocational education         | 61 (35)<br><i>n</i> =174  | 16 (57)<br><i>n</i> =28 | 4 (11)<br><i>n</i> =35  | 17 (17)<br><i>n</i> =98 | 20 (16)<br><i>n</i> =127  |
| University education         | 113 (65)<br><i>n</i> =174 | 12 (43)<br><i>n</i> =28 | 1 (3)<br><i>n</i> =35   | 59 (60)<br><i>n</i> =98 | 107 (84)<br><i>n</i> =127 |
| <sup>f</sup> Employment (%)  |                           |                         |                         |                         |                           |
| Open employment              | 116 (57)                  | 20 (69)                 | 6 (15)                  | 59 (60)                 | 104 (76)                  |
| Student / other day activity | 38 (19)                   | 3 (10)                  | 24 (60)                 | 3 (3)                   | 17 (12)                   |
| Retired, no volunteering     | 8 (4)                     | 2 (7)                   | 2 (5)                   | 19 (19)                 | 6 (4)                     |
| Homecare                     | 17 (8)                    | 3 (10)                  | 0                       | 9 (9)                   | 9 (6)                     |
| No activity                  | 22 (11)                   | 1 (3)                   | 8 (20)                  | 9 (9)                   | 1 (1)                     |

<sup>a</sup> Ethnicity: Carers, *n*=97; Non-autistic (self-report), *n*=144

<sup>b</sup> Autistic adults (diagnosis, self-report), *n*=209; Autistic adults (no diagnosis, self-report), *n*=31; Autistic adults (informant report), *n*=38; Carers, *n*=99; Non-autistic (self-report), *n*=138

<sup>c</sup> Australian population is 70% Major city, 18% Inner regional, 9% Outer regional, 1% Remote, 1% Very remote in the 2011 Census<sup>114</sup>

<sup>d</sup> Carers' Living situation: *n*=99

<sup>e</sup> Carers' Marital status: *n*=98

<sup>f</sup> Employment: Autistic adults (diagnosis, self-report), *n*=201; Autistic adults (no diagnosis, self-report), *n*=29; Autistic adults (informant report), *n*=40; Carers, *n*=99; Non-autistic (self-report), *n*=137

Table 5

*Diagnostic Characteristics*

| Characteristic                              | Autistic adults self-report formally diagnosed (N=221) | Autistic adults self-report no formal diagnosis (N=32) | Autistic adults informant-report (N=42) | Carers (N=102)                   | Non-autistic self-report (N=146) |
|---------------------------------------------|--------------------------------------------------------|--------------------------------------------------------|-----------------------------------------|----------------------------------|----------------------------------|
| AQ score mean (SD)                          | 87.6 (10.3)<br>n=210                                   | 83.7 (8.8)                                             | 84.2 (9.5)<br>n=36                      | 57.3 (13.8)<br>n=60 <sup>a</sup> | 55.1 (11.9)<br>n=137             |
| Above AQ Cutoff (%)                         | 203 (97)                                               | 31 (97)                                                | 35 (97)                                 | 18 (30)                          | 30 (22)                          |
| <sup>b</sup> Autism Diagnosis               |                                                        |                                                        |                                         |                                  |                                  |
| Autism spectrum disorder / condition        | 49 (22)                                                | -                                                      | 17 (40)                                 | -                                | -                                |
| Asperger's syndrome                         | 130 (59)                                               | -                                                      | 11 (26)                                 | -                                | -                                |
| Autistic disorder                           | 1 (0)                                                  | -                                                      | 6 (14)                                  | -                                | -                                |
| 'High-functioning' autism                   | 32 (14)                                                | -                                                      | 3 (7)                                   | -                                | -                                |
| PDD-NOS                                     | 1 (0)                                                  | -                                                      | 1 (2)                                   | -                                | -                                |
| Other                                       | 6 (3)                                                  | -                                                      | 2 (5)                                   | -                                | -                                |
| No formal diagnosis                         | -                                                      | 32 (100)                                               | 1 (2)                                   | -                                | -                                |
| Age at Diagnosis Mean (SD)                  | 35.3 (15.1)<br>n=217                                   | -                                                      | 10.01 (10.8)<br>n=38                    | -                                | -                                |
| Years since Diagnosis Mean (SD)             | 6.9 (8.3)<br>n=217                                     | -                                                      | 21.9 (9.8)<br>n=38                      | -                                | -                                |
| Intellectual Disability (%)                 | 10 (4)                                                 | 1 (3)                                                  | 33 (78)                                 | 1 (1)                            | 1 (1)                            |
| Other Developmental Disability (%)          | 6 (3)                                                  | 2 (6)                                                  | 9 (21)                                  | 0                                | 1 (1)                            |
| <sup>c</sup> Other Psychiatric Diagnosis(%) |                                                        |                                                        |                                         |                                  |                                  |
| Currently                                   | 148 (69)<br>n=213                                      | 13 (42)<br>n=31                                        | 22 (52)                                 | 38 (39)<br>n=100                 | 29 (21)<br>n=140                 |
| At any time                                 | 191 (89)<br>n=213                                      | 28 (90)<br>n=31                                        | 31 (74)                                 | 68 (68)<br>n=100                 | 67 (48)<br>n=140                 |
| Depression (PHQ-9) above cut-off (%)        | 103 (52)<br>n=199                                      | 15 (52)<br>n=29                                        | -                                       | 28 (29)<br>n=97                  | 15 (12)<br>n=126                 |
| Anxiety (DSM5 GAD-A) above cut-off (%)      | 115 (56)<br>n=206                                      | 14 (47)<br>n=32                                        | -                                       | 27 (27)<br>n=99                  | 14 (11)<br>n=130                 |

<sup>a</sup> Carers were asked to complete the AQ scale only if they were a biological relative of the adult with autism

1  
2  
3 <sup>b</sup> Autism diagnosis: Autistic adults (self-report, diagnosed),  $n=220$

4 <sup>c</sup> Recording of a psychiatric diagnosis apart from autism spectrum conditions or intellectual  
5 disability  
6  
7  
8  
9  
10  
11  
12  
13  
14  
15  
16  
17  
18  
19  
20  
21  
22  
23  
24  
25  
26  
27  
28  
29  
30  
31  
32  
33  
34  
35  
36  
37  
38  
39  
40  
41  
42  
43  
44  
45  
46  
47  
48  
49  
50  
51  
52  
53  
54  
55  
56  
57  
58  
59  
60

For peer review only



Table 6

*Carer Characteristics (N=102)*

| Characteristic                                              | Frequency / Mean          |
|-------------------------------------------------------------|---------------------------|
| Relationship to autistic person (%)                         |                           |
| Mother                                                      | 42 (43, <i>n</i> =98)     |
| Father                                                      | 10 (10, <i>n</i> =98)     |
| Partner/spouse                                              | 23 (23, <i>n</i> =98)     |
| Sibling                                                     | 2 (2, <i>n</i> =98)       |
| Child                                                       | 1 (1, <i>n</i> =98)       |
| Carer – unspecified                                         | 17 (17, <i>n</i> =98)     |
| Other                                                       | 3 (3, <i>n</i> =98)       |
| Age of autistic adult cared for mean ( <i>SD</i> )          | 37.5 (13.2)               |
| Hours spent per week with autistic adult mean ( <i>SD</i> ) | 63.4 (57.8, <i>n</i> =92) |

1  
2  
3  
4  
5  
6  
7  
8  
9  
10  
11  
12  
13  
14  
15  
16  
17  
18  
19  
20  
21  
22  
23  
24  
25  
26  
27  
28  
29  
30  
31  
32  
33  
34  
35  
36  
37  
38  
39  
40  
41  
42  
43  
44  
45  
46  
47  
48  
49  
50  
51  
52  
53  
54  
55  
56  
57  
58  
59  
60

For peer review only

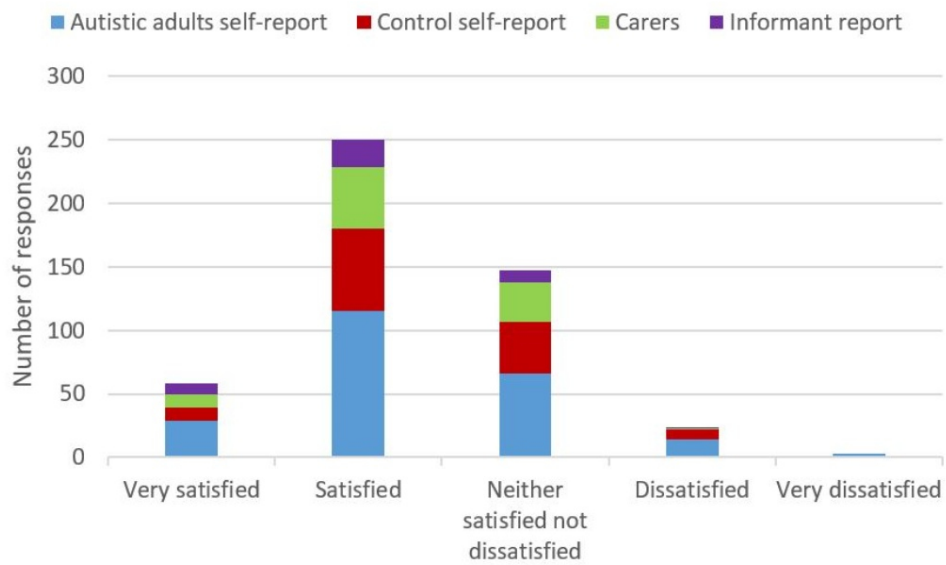

Figure 1. Satisfaction responses upon completion combined by survey type (n=482)

89x53mm (300 x 300 DPI)

# BMJ Open

## Cohort profile: The Australian Longitudinal Study of Adults with Autism (ALSAA)

|                                 |                                                                                                                                                                                                                                                                                                                                                                                                                                                                                                                                                                                                                                                                                                                                                                                                                                                                                                                                                                                                                                                                                                                                                                                                                                                                                                                                                                                                                                                                                                                                                                                                                                                                                                                |
|---------------------------------|----------------------------------------------------------------------------------------------------------------------------------------------------------------------------------------------------------------------------------------------------------------------------------------------------------------------------------------------------------------------------------------------------------------------------------------------------------------------------------------------------------------------------------------------------------------------------------------------------------------------------------------------------------------------------------------------------------------------------------------------------------------------------------------------------------------------------------------------------------------------------------------------------------------------------------------------------------------------------------------------------------------------------------------------------------------------------------------------------------------------------------------------------------------------------------------------------------------------------------------------------------------------------------------------------------------------------------------------------------------------------------------------------------------------------------------------------------------------------------------------------------------------------------------------------------------------------------------------------------------------------------------------------------------------------------------------------------------|
| Journal:                        | <i>BMJ Open</i>                                                                                                                                                                                                                                                                                                                                                                                                                                                                                                                                                                                                                                                                                                                                                                                                                                                                                                                                                                                                                                                                                                                                                                                                                                                                                                                                                                                                                                                                                                                                                                                                                                                                                                |
| Manuscript ID                   | bmjopen-2019-030798.R2                                                                                                                                                                                                                                                                                                                                                                                                                                                                                                                                                                                                                                                                                                                                                                                                                                                                                                                                                                                                                                                                                                                                                                                                                                                                                                                                                                                                                                                                                                                                                                                                                                                                                         |
| Article Type:                   | Cohort profile                                                                                                                                                                                                                                                                                                                                                                                                                                                                                                                                                                                                                                                                                                                                                                                                                                                                                                                                                                                                                                                                                                                                                                                                                                                                                                                                                                                                                                                                                                                                                                                                                                                                                                 |
| Date Submitted by the Author:   | 15-Aug-2019                                                                                                                                                                                                                                                                                                                                                                                                                                                                                                                                                                                                                                                                                                                                                                                                                                                                                                                                                                                                                                                                                                                                                                                                                                                                                                                                                                                                                                                                                                                                                                                                                                                                                                    |
| Complete List of Authors:       | <p>Arnold, Samuel; UNSW, Department of Developmental Disability Neuropsychiatry (3DN); Autism CRC</p> <p>Foley, Kitty-Rose; Southern Cross University - Gold Coast Campus, School of Health and Human Sciences; Autism CRC</p> <p>Hwang, Ye In; UNSW, Department of Developmental Disability Neuropsychiatry (3DN); Autism CRC</p> <p>Richdale, Amanda; La Trobe University, Olga Tennison Autism Research Centre, School of Psychology and Public Health; Autism CRC</p> <p>Uljarevic, Mirko ; Stanford University, Stanford Autism Center, Division of Child and Adolescent Psychiatry, Department of Psychiatry and Behavioral Sciences, School of Medicine; La Trobe University, Olga Tennison Autism Research Centre, School of Psychology and Public Health</p> <p>Lawson, Lauren; La Trobe University, Olga Tennison Autism Research Centre, School of Psychology and Public Health; Autism CRC</p> <p>Cai, Ru; La Trobe University, Olga Tennison Autism Research Centre, School of Psychology and Public Health; Autism CRC</p> <p>Falkmer, Torbjorn; Curtin University, School of Occupational Therapy, Social Work and Speech Pathology; Autism CRC</p> <p>Falkmer, Marita; Curtin University, School of Occupational Therapy, Social Work and Speech Pathology; Autism CRC</p> <p>Lennox, Nick; University of Queensland, Australia, Queensland Centre for Intellectual and Developmental Disability, Mater Research Institute - UQ; Autism CRC</p> <p>Urbanowicz, Anna; RMIT University, Health, Society &amp; Medicine Research Program, Social and Global Studies Centre; Autism CRC</p> <p>Trollor, Julian; UNSW, Department of Developmental Disability Neuropsychiatry (3DN); Autism CRC</p> |
| <b>Primary Subject Heading</b>: | Mental health                                                                                                                                                                                                                                                                                                                                                                                                                                                                                                                                                                                                                                                                                                                                                                                                                                                                                                                                                                                                                                                                                                                                                                                                                                                                                                                                                                                                                                                                                                                                                                                                                                                                                                  |
| Secondary Subject Heading:      | Diagnostics                                                                                                                                                                                                                                                                                                                                                                                                                                                                                                                                                                                                                                                                                                                                                                                                                                                                                                                                                                                                                                                                                                                                                                                                                                                                                                                                                                                                                                                                                                                                                                                                                                                                                                    |
| Keywords:                       | Autism, Longitudinal, Adult                                                                                                                                                                                                                                                                                                                                                                                                                                                                                                                                                                                                                                                                                                                                                                                                                                                                                                                                                                                                                                                                                                                                                                                                                                                                                                                                                                                                                                                                                                                                                                                                                                                                                    |
|                                 |                                                                                                                                                                                                                                                                                                                                                                                                                                                                                                                                                                                                                                                                                                                                                                                                                                                                                                                                                                                                                                                                                                                                                                                                                                                                                                                                                                                                                                                                                                                                                                                                                                                                                                                |

1  
2  
3  
4  
5  
6  
7  
8  
9  
10  
11  
12  
13  
14  
15  
16  
17  
18  
19  
20  
21  
22  
23  
24  
25  
26  
27  
28  
29  
30  
31  
32  
33  
34  
35  
36  
37  
38  
39  
40  
41  
42  
43  
44  
45  
46  
47  
48  
49  
50  
51  
52  
53  
54  
55  
56  
57  
58  
59  
60



## Title

Cohort profile: The Australian Longitudinal Study of Adults with Autism (ALSAA)

## Author Names and Affiliations

Samuel R. C. Arnold<sup>\*a,b</sup> <samuel.arnold@unsw.edu.au>

Kitty-Rose Foley<sup>\*b,c</sup> <Kitty-Rose.Foley@scu.edu.au>

Ye In (Jane) Hwang<sup>a,b</sup> <jane.hwang@unsw.edu.au>

Amanda L. Richdale<sup>b,d</sup> <A.Richdale@latrobe.edu.au>

Mirko Uljarevic<sup>e,d,b</sup> <mirkoulj@stanford.edu>

Lauren P. Lawson<sup>b,d</sup> <L.Lawson@latrobe.edu.au>

Ru Ying Cai<sup>b,d</sup> <R.Cai@latrobe.edu.au>

Torbjorn Falkmer<sup>b,f</sup> <T.Falkmer@curtin.edu.au>

Marita Falkmer<sup>b,f,g</sup> <Marita.Falkmer@curtin.edu.au>

Nick Lennox<sup>b,h</sup> <n.lennox@uq.edu.au>

Anna Urbanowicz<sup>b,h,i</sup> <a.urbanowicz@rmit.edu.au>

Julian N. Trollor<sup>+a,b</sup> <J.Trollor@unsw.edu.au>

## Affiliations

- a- Department of Developmental Disability Neuropsychiatry (3DN), UNSW Sydney, New South Wales, Australia
- b- Cooperative Research Centre for Living with Autism (Autism CRC), Brisbane, Queensland, Australia
- c- School of Health and Human Sciences, Southern Cross University, Gold Coast, Bilinga, Queensland, Australia
- d- Olga Tennison Autism Research Centre, School of Psychology and Public Health, La Trobe University, Bundoora, Victoria, Australia
- e- Stanford Autism Center, Division of Child and Adolescent Psychiatry, Department of Psychiatry and Behavioral Sciences, School of Medicine, Stanford University.

- 1  
2  
3 f- School of Occupational Therapy, Social Work and Speech Pathology, Curtin  
4 University, Perth, Western Australia, Australia  
5  
6 g- School of Education and Communication, CHILD Programme, Institution of  
7 Disability Research, Jonkoping University, Jonkoping, Sweden  
8  
9  
10 h- Queensland Centre for Intellectual and Developmental Disability, Mater Research  
11 Institute - UQ, The University of Queensland, South Brisbane, Queensland, Australia  
12  
13 i- Health, Society & Medicine Research Program, Social and Global Studies Centre,  
14 RMIT University  
15  
16

17 \*Joint first author

18  
19 +Corresponding author  
20  
21  
22  
23  
24  
25

26 Correspondence concerning this article should be addressed to Prof. Julian Trollor,  
27 Department of Developmental Disability Neuropsychiatry (3DN), 34 Botany St, UNSW  
28 Sydney, 2052, New South Wales, Australia. Telephone: +61-2-9931-9160. Email:  
29 [j.trollor@unsw.edu.au](mailto:j.trollor@unsw.edu.au)  
30  
31  
32  
33  
34  
35  
36  
37  
38  
39  
40  
41  
42  
43  
44  
45  
46  
47  
48  
49  
50  
51  
52  
53  
54  
55  
56  
57  
58  
59  
60

## Abstract (300 Words)

### *Purpose*

There is a significant knowledge gap regarding the lives of adults on the autism spectrum. Some literature suggests significant health and mental health inequalities for autistic adults, yet there is a lack of comprehensive longitudinal studies exploring risk factors. Further, most research does not include the perspective of autistic adults in its conduct or design. Here we describe the baseline characteristics and inclusive research approach of a nationwide longitudinal study.

### *Participants*

The Autism CRC's ALSAA is a questionnaire-based longitudinal study of autistic adults (25+ years old) with follow-up at 2-year intervals. Autistic advisors were involved in each stage of research apart from data analysis. Three questionnaires were developed: self-report, informant report (i.e. proxy report), and carers (i.e. carer experiences and characteristics).

### *Findings to date*

An inclusive research protocol was developed and agreed with autistic advisors. Baseline data were collected from 295 autistic adults ( $M=41.8$  years,  $SD=12.0$ ) including 42 informant responses, 146 comparison participants, and 102 carers. The majority of autistic participants (90%) had been diagnosed in adulthood ( $M=35.3$  years,  $SD=15.1$ ). When compared to controls, autistic adults scored higher on self-report measures of current depression and anxiety. Participant comments informed on-going data gathering. Participants commented on questionnaire length, difficulty with literal interpretation of forced response items, and expressed gratitude for research in this area.

### *Future plans*



1  
2  
3 A large comprehensive dataset relating to autistic adults and their carers has been gathered,  
4  
5 creating a good platform for longitudinal follow-up repeat surveys and collaborative research.  
6  
7 Several outputs are in development, with focus on health service barriers and usage,  
8  
9 caregivers, impact of diagnosis in adulthood, further scale validations, longitudinal analyses  
10  
11 of loneliness, suicidal ideation, mental illness risk factors and other areas. Baseline data  
12  
13 confirms poorer mental health of autistic adults. The ALSAA demonstrates a working  
14  
15 approach to inclusive research.  
16  
17  
18  
19  
20  
21  
22  
23  
24  
25  
26  
27  
28  
29  
30  
31  
32  
33  
34  
35  
36  
37  
38  
39  
40  
41  
42  
43  
44  
45  
46  
47  
48  
49  
50  
51  
52  
53  
54  
55  
56  
57  
58  
59  
60

### Strengths and limitations of this study

- Autism related research efforts and funding has typically focused on the period from infancy to mid childhood, this research focuses on autistic adults and their carers.
- The ALSAA uses an inclusive research approach to gather a comprehensive range of measures addressing identified research priorities.
- A large proportion of the ALSAA sample at Time 1 were female, including 50% ( $n=149$ ) of autistic and 80% ( $n=117$ ) of non-autistic participants.
- Participants self-report their autism diagnosis, and a subsample ( $n=32$ ) are not yet formally diagnosed.
- The ALSAA is a unique resource for exploring multiple research questions regarding the lives of Australian autistic adults.

## Introduction

Although autism is a lifelong condition, most autism related research efforts and funding has focused on the period from infancy to mid childhood<sup>1</sup>. The best available evidence suggests an adult population prevalence of at least 1.1%<sup>2</sup>. It is likely that autism is under-recognized or under-diagnosed in adults<sup>3,4</sup>, particularly in women without intellectual disability<sup>2,5</sup>.

Although an emerging body of research explores outcomes and support needs of autistic individuals beyond childhood and adolescence, studies including autistic adults remain frequently focused on younger adults<sup>6-8</sup>. This is reflected in recent commentary from an autistic researcher; “We know virtually nothing about what happens to us, autistic people, physically, cognitively, emotionally and socially as we pass through middle and older age”<sup>9</sup>(p515).

The growing body of evidence suggests higher rates of physical and mental health conditions, increased mortality and higher rates of intellectual disability than in the general population<sup>10</sup>. Autistic adults have higher prevalence of chronic medical conditions, including conditions such as stroke, vision and hearing impairments, and Parkinson’s disease<sup>11-14</sup>. These outcomes are experienced by many autistic adults regardless of intellectual functioning<sup>7</sup>. It has been reported that between 25%-84% of autistic adults have a diagnosed mental health condition, with depression and anxiety the most commonly reported conditions<sup>15-19</sup>. Autistic adults have higher rates of suicide<sup>16,20</sup>, increased mortality and reduced life expectancy<sup>21</sup>. Despite widespread acknowledgement of the comorbidity between autism and intellectual disability, prevalence estimates of intellectual disability in autism and vice versa have been inconsistent<sup>22</sup>. Earlier studies report that between 40 to 70% of those with autism also have an intellectual disability<sup>23-25</sup> though a more recent study reports fewer adults on the autism spectrum as having intellectual disability<sup>2</sup> and intelligence tests may underestimate performance of autistic individuals<sup>26</sup>.

1  
2  
3 Studies investigating outcomes related to daily activities and participation are also scarce<sup>27</sup>.  
4  
5 Available studies report low employment rates<sup>28</sup>, low community inclusion and limited social  
6  
7 relationships for autistic adults<sup>29-33</sup>. A few studies have suggested that factors such as low  
8  
9 childhood IQ, autism severity, psychopathology, social and language development, and  
10  
11 access to services and intervention programs may be determinates of such outcomes <sup>29, 34</sup>;  
12  
13 however, much remains to be understood about the sources of variability in these outcomes.  
14  
15  
16  
17 In general, much of the research remains limited by cross-sectional designs, mixed groups  
18  
19 with and without intellectual disability, and a focus on adults aged under 40 <sup>7, 34-36</sup>.  
20  
21  
22 Longitudinal studies are crucial for exploring changing requirements over time and to inform  
23  
24 services how best to respond to the needs of autistic adults<sup>9, 37</sup>. Whilst most studies have  
25  
26 focused on one aspect of life or outcomes, such as physical or mental health comorbidities<sup>12,</sup>  
27  
28 <sup>15, 38</sup> or quality of life<sup>30, 39</sup>, very few comprehensive evaluations of health, wellbeing and  
29  
30 participation have been conducted<sup>34</sup>. Further, research funding does not match priorities  
31  
32 identified by autistic adults, which include research on public services, improving life skills  
33  
34 and the future for autistic adults<sup>40</sup>.  
35  
36  
37  
38

39  
40 The majority of existing autism research is also limited by a lack of inclusive research  
41  
42 practices. There is a small but growing body of research on inclusive practices and co-  
43  
44 production in disability research with increasing examples in the autism field<sup>41-43</sup>. In  
45  
46 principle, inclusive research must “address issues that really matter” to people with disability,  
47  
48 “must access and represent their views and experiences” and people “need to be treated with  
49  
50 respect by the research community”<sup>44(p16)</sup>. Inclusive research encompasses a variety of  
51  
52 approaches, from including the individuals with the disability as advisors or consultants, to  
53  
54 working alongside academic researchers, or initiating or conducting the project as researchers  
55  
56 themselves<sup>45</sup>. Due to a history of mistrust between researchers and autism self-advocacy  
57  
58 groups, inclusive methods are especially important in research involving adults on the  
59  
60

1  
2  
3 spectrum<sup>46</sup>. Inclusive approaches ensure scientific findings are meaningful to the autism  
4  
5 community and sensitive to the lived experiences of individuals on the spectrum<sup>47, 48</sup>.  
6  
7

8  
9 The Cooperative Research Centre for Living with Autism (Autism CRC) Australian  
10  
11 Longitudinal Study of Adults with Autism (ALSAA) is Australia's first national longitudinal  
12  
13 study involving autistic adults aged 25 years and older. The ALSAA will contribute needed  
14  
15 longitudinal data across a range of health, functioning and participation domains. Data  
16  
17 gathered aligns with the research gaps identified above, and the priorities identified by  
18  
19 autistic adults<sup>49</sup>. In comparison to current international longitudinal studies of autistic  
20  
21 adults<sup>50-52</sup> the ALSAA gathers a wider range of data points using standardised measures and  
22  
23 importantly included autistic adults in study design from the early stages of the project.  
24  
25 Further, the ALSAA gathers data from a community comparison group which is often lacking  
26  
27 in prior work. The ALSAA will contribute to the validation of several standardised measures  
28  
29 for this population. Importantly, the ALSAA gathers data specific to the unique context and  
30  
31 service systems within Australia, pertinent given the recent introduction of the National  
32  
33 Disability Insurance Scheme (NDIS) and the considerable differences in approaches to  
34  
35 healthcare and disability across countries. The ALSAA primarily aims to identify and  
36  
37 comprehensively describe the profiles of Australian autistic adults and to compare them to a  
38  
39 control group. Longitudinal data will further allow the determination of predictors versus  
40  
41 correlates across a range of outcomes. The aims of this paper are to describe the  
42  
43 methodological processes and the inclusive protocol adopted in the ALSAA, as well as to  
44  
45 present participant characteristics and feedback from the baseline data collection.  
46  
47  
48  
49  
50  
51  
52

## 53 **Cohort Description**

### 54 *Design*

55  
56  
57  
58  
59  
60

1  
2  
3 The ALSAA is a questionnaire-based, prospective, longitudinal cohort study with a planned  
4  
5 2-year follow-up and further follow-ups as resources allow. Initial design and development of  
6  
7 the ALSAA occurred in collaboration with researchers and clinical health professionals  
8  
9 across Australia, including close collaboration with the Autism CRC longitudinal Study of  
10  
11 Australian School Leavers with Autism (SASLA)<sup>53</sup>. Brief consultation also occurred with  
12  
13 international experts and researchers conducting similar longitudinal studies. Additionally,  
14  
15 preliminary work on factors influencing the research participation of autistic adults<sup>54</sup>  
16  
17 influenced the ALSAA design, including ensuring opportunities for participants to clarify  
18  
19 questions, receive regular study newsletters, and space for participants to provide  
20  
21 explanations regarding their responses.  
22  
23  
24  
25  
26  
27  
28  
29

### 30 *Patient and Public Involvement*

31  
32  
33 *How was the development of the research question and outcome measures informed by*  
34  
35 *patients' priorities, experience, and preferences?*  
36  
37

38  
39 The ALSAA was developed with input from a research advisory network, initially consisting  
40  
41 of 6 autistic adults and 2 family members/carers of autistic adults who helped develop the  
42  
43 surveys to ensure the questions were relevant, accessible and valid.  
44  
45

46  
47 *How did you involve patients in the design of this study?*  
48

49  
50 The ALSAA Inclusive Research Protocol was developed based on the principles of inclusive  
51  
52 research<sup>55</sup>, the Autism CRC report *Inclusive Research Practice Guides and Checklists for*  
53  
54 *Autism Research*<sup>56</sup> (e.g. Checklist 3: Practices that Support Inclusion of Individuals on the  
55  
56 Autism Spectrum in Advisory and Reference Groups), and procedures similar to those  
57  
58  
59  
60

1  
2  
3 employed by Nicolaidis and colleagues<sup>57</sup> (e.g. choosing research questions, adapting data  
4 collection instruments, interpreting results) (see Table 1).  
5  
6  
7

8 *Were patients involved in the recruitment to and conduct of the study?*  
9

10  
11 Since the commencement of the ALSAA, this inclusive research protocol has been reviewed  
12 by seven of the autistic advisors and one carer advisor and has guided the interactions  
13 between researchers and advisors in the development of baseline outputs and the 2-year  
14 follow-up design. Specifically, in the design stage of the ALSAA, members of the advisory  
15 network were asked to identify ambiguous or inappropriate language, formatting issues and  
16 measures which they thought may be interpreted inappropriately or differently due to poor  
17 clarity or wording. An expanded group of eleven advisors had greater input in designing the  
18 2-year follow-up, including the selection of focus topic areas. As per the protocol advisors are  
19 given forewarning, then one month to respond to most requests from the research team, with  
20 more response time as needed. Advisors have provided feedback on ongoing research outputs  
21 critiquing interpretations of findings suggested by the researchers. In Time 2 data gathering  
22 and analyses, compensation has been made available for advisors' time, upon request to the  
23 Autism CRC, which has become increasingly supportive of co-production approaches.  
24  
25 Advisors are now offered an hourly rate for each time they are consulted, with most  
26 consultations limited to two hours, though several advisors still prefer to volunteer and do not  
27 request compensation on most occasions. Advisors to date have not been involved in data  
28 analysis, though several co-produced peer-research projects are currently underway.  
29  
30 Advisors have also assisted in promoting recruitment materials particularly through social  
31 media.  
32  
33  
34  
35  
36  
37  
38  
39  
40  
41  
42  
43  
44  
45  
46  
47  
48  
49  
50  
51  
52  
53  
54  
55

56 *How will the results be disseminated to study participants?*  
57  
58  
59  
60

1  
2  
3 The ALSAA sends quarterly digital newsletters to all participants. Newsletters include lay  
4 summaries of any publications, conference presentations or other outputs developed using the  
5 ALSAA data. They also typically contain general interest highlight(s) relating to the autism  
6 or autistic community, recruitment calls for other autism research, as well as a team member  
7 profile of an ALSAA researcher or autistic advisor.  
8  
9  
10  
11  
12  
13  
14  
15  
16  
17  
18

19 **[Insert Table 1 here]**  
20

### 21 *Participants*

22  
23  
24 There are three participant groups in the ALSAA: autistic adults, non-autistic general  
25 community comparison controls, and carers of autistic adults. Inclusion criteria required the  
26 control and autistic participants to be aged 25 years or older, live in Australia and have  
27 sufficient English literacy skills to complete the survey, determined during a screening phone  
28 call or online expression of interest (EOI). If an autistic individual was unable or preferred  
29 not to self-report, they were given the option to ask an informant to complete an informant  
30 version of the survey on their behalf. People with intellectual disability could complete the  
31 self-report survey with support or participate via an informant respondent.  
32  
33  
34  
35  
36  
37  
38  
39  
40  
41  
42  
43

44 Informant respondents and carers needed to be 18 years or older, have sufficient English  
45 literacy skills, live in Australia and be able to report on the life of the autistic person. The  
46 content of the informant survey is slightly different to the self-report survey (see Table 2) due  
47 to some measures, such as the Patient Health Questionnaire-9 (PHQ-9)<sup>58</sup>, having no  
48 informant version available. Carers, including family members and support people for the  
49 ALSAA, were defined as people who provided unpaid care and support to either a family  
50 member (including spouse) or friend who is on the autism spectrum. This is based on the  
51  
52  
53  
54  
55  
56  
57  
58  
59  
60



widely accepted definition proposed by Carers Australia

(<http://www.carersaustralia.com.au/about-carers/>).

### *Survey*

Three versions of the survey were developed: 1) self-report, for autistic adults and non-autistic controls, 2) informant, for carers/support people to complete about the autistic person who is unable to, or does not want to self-complete, and 3) carer survey for carers/support people/family members to complete about their own health and wellbeing. Surveys could be completed via a paper copy or online. The paper copy was also available in large print. The surveys involved a comprehensive range of measures (see Table 2). In selecting measures, preference was given to measures that had been previously used or had established validity with people on the spectrum and to those deemed suitable by the autistic advisors. Most measures have not been specifically validated for autistic adults, with notable recent exceptions of the WHOQOL BREF<sup>51</sup>, SF-12<sup>59</sup> and the RBQ-2A<sup>60</sup>, while the PHQ-9<sup>61</sup> was more recently validated using a combined ALSAA and SASLA data set.

**[Insert Table 2 here]**

Each survey also contained closing feedback items, asking if any questions were confusing, difficult, or upsetting, and any additional topics that should be included. It also asked how long the survey took to complete (open-ended response), and an overall satisfaction with the survey rated on a 5-point Likert scale. A final item asked for any further feedback.

### *Procedure*

#### *Piloting*

Four autistic adults piloted the self-report questionnaire and two caregivers piloted the carer and the informant questionnaires. Volunteers received two copies, one copy to complete, with

1  
2  
3 data recorded where possible in the ALSAA dataset, and the other for their feedback.

4  
5 Considerable changes to each version of the survey were undertaken in response to feedback  
6  
7 from the autistic advisors and volunteers, including removing the Communication Checklist –  
8  
9 Adult<sup>62</sup>, formatting changes and changes to item wordings where the item did not belong to  
10  
11 an existing standardised tool.  
12  
13

#### 14 15 *Recruitment and Follow-up*

16  
17  
18 A recruitment target of 160 autistic adults was set to allow for regression analyses using  
19  
20 multiple predictor variables. Power analyses, undertaken using power calculation software,  
21  
22 suggested this would be a sufficient sample size with power (1 -  $\beta$ ) set at .80 and  $\alpha = .05$  to  
23  
24 detect a Cohen's  $f^2$  effect size estimate of at least .1 using multiple regression models with 7  
25  
26 predictors. Participants were recruited via advertisements through autism-specific  
27  
28 organisations, disability organisations, autism self-advocacy groups, employment services,  
29  
30 universities, Technical and Further Education (TAFE) institutes, psychology and allied health  
31  
32 private practices, carer organisations, and online autism communities. In attempts to gather a  
33  
34 sample more closely matched to Australian population estimates<sup>63</sup>, additional recruitment  
35  
36 activities targeted adults on the spectrum with intellectual disability, and males without  
37  
38 autism. General community members, autistic adults and carers of autistic adults who were  
39  
40 willing to participate in the ALSAA contacted the research team based at The University of  
41  
42 New South Wales (UNSW Sydney) via telephone, email or through completing a short online  
43  
44 EOI. After eligibility screening, their details were added to the participant database and they  
45  
46 were mailed a paper copy or emailed a link to their survey depending on their preference.  
47  
48  
49  
50  
51

52  
53  
54 Due to a high number of responses and advice from autistic advisors, participants who self-  
55  
56 identified as being autistic, but did not have a formal diagnosis, representing the hidden  
57  
58 population and 'lost generation'<sup>3</sup> of autistic adults, were also recruited. Formally diagnosed  
59  
60

1  
2  
3 participants were asked to provide details of their diagnosis, year of diagnosis, and the  
4 discipline and name of the practitioner(s) who diagnosed them. AQ-short cut-off scores (>65,  
5 sensitivity .97, specificity .82)<sup>64</sup> also support diagnostic status. Given critiques of  
6 applicability and validity of the AQ-short<sup>65, 66</sup>, we plan to include the Ritvo Autism and  
7 Asperger Diagnostic Scale-14 (RAADS-14)<sup>66</sup> in future data gathering. At the planned two-  
8 year average Time 2 follow-up copies of participants' diagnostic reports will be requested,  
9 with a project undertaken to review and categorise the reports. From November 2017 through  
10 2019 participants are being recontacted using contact details provided and considering their  
11 communication preferences that were recorded.

### 12 *Ethical Considerations*

13  
14 Participants were supplied with the appropriate Participant Information Statement and  
15 Consent Form (PISCF). For the online survey, participants were asked to confirm their  
16 consent at commencement, marking checkboxes prior to proceeding. Consent was inferred  
17 from participants who completed and returned paper copies of the survey, as outlined in their  
18 PISCF. In the case where the autistic adult had an intellectual disability a checklist for  
19 capacity to provide consent was used. This checklist was completed by the carer/next of kin;  
20 it was adapted from a checklist developed for use in the Study of Ageing in Intellectual  
21 Disability (SAGE)<sup>67</sup>. The checklist asks several question relating to the person's ability to  
22 understand the study, benefits and risks, withdrawal and complaints, to determine if a person  
23 responsible consent should be obtained additionally or separately. The study was approved by  
24 the Human Research Ethics Committee at UNSW Sydney, Australia (No. HC15001).

### 25 *Data storage*

26  
27 Online questionnaire data were entered directly by participants into Qualtrics Online Survey  
28 Software (<https://www.qualtrics.com/>), whereas returned paper copy surveys were entered  
29  
30

1  
2  
3 into Qualtrics by a researcher or research assistant. Data from Qualtrics, re-identifiable by  
4 participation code, were stored on password-protected UNSW Sydney servers. Recently,  
5  
6 participation code, were stored on password-protected UNSW Sydney servers. Recently,  
7  
8 ethics approval for establishment of a databank for the ALSAA data, to allow collaboration  
9  
10 with external researchers, has been obtained.  
11

### 12 13 *Statistical analysis*

14  
15  
16 STATA Statistical Analysis Software 14<sup>68</sup> and IBM SPSS Statistics 22<sup>69</sup> were used for  
17  
18 cleaning, coding, and statistical analyses. For the current manuscript, STATA was used to  
19  
20 obtain descriptive statistics regarding recruitment, participant feedback, and participant  
21  
22 characteristics, with the level of significance  $<.05$ . No correction was applied for multiple  
23  
24 statistical tests in this manuscript, as the purpose was to explore baseline differences in the  
25  
26 cohorts, and determine potential variables that may be useful covariates or possible  
27  
28 confounders in later hypothesis testing<sup>70</sup>. For describing this cohort profile, listwise deletion  
29  
30 was used for specific analyses when data were missing completely at random, after checking  
31  
32 for difference in demographics and AQ score for dropped participants where appropriate.  
33  
34 Subsample sizes are noted throughout. Data were checked for kurtosis and skew. Non-  
35  
36 parametric Spearman rank correlation was used to determine the correlation between time  
37  
38 taken to complete the self-report survey and level of satisfaction.  
39  
40  
41  
42  
43  
44

### 45 *Recruitment statistics*

46  
47  
48 Recruitment commenced in July 2015. At the close of Time 1 data gathering in November  
49  
50 2017, 345 autistic adults, 221 non-autistic adults, 185 carers, and 78 informants had  
51  
52 registered their interest in the study. Of these, 237 autistic adults, 130 non-autistic adults, 100  
53  
54 carers, and 42 informant reporters completed the entire survey. Overall, a total of 295 autistic  
55  
56 adults participated including all survey formats and partial survey completions. A small  
57  
58 proportion of participants were deemed ineligible during screening (see Table 3), generally  
59  
60

1  
2  
3 due to being under 25 years, not caring for an adult aged 25+ years old, or being located  
4 outside of Australia. Participants were recorded as partial completions if at close of Time 1  
5 their surveys contained the initial demographic items completed and some additional useable  
6 data. From available data there was no significant difference in binary gender,  $\chi^2(4, n=337) =$   
7  $1.07, p=.898$ , or approximate age [ $F(4, 4) = 2.04, p=.09$ ] based on survey commencement,  
8 eligibility or completion status for the self-reporting autistic adults (see Table 1). These non-  
9 significant results were also found for the non-autistic adults across gender,  $\chi^2(4, n=215)$   
10  $=6.98, p=.137$ , and age [ $F(4, 4) = 0.96, p=.43$ ].  
11  
12  
13  
14  
15  
16  
17  
18  
19  
20  
21  
22  
23  
24  
25

26 **[Insert Table 3 here]**

27  
28  
29 *Time taken to complete, and satisfaction with, the survey*

30  
31  
32 Participants reported varying times taken to complete the entire survey. Self-reporting autistic  
33 participants reported between 20 minutes and 12 hours to complete with an average time of  
34 156 minutes ( $n=164, SD=111$ ), though several responses ( $n=53$ ) were not easily convertible  
35 to numeric values for analysis, for example “few days”, “no idea”, or no response to the item  
36 ( $n=36$ ). Non-autistic, self-reporting participants reported a range of 20 minutes to 5 hours  
37 with an average time of 106 minutes ( $n=98, SD=74$ ). This was significantly less than self-  
38 reporting autistic adults despite their completing almost all the same measures and domains,  
39  $t(260)=-4.94, p<.001$ . Carers took 75 minutes on average ( $n=81, SD=62$ ) and informant  
40 responders took 103 minutes on average ( $n=27, SD=54$ ) to complete surveys. Most  
41 participants (64%,  $n=482$ ) reported that they were satisfied or very satisfied with the survey;  
42 few participants were dissatisfied (6%) (Figure 1). There was no association between time  
43 taken to complete the self-report survey and level of satisfaction ( $n=262, r_s = .10, p=.09$ ), and  
44 no difference in satisfaction based on survey type,  $\chi^2(9, n=482) = 11.2, p=.26$ .  
45  
46  
47  
48  
49  
50  
51  
52  
53  
54  
55  
56  
57  
58  
59  
60

[Insert Figure 1 here]

Across self-reporting autistic adults, the most common negative feedback related to difficulty with literal interpretations of forced response items ( $n=38$ ) where participants felt the options provided did not match their circumstances, or to the length of the survey ( $n=17$ ). Several participants provided feedback that they were grateful for research in this area ( $n=27$ ). Many additional topics of interest were suggested, with the most common being relationships, bullying, gender and sexuality, a more detailed employment section. The potential removal of some questionnaires (e.g., the Brief COPE) was also commented on. Revision of items referring to social supports was suggested, as some participants found these upsetting ( $n=12$ ) and / or confusing ( $n=7$ ), with comments such as “I had to really think about my social circle and realised the limited number of truly reliable and trustworthy friends I actually have, which was kind of depressing”.

#### *Summary of participant characteristics*

The age of autistic participants ranged from 25 to 80 years, with a high proportion of females (50%,  $n=295$ ) across all autistic samples. Across all autistic participants 36% were living as a couple with 25% of the sample currently married. Over half (57%,  $n=42$ ) of the informant report sample lived with their parents (see Table 4), in contrast to self-reporting autistic adults who most frequently lived as a couple (45%,  $n=295$ ) or alone (26%,  $n=295$ ). Self-reporting autistic adults did not differ from control participants on rural / remoteness according to Australian Statistical Geography Standard-Remoteness Area (ASGS-RA) classification,  $X^2(4, n=378) = 9.36, p=.05$  ( $n=21$  missing), with no control participants and minimal autistic participants living in remote or very remote Australia. Propensity to greater socioeconomic disadvantage according to the postcode-based Socioeconomic Index for Areas (SEIFA) decile approached significance,  $t(376)=2.96, p<.01$  ( $n=21$  missing, NB. SEIFA /

rurality not available for all postcodes), though they were still above average compared to the Australian population. Time 2 data gathering will seek to gather household income data to more accurately determine socioeconomic disadvantage.

Of the formally diagnosed autistic adults ( $n=221$ ), 132 (56%) reported they have a diagnostic report available, with 169 (76%) diagnosed by one clinician and 29 (13%) reporting diagnosis by two or more clinicians ( $n=23$  missing). As shown in Table 5, the majority (97%,  $n=295$ ) of all autistic participants met the AQ-Short cut-off for identifying autism, compared to 30% ( $n=60$ ) of biologically related carers and 22% ( $n=137$ ) of non-autistic control participants. Asperger's syndrome was the most frequently reported formal diagnosis. Self-reporting formally diagnosed autistic participants on average were diagnosed 6.9 years prior to survey completion, and the majority (90%;  $n=217$ , 4 missing) received their diagnosis in adulthood. A preliminary analysis of gender differences for self-reporting autistic adults was also conducted. In comparison to males, self-reporting formally diagnosed females did not differ significantly on age of diagnosis  $t(192)=.39$ ,  $p=.70$  ( $n=4$  missing). Comparing males with females, including non-diagnosed autistic adults, there was no difference in number of individuals currently married or in a defacto relationship,  $X^2(1, n=241) = .8$ ,  $p=.38$ , or in their educational status,  $X^2(2, n=241) = 4.66$ ,  $p=.10$ . Females were significantly different regarding employment status  $X^2(4, n=241) = 18.77$ ,  $p=.001$ , though only relating to the number providing homecare ( $n=19$  female vs.  $n=1$  male, see Table 4).

In the non-autistic control sample, participant ages ranged from 25 to 79 years, with a high proportion (80%,  $n=146$ ) of females. The majority lived as a couple (72%) and were married (62%). The control sample was significantly different from the self-reporting autistic adults (with and without a formal diagnosis) on several demographics including gender,  $X^2(2, n=399) = 26.5$ ,  $p<.001$ , living situation,  $X^2(5, n=399) = 33.2$ ,  $p<.001$ , marital status,  $X^2(8, n=398) = 47.1$ ,  $p<.001$  ( $n=1$  missing), employment status,  $X^2(6, n=367) = 18.3$ ,  $p=.005$  ( $n=32$

1  
2  
3 missing), and higher education status,  $X^2(2, n=399) = 22.4, p<.001$ . The control sample was  
4  
5 also significantly less likely to meet the DSM-IV-TR linked PHQ-9 cut-off for depression,  
6  
7  $X^2(1, n=354) = 54.9, p<.001$  ( $n=45$  missing), less likely meet the DSM5 GAD-A cut-off<sup>71</sup> for  
8  
9 anxiety,  $X^2(1, n=366) = 67.8, p<.001$  ( $n=33$  missing), and less likely to have a history of  
10  
11 psychiatric illness,  $X^2(1, n=384) = 82.1, p<.001$  ( $n=15$  missing), compared to self-reporting  
12  
13 autistic adults. There were no significant differences for self-reporting autistic adults missing  
14  
15 data on the PHQ-9 or DSM5 GAD-A based on age, gender or AQ score.  
16  
17  
18  
19

20  
21 As shown in Table 6, the majority (43%;  $n=98$ , 4 missing) of carers were mothers of an  
22  
23 autistic adult, followed by partners or spouses (23%). Carers' ages ranged from 21 to 78  
24  
25 years. The majority were female (83%,  $n=102$ ), married (66%), and living as a couple (75%).  
26  
27 Carers spent an average 63.4 ( $SD=57.80$ ,  $n=92$ ) hours per week with the adult with autism,  
28  
29 and the average age of the autistic adult cared for was 37.5 years (range 25-96 years,  
30  
31  $SD=13.21$ ). Most carer participants (76%,  $n=102$ ) are linked to a self-report or informant-  
32  
33 report responses.  
34  
35  
36

37 [insert Table 4 here]

38 [insert Table 5 here]

39 [insert Table 6 here]

## 40 41 42 43 44 45 46 Findings to date

47  
48  
49 Using an inclusive research approach, the ALSAA has collected a detailed profile of the  
50  
51 physical and mental health, productivity, wellbeing and health service use of autistic adults  
52  
53 aged 25+ years, and their carers, living in Australia. There were high numbers of recruitment  
54  
55 responses across the four Time 1 survey populations (autistic and control adult self-report,  
56  
57 informant report on autistic adults, carer self-report). The ALSAA Time 1 data has been used  
58  
59  
60



1  
2  
3 in several studies of psychotropic medication use<sup>72</sup>, leisure participation<sup>73</sup>, ageing well<sup>74</sup>,  
4 loneliness<sup>75</sup> and employment<sup>76</sup>. ALSAA and SASLA pooled data has been used to explore  
5 cognitive reappraisal<sup>77</sup>, suicidal ideation<sup>78</sup>, psychometric scale validation<sup>61</sup>, and anxiety and  
6 depression<sup>79</sup>. Several other outputs are in development, with focus on health service barriers  
7 and usage, caregivers, impact of diagnosis in adulthood, further scale validations,  
8 longitudinal analyses of loneliness, suicidal ideation, mental illness risk factors, and other  
9 outputs, meeting the broad aim of the study to describe and compare the profiles of  
10 Australian autistic adults.  
11  
12  
13  
14  
15  
16  
17  
18  
19  
20  
21

### 22 *Participant characteristics*

23  
24  
25 A large number of females on the spectrum ( $n=150$ ) have participated in the ALSAA. This  
26 will provide an opportunity to explore the different expression of autism characteristics in  
27 females without intellectual disability<sup>5, 80</sup>. Similar to findings in other studies<sup>10, 32</sup>, self-  
28 reporting autistic adults had high rates of depression (52%), anxiety (55%), and a frequent  
29 history of psychiatric diagnosis (89%), significantly more than the control sample. They were  
30 less likely to have a university education compared with the control sample.  
31  
32  
33  
34  
35  
36  
37  
38  
39

### 40 *Questionnaire feedback and completion*

41  
42  
43 The length of the surveys may have led to some participants not completing following  
44 registration, or to missing data or only partial completions. Longer survey length has been  
45 linked to lower participation and completion of web-based surveys<sup>81, 82</sup>. Despite emphasising  
46 the ability to complete over several sessions, some participants commented that the survey  
47 was “too long”. In contrast, survey length was not identified as an issue during pilot testing,  
48 time to complete was not related to survey satisfaction, and some participants appreciated the  
49 comprehensive nature of the surveys. Suggestions made in questionnaire feedback will be  
50 incorporated in the design of the 2-year follow up. Follow-up design aims to reduce  
51  
52  
53  
54  
55  
56  
57  
58  
59  
60

1  
2  
3 assessment burden by reducing overall survey length and where appropriate pre-filling  
4 repeated measures such as medical history. Additional areas of interest to the community will  
5 be explored including bullying, relationships and terms used to describe individuals with an  
6 autism spectrum diagnosis.  
7  
8  
9  
10  
11  
12

### 13 **Strengths and limitations**

14  
15  
16 An important strength of the study was the inclusive research approach using autistic  
17 advisors. Frequently missing from autism research and other longitudinal studies, an  
18 inclusive research protocol was developed for the ALSAA in consultation with autistic  
19 advisors (see Table 1) and applied across all stages of the research process apart from the  
20 analysis. Inclusive research has been found to increase the likelihood that findings are  
21 translatable to the real world and focused on areas of need from community perspectives<sup>44</sup>.  
22  
23 Best-practise processes of conducting inclusive research with autistic adults are not well  
24 known, though more resources are becoming available<sup>83</sup>. Although at times advisors'  
25 suggestions were in conflict with each other or beyond the scope of the study, as each advisor  
26 communicated individually with the research team there was no direct conflict between  
27 advisors. Feedback is given to advisors as to what advice has been used or not, and why.  
28  
29 Little literature was available at the time of commencing the ALSAA and processes were  
30 developed iteratively based on understanding of partnering with autistic adults and guidance  
31 from our advisors. Growing relationships with advisors over time, and seeking feedback as to  
32 preferences for collaboration, has led to harmonious collaborative relationships between the  
33 ALSAA researchers and advisors, and will continue to evolve. An important consideration  
34 working with the advisors is the allowance of lead time and processing time, which has  
35 created difficulty for some student projects using ALSAA data. The ALSAA has further  
36 engaged peer researchers in some future outputs, including a study on autistic burnout, and  
37 the co-development of research grant applications for other projects. An additional strength  
38  
39  
40  
41  
42  
43  
44  
45  
46  
47  
48  
49  
50  
51  
52  
53  
54  
55  
56  
57  
58  
59  
60

1  
2  
3 of the ALSAA design is its consideration and partial overlap with several other national and  
4 international studies, for example overlap with the Autism CRC SASLA longitudinal study  
5  
6 allows for a lifespan approach to be taken including data from late adolescence<sup>77</sup>.  
7  
8  
9

10  
11  
12  
13  
14 The ALSAA baseline sample is reflective of the convenience sampling methodology used.  
15  
16 Participants would appear non-representative of the Australian autism population given  
17  
18 approximate postcode-based above average socioeconomic status, a large female gender bias  
19  
20 for both autistic adults and controls, and that most of the autistic sample (85%) does not have  
21  
22 an intellectual disability. Earlier epidemiological estimates of autism<sup>23</sup> would suggest a larger  
23  
24 proportion of people with a diagnosis of autism and intellectual disability and a much higher  
25  
26 male to female ratio, though recent work questions these assumptions<sup>2, 84</sup>. Self-selection in  
27  
28 online surveys can lead to a female gender bias<sup>82</sup>, as also has been noted in other online  
29  
30 autism research<sup>85-87</sup>. Commonly reported as a 4 to 1 male bias<sup>88</sup>, there is suggestion the true  
31  
32 autism gender ratio may be closer to 3 to 1<sup>84</sup> or lower<sup>80</sup> as females with autism are at a higher  
33  
34 risk of being underdiagnosed<sup>3</sup>. Limiting recruitment to participants age 25 years or older,  
35  
36 changing diagnostic practices<sup>89</sup>, in combination with the convenience sampling, has likely led  
37  
38 to the large percentage of participants who had received their autism diagnosis in adulthood.  
39  
40  
41  
42  
43  
44  
45 The majority of the current autistic sample does not have an intellectual disability. Significant  
46  
47 barriers exist for people with intellectual disability to participate in a questionnaire-based  
48  
49 study<sup>90</sup>. An alternative to directly gathering information from adults on the spectrum with  
50  
51 intellectual disability is the participation via an informant respondent. Although an informant  
52  
53 respondent survey was made available for the ALSAA, and despite targeted recruitment  
54  
55 efforts, there was low participation of people with intellectual disability.  
56  
57  
58  
59  
60

1  
2  
3 A final limitation is the self-report questionnaire format of the ALSAA, particularly in  
4 relation to self-reported diagnosis of autism and comorbid conditions without clinical  
5 reassessment. Validating autism diagnosis through clinical reassessment would be a highly  
6 resource intensive exercise in a nationwide study in Australia and is beyond the resourcing  
7 available to this study. This is offset by gathering of additional information relating to autism  
8 diagnosis, including asking if the respondent has a diagnostic report, name and type of  
9 clinician providing diagnosis, and AQ scores. These variables could be used to identify  
10 subsamples with stronger evidence of definite diagnosis of autism for separate analysis where  
11 necessary depending on the specific research question. Further, diagnostic reports from  
12 participants will be requested from participants at follow-up to confirm diagnosis. Gathering  
13 data from adults without a formal diagnosis is potentially a strength, given the 'lost  
14 generation' of autistic adults<sup>3</sup>, significant barriers to diagnosis, and accuracy issues with gold  
15 standard autism assessment tools<sup>91</sup>; these participants could be overlooked in other studies  
16 though they represent an important hidden population group. The self-report format also  
17 prevents the quantification of participants' cognitive ability. The use of standardised mental  
18 health screening measures with clinical cut-offs gathers some information on co-occurring  
19 mental health conditions, though not as reliably as would be available via clinical interview.  
20 Conversely, community-based sampling and use of self-report questionnaires does allow for  
21 gathering a reasonably large sample, offsetting the risk of including people with incorrect  
22 diagnostic data with increased statistical power and the potential severity bias of clinical  
23 samples. Limitations and strengths of the ALSAA study design will largely depend on the  
24 specific research question being explored, with sufficient sample size and data points to  
25 partial-out subgroups and non-matched controls or to account for common method variance  
26 as needed. Future researchers using the ALSAA dataset will need to consider balancing type  
27 1 and type 2 errors<sup>70</sup>. A data governance structure is being established, with requests for  
28  
29  
30  
31  
32  
33  
34  
35  
36  
37  
38  
39  
40  
41  
42  
43  
44  
45  
46  
47  
48  
49  
50  
51  
52  
53  
54  
55  
56  
57  
58  
59  
60

1  
2  
3 ALSAA data requiring researchers to outline a statistical plan and data points they will be  
4  
5 using, which will assist in managing any concerns of multiple statistical testing without  
6  
7 correction.  
8  
9

### 10 *Implications*

11  
12  
13  
14 There is a significant knowledge gap regarding the lives of autistic adults. The ALSAA has  
15  
16 gathered a large comprehensive dataset relating to autistic adults and their carers, creating a  
17  
18 platform for longitudinal follow-up and collaborative research. The ALSAA is an important  
19  
20 resource for exploring multiple research questions regarding the lives of autistic adults.  
21  
22

23 However, as with all longitudinal research caution is required in drawing firm conclusions  
24  
25 from the ALSAA cohort in relation to the entire Australian autism population. Nevertheless,  
26  
27 this cohort provides the first opportunity to explore longitudinal outcomes of Australian  
28  
29 autistic adults. Having offline and informant versions of questionnaires, and questionnaires  
30  
31 reviewed by autistic advisors, facilitates greater accessibility for participants on the spectrum  
32  
33 and their carers.  
34  
35  
36

37  
38 The ALSAA study demonstrates a working approach to inclusive research with autistic  
39  
40 advisors. The inclusive research protocol developed in this study provides a useful basis for  
41  
42 other research endeavours. Following this protocol, future outputs such as peer-reviewed  
43  
44 manuscripts, presentations and reports from the ALSAA will also be developed in  
45  
46 consultation with autistic advisors or autistic peer researchers. Input from autistic advisors  
47  
48 has already improved the quality and relevance of initial outputs<sup>72</sup>, for example identifying  
49  
50 potential alternative interpretations of findings based on lived experiences, potential  
51  
52 differences in autistic interpretations of scale items, and modifying the methodology in one  
53  
54 instance<sup>75</sup> changing a purely quantitative study into a mixed methods design.  
55  
56  
57  
58  
59  
60

1  
2  
3 Some measures used in the ALSAA have not yet been validated with autistic adult samples  
4  
5 (e.g., DSM5 GAD-A, Emotion Regulation Questionnaire, PHQ-15). The ALSAA provides  
6  
7 the opportunity to explore the validity of these commonly used measures.  
8  
9

### 10 **Collaboration**

11  
12  
13  
14 International studies involving autistic adults and utilising standardised measures are  
15  
16 underway in the United States, Netherlands and United Kingdom (e.g., SPARK  
17  
18 <http://sparkforautism.org>, AASPIRE <https://aaspire.org/>, the Netherlands Autism Register  
19  
20 <https://www.nederlandsautismeregister.nl> and the Adult Autism Spectrum Cohort-UK  
21  
22 <http://research.ncl.ac.uk/adultautismspectrum/>), though with less comprehensive ranges of  
23  
24 measures. During development of the ALSAA, consultation with international groups  
25  
26 occurred to ensure there were some synergies with these studies. Future international  
27  
28 comparisons will be possible, including pooling of data. This will allow for the creation of  
29  
30 much larger datasets and more in-depth understanding of life in adulthood for autistic people.  
31  
32  
33  
34  
35  
36  
37  
38  
39  
40  
41  
42  
43  
44  
45  
46  
47  
48  
49  
50  
51  
52  
53  
54  
55  
56  
57  
58  
59  
60

## Further details

### Contributors

Manuscript drafting was jointly led by SA & KF. All authors (YH,AR,MU,LL,RC,TF,MF,NL,AU,JT) had a role in the conduct of the research, interpretation of results, drafting of manuscript and critical review of the manuscript. SA, KF, YH, AR, MU & JT conducted data analysis and reporting. KF, YH, AR, MU, RC, TF, MF, NL, AU & JT were involved in the conceptualisation of the study.

### Data Sharing Statement

Processes to establish data banking and sharing procedures are currently being finalised. Please email the corresponding author regarding queries.

### Ethics approval

The study was approved by the Human Research Ethics Committee at UNSW Sydney, Australia (No. HC15001).

### Acknowledgements

The authors also acknowledge the valuable contribution of the Research Advisory Network members Matthew Bennett, Bob Boyce, Jen Harland, Julianne Higgins, Gabriel Nakhel, Joanne Mahony, Andrea Michael, Cheryl Strangio, and Chris Tanner whose insight and recommendations shaped this work. We also gratefully acknowledge the cooperation and participation of all participants on the autism spectrum and their carers involved in this study.

## **Funding**

This work was supported by the Cooperative Research Centre for Living with Autism (Autism CRC), established and supported under the Australian Government's Cooperative Research Centres Program.

## **Conflict of Interest**

The authors have no conflict of interest to report.



## References

1. Seltzer MM, Shattuck PT, Abbeduto L, Greenberg JS. Trajectory of development in adolescents and adults with autism. *Mental Retardation and Developmental Disabilities*. 2004;10:234-47.
2. Brugha TS, Spiers N, Bankart J, Cooper S-A, McManus S, Scott FJ, et al. Epidemiology of autism in adults across age groups and ability levels. *The British Journal of Psychiatry*. 2016/12/01/;209(6):498-503. en.
3. Lai M-C, Baron-Cohen S. Identifying the lost generation of adults with autism spectrum conditions. *The Lancet Psychiatry*. 2015 2015/11/01/;2(11):1013-27.
4. Van Wijngaarden-Cremers PJM, van Eeten E, Groen WB, Van Deurzen PA, Oosterling IJ, Van der Gaag RJ. Gender and Age Differences in the Core Triad of Impairments in Autism Spectrum Disorders: A Systematic Review and Meta-analysis. *Journal of Autism and Developmental Disorders*. 2014 March 01;44(3):627-35.
5. Bargiela S, Steward R, Mandy W. The Experiences of Late-diagnosed Women with Autism Spectrum Conditions: An Investigation of the Female Autism Phenotype. *Journal of Autism and Developmental Disorders*. 2016 2016/10/01/;46(10):3281-94. en.
6. Jang J, Matson JL, Adams HL, Konst MJ, Cervantes PE, Goldin RL. What are the ages of persons studied in autism research: A 20-year review. *Research in Autism Spectrum Disorders*. 2014;8(12):1756-60.
7. Howlin P, Moss P. Adults with autism spectrum disorders. *Canadian Journal of Psychiatry*. 2012;57(5):275-83.
8. Nicolaidis C. Autism in Adulthood: The New Home for Our Emerging Field. *Autism in Adulthood*. 2018;1(1):1-2.
9. Michael C. Why we need research about autism and ageing. *Autism*. 2016;20(5):515-6.
10. Howlin P, Magiati I. Autism spectrum disorder: outcomes in adulthood. *Current Opinion in Psychiatry*. 2017 2017/03//;30(2):69-76. en.
11. Cashin A, Buckley T, Trollor J, Lennox N. A scoping review of what is known of the physical health of adults with autism spectrum disorder. *Journal of Intellectual Disabilities*. 2016.
12. Croen LA, Zerbo O, Qian Y, Massolo M, Rich S, Sidney S, et al. The health status of adults on the autism spectrum. *Autism*. 2015;19(7):814-23.
13. Jones KB, Cottle K, Bakian A, Farley M, Bilder D, Coon H, et al. A description of medical conditions in adults with autism spectrum disorder: a follow-up of the 1980s Utah/UCLA autism epidemiologic study. *Autism*. 2016;5:551-61.
14. Weiss JA, Riosa PB. Thriving in youth with autism spectrum disorder and intellectual disability. *Journal of Autism and Developmental Disorders*. 2015;45:2474-86.
15. Buck TR, Viskochil J, Farley M, Coon H, McMahon WM, Morgan J, et al. Psychiatric comorbidity and medication use in adults with autism spectrum disorder. *Journal of Autism and Developmental Disorders*. 2014;44:3063-71.
16. Hedley D, Uljarević M, Wilmot M, Richdale A, Dissanayake C. Understanding depression and thoughts of self-harm in autism: A potential mechanism involving loneliness. *Research in Autism Spectrum Disorders*. 2018 2018/02/01/;46:1-7.
17. Lever AG, Geurts HM. Psychiatric co-occurring symptoms and disorders in young, middle-aged, and older adults with autism spectrum disorders. *Journal of Autism and Developmental Disorders*. 2016;46:1916-30.
18. Matson JL, Williams LW. Depression and mood disorders among persons with Autism spectrum disorders. *Research in Developmental Disabilities*. 2014;35:2003-7.
19. Moss P, Howlin P, Savage S, Bolton P, Rutter M. Self and informant reports of mental health difficulties among adults with autism findings from a long-term follow-up study. *Autism*. 2015.
20. Hedley D, Uljarević M, Wilmot M, Richdale A, Dissanayake C. Brief Report: Social Support, Depression and Suicidal Ideation in Adults with Autism Spectrum Disorder. *Journal of Autism and Developmental Disorders*. 2017 November 01;47(11):3669-77.

21. Hirvikoski T, Mittendorfer-Rutz E, Boman M, Larsson H, Lichtenstein P, Bolte S. Premature mortality in autism spectrum disorder. *The British Journal of Psychiatry*. 2015.
22. Matson JL, Nebel-Schwalm N. Comorbid psychopathology with autism spectrum disorder in children: an overview. *Research in Developmental Disabilities*. 2007;28:341-52.
23. Fombonne E. Epidemiology surveys of autism and other pervasive developmental disorders: an update. *Journal of Autism and Developmental Disorders*. 2003;33(4):365-82.
24. LaMalfa G, Lassi G, Bertilli M, Salvani R, Placidi GF. Autism and intellectual disability: a study of prevalence on a sample of the Italian population. *Journal of Intellectual Disability Research*. 2004;48:262-7.
25. Matson JL, Shoemaker M. Intellectual disability and its relationship to autism spectrum disorders. *Research in Developmental Disabilities*. 2009;30:1107-14.
26. Dawson M, Soulières I, Gernsbacher MA, Mottron L. The level and nature of autistic intelligence. *Psychol Sci*. 2007;18(8):657-62. PubMed PMID: 17680932. eng.
27. Howlin P, Arciuli J, Begeer S, Brock J, Clarke K, Costley D, et al. Research on adults with autism spectrum disorder: roundtable report. *Journal of Intellectual and Developmental Disability*. 2015;40(4):388-93.
28. Hedley D, Uljarevic M, Cameron L, Halder S, Richdale AL, Dissanayake C. Employment programmes and interventions targeting adults with autism spectrum disorder: a systematic review of the literature. *Autism*. 2016:1-13.
29. Gray KM, Piccin AK, C. M., Taffe J, Parmenter TR, Hofer S, Einfeld S, et al. Outcomes in young adulthood: are we achieving community participation and inclusion? *Journal of Intellectual Disability Research*. 2014;58(8):734-45.
30. Henninger NA, Taylor JL. Outcomes in adults with autism spectrum disorders: a historical perspective. *Autism*. 2013;17(1):103-16.
31. Howlin P, Moss P, Savage S, Rutter. Social outcomes in mid- to later adulthood among individuals diagnosed with autism and average nonverbal IQ as children. *Journal of American Academy of Child & Adolescent Psychiatry*. 2013;52(6):572-81.
32. Magiati I, Tay XW, Howlin P. Cognitive, language, social and behavioural outcomes in adults with autism spectrum disorders: a systematic review of longitudinal follow-up studies in adulthood. *Clinical Psychology Review*. 2014;34:73-86.
33. Marriage S, Wolverton A, Marriage K. Autism spectrum disorder grown up: A chart review of adult functioning. *Journal of the Canadian Academy of Child and Adolescent Psychiatry*. 2009;18(4):322.
34. Levy A, Perry A. Outcomes in adolescents and adults with autism: a review of the literature. *Research in Autism Spectrum Disorders*. 2011;5:1271-82.
35. Seltzer MM, Krauss MW, Shattuck PT, Orsmond GI, Swe A, Lord C. The symptoms of autism spectrum disorders in adolescence and adulthood. *Journal of Autism and Developmental Disorders*. 2003;33:565-81.
36. Shattuck PT, Selter MM, Greenberg JS, Orsmond GI, Bolt D, Kring S, et al. Change in autism symptoms and maladaptive behaviors in adolescents and adults with an autism spectrum disorder. *Journal of Autism and Developmental Disorders*. 2007;37:1735-47.
37. Happe F, Charlton RA. Aging in autism spectrum disorders: a mini-review. *Gerontology*. 2010;58:70-8.
38. Totsika V, Felce D, Kerr M, Hastings RP. Behaviour problems, psychiatric symptoms, and quality of life for older adults with intellectual disability with and without autism. *Journal of Autism and Developmental Disorders*. 2010;40:1171-8.
39. Khanna R, K. J-P, West-Strum D, Mahabaleshwarkar R. Health-related quality of life and its determinants among adults with autism. *Research in Autism Spectrum Disorders*. 2014;8(3):157-67.
40. Pellicano E, Dinsmore A, Charman T. What should autism research focus upon? Community views and priorities from the United Kingdom. *Autism*. 2014:1-5.

- 1
- 2
- 3
- 4 41. Nicolaidis C. What Can Physicians Learn from the Neurodiversity Movement? . American
- 5 Medical Association Journal of Ethics. 2012;14(6):503-10.
- 6 42. Nicolaidis C, Raymaker D, Dern S, Boisclair C, Ashkenazy E, Baggs A. Comparison of
- 7 healthcare experiences in autistic and non-autistic adults: a cross-sectional online survey facilitated
- 8 by an academic-community partnership. *Journal of General Internal Medicine*. 2012;28(6):761-9.
- 9 43. Kapp SK, Steward R, Crane L, Elliott D, Elphick C, Pellicano E, et al. 'People should be allowed
- 10 to do what they like': Autistic adults' views and experiences of stimming. *Autism*.
- 11 2019:1362361319829628.
- 12 44. Walmsley J, Johnson K. Inclusive research with people with learning disabilities: Past,
- 13 present and futures. London and New York: Jessica Kingsley Publishers 2003.
- 14 45. Bigby C, Frawley P, Ramcharan P. Conceptualising inclusive research with people with
- 15 intellectual disability. *Journal of Applied Research in Intellectual Disabilities*. 2014;27(1):3-12.
- 16 46. Bagatell N. From cure to community: transforming notions of autism. *Journal of the Society*
- 17 *for Psychological Anthropology*. 2010;38(1):33-55.
- 18 47. Milton D, Bracher M. Autistics speak but are they heard? *Medical Sociology Online*.
- 19 2013;7:61-9.
- 20 48. Nind M, Vinha H. Doing research inclusively: bridges to multiple possibilities in inclusive
- 21 research. *British Journal of Learning Disabilities*. 2012;42:102-9.
- 22 49. Gatfield O, Mangan C, Haar T, Kinninurgh A, Rodger S. 2016 Research Priorities Survey
- 23 Report. Brisbane, Queensland, Australia: Cooperative Research Centre for Living with Autism, 2016.
- 24 50. Gotham K, Marvin AR, Talyor JL, Warren Z, Anderson CM, Law PA, et al. Characterizing the
- 25 daily life, needs, and priorities of adults with autism spectrum disorder from Interactive Autism
- 26 Network. *Autism*. 2015:1-11.
- 27 51. McConachie H, Mason D, Parr JR, Garland D, Wilson C, Rodgers J. Enhancing the Validity of a
- 28 Quality of Life Measure for Autistic People. *J Autism Dev Disord*. 2018 May;48(5):1596-611. PubMed
- 29 PMID: 29188584. Pubmed Central PMCID: PMC5889785. Epub 2017/12/01. eng.
- 30 52. Seltzer MM, Greenberg JS, Taylor JL, Smith LE, Orsmond GE, Esbensen A, et al. Adolescents
- 31 and adults with autism spectrum disorders. In: Amaral DG, Dawson G, Geschwind D, editors. *Autism*
- 32 *spectrum disorders* New York: Oxford University Press; 2011.
- 33 53. Lawson L, Hascheck A, Richdale AL. SASLA Snapshot: Study of Australian School-Leavers with
- 34 Autism – Baseline Profile. Melbourne, Australia: Olga Tennison Autism Research Centre (OTARC), La
- 35 Trobe University, 2018.
- 36 54. Haas K, Costley D, Falkmer M, Richdale A, Sofronoff K, Falkmer T. Factors Influencing the
- 37 Research Participation of Adults with Autism Spectrum Disorders. *J Autism Dev Disord*. 2016
- 38 May;46(5):1793-805. PubMed PMID: 26810436. Epub 2016/01/27. eng.
- 39 55. Walmsley J. Normalisation, emancipatory research and inclusive research in learning
- 40 disability. *Disability & Society*. 2001;16(2):188-205.
- 41 56. CRC A. Inclusive research practice guide and checklists for autism research: Version 2.
- 42 Brisbane, Queensland: Autism CRC Ltd., 2016.
- 43 57. Nicolaidis C, Raymaker D, Katz M, Oshwald M, Goe R, Leottie S, et al. Community-based
- 44 participatory research to adapt health measures for use by people with developmental disabilities.
- 45 *Progress in Community Health Partnerships: Research, Education, and Action*. 2015;9(2):141-3.
- 46 58. Kroenke K, Spitzer RL, Williams JBW. The PHQ-9: validity of a brief depression severity
- 47 measure. *Journal of General Internal Medicine*. 2001;16:606-13.
- 48 59. Khanna R, K. J-P, West-Strum D. Validity and reliability of the Medical Outcomes Study Short-
- 49 Form Health Survey version 2 (SF-12v2) among adults with autism. *Research in Developmental*
- 50 *Disabilities*. 2015;43-44:51-60.
- 51 60. Barrett SL, Uljarević M, Baker EK, Richdale AL, Jones CRG, Leekam SR. The Adult Repetitive
- 52 Behaviours Questionnaire-2 (RBQ-2A): A Self-Report Measure of Restricted and Repetitive
- 53 Behaviours. *Journal of Autism and Developmental Disorders*. 2015 2015/11/01;45(11):3680-92.
- 54
- 55
- 56
- 57
- 58
- 59
- 60

- 1  
2  
3 61. Arnold SRC, Uljarevic M, Hwang J, Richdale A, Trollor J, Lawson LP. Brief Report:  
4 Psychometric Properties of the Patient Health Questionnaire-9 (PHQ-9) in Autistic Adults. *Journal of*  
5 *Autism and Developmental Disorders*. 2019;1-9.
- 6 62. Whitehouse AJO, Bishop DVM. *Communication checklist - adult*. London: The Psychological  
7 Corporation; 2009.
- 8 63. (AIHW) AloHaW. *Autism in Australia*. Web Report. Canberra, Australia: AIHW, 2017 5-4-17.  
9 Report No.
- 10 64. Hoekstra RA, Vinkhuyzen AAE, Wheelwright S, Bartels M, Boomsma DI, Baron-Cohen S, et al.  
11 The construction and validation of an abridged version of the Autism-Spectrum Quotient. *Journal of*  
12 *Autism and Developmental Disorders*. 2011;41:589-96.
- 13 65. Lundqvist L-O, Lindner H. Is the Autism-Spectrum Quotient a Valid Measure of Traits  
14 Associated with the Autism Spectrum? A Rasch Validation in Adults with and Without Autism  
15 Spectrum Disorders. *Journal of Autism and Developmental Disorders*. 2017 July 01;47(7):2080-91.
- 16 66. Eriksson JM, Andersen LMJ, Bejerot S. RAADS-14 Screen: validity of a screening tool for  
17 autism spectrum disorder in an adult psychiatric population. *Molecular Autism*. 2013  
18 2013/12/09;4(1):49.
- 19 67. Evans E, Trollor J, Davis A, Bhardwaj A, O'Brien E. *Mental health and carer support in elders*  
20 *with ID*. Report to Ageing, Disability and Home Care, Department of Family and Community Services,  
21 NSW Australia. Sydney, Australia: Department of Developmental Disability Neuropsychiatry, UNSW  
22 Sydney, 2015.
- 23 68. StataCorp. *Stata Statistical Software: Release 14*. College Station, TX: StataCorp LP; 2015.
- 24 69. IBM\_Corp. *IBM SPSS Statistics for Windows, Version 22.0*. Armonk, NY: IBM Corp; 2013.
- 25 70. Streiner DL, Norman GR. *Correction for Multiple Testing: Is There a Resolution?* *Chest*. 2011  
26 2011/07/01;140(1):16-8.
- 27 71. Beesdo-Baum K, Klotsche J, Knappe S, Craske MG, LeBeau RT, Hoyer J, et al. Psychometric  
28 properites of the dimensional anxiety scales for DSM-V in an unselected sample of German  
29 treatment seekeing patients. *Depression and Anxiety*. 2012;29(12):1014-24.
- 30 72. Cvejic RC, Arnold SRC, Foley K-R, Trollor JN. Neuropsychiatric profile and psychotropic  
31 medication use in adults with autism spectrum disorder: results from the Australian Longitudinal  
32 Study of Adults with Autism. *BJPsych Open*. 2018;4(6):461-6. Epub 11/13.
- 33 73. Stacey T-L, Froude EH, Trollor J, Foley K-R. Leisure participation and satisfaction in autistic  
34 adults and neurotypical adults. *Autism*. 2018;0(0):1362361318791275. PubMed PMID: 30132680.
- 35 74. Hwang YI, Foley K-R, Trollor JN. Aging Well on the Autism Spectrum: An Examination of the  
36 Dominant Model of Successful Aging. *Journal of Autism and Developmental Disorders*. 2018 May 02.
- 37 75. Ee D, Hwang J, Reppermund S, Srasuebku P, Trollor J, Foley K-R, et al. Loneliness in Adults  
38 on the Autism Spectrum. *Autism in Adulthood*. 2019.
- 39 76. Harsanyi M, Foley K-R, Froude E, Trollor J, Arnold SRC. *Employment Profiles of Autistic Adults*  
40 *in Australia*. 2019.
- 41 77. Cai RY, Richdale AL, Foley K-R, Trollor J, Uljarević M. Brief report: Cross-sectional interactions  
42 between expressive suppression and cognitive reappraisal and its relationship with depressive  
43 symptoms in autism spectrum disorder. *Research in Autism Spectrum Disorders*. 2018  
44 2018/01/01;45:1-8.
- 45 78. Hedley D, Uljarević M, Foley K-R, Richdale A, Trollor J. Risk and protective factors underlying  
46 depression and suicidal ideation in Autism Spectrum Disorder. *Depression and Anxiety*.  
47 2018;35(7):648-57.
- 48 79. Uljarević M, Hedley D, Foley K-R, Magiati I, Cai RY, Dissanayake C, et al. Anxiety and  
49 depression from adolescence to old age in autism spectrum disorder. *Journal of Autism and*  
50 *Developmental Disorders*. 2019.
- 51 80. Baldwin S, Costley D. The experiences and needs of female adults with high-functioning  
52 autism spectrum disorder. *Autism*. 2016;20(4):483-95. PubMed PMID: 26111537.
- 53  
54  
55  
56  
57  
58  
59  
60

81. Fan W, Yan Z. Factors affecting response rates of the web survey: A systematic review. *Computers in Human Behavior*. 2010 2010/03/01/;26(2):132-9.
82. Guo X, Vittinghoff E, Olgin JE, Marcus GM, Pletcher MJ. Volunteer Participation in the Health eHeart Study: A Comparison with the US Population. *Scientific Reports*. 2017 2017/05/16/;7(1):1956. En.
83. Fletcher-Watson S, Adams J, Brook K, Charman T, Crane L, Cusack J, et al. Making the future together: Shaping autism research through meaningful participation. *Autism*. 2019;0(0):1362361318786721. PubMed PMID: 30095277.
84. Loomes R, Hull L, Mandy WPL. What Is the Male-to-Female Ratio in Autism Spectrum Disorder? A Systematic Review and Meta-Analysis. *Journal of the American Academy of Child & Adolescent Psychiatry*. 2017 2017/06/01/;56(6):466-74.
85. Gilmour L, Schalomon PM, Smith V. Sexuality in a community based sample of adults with autism spectrum disorder. *Research in Autism Spectrum Disorders*. 2012 2012/01/01/;6(1):313-8.
86. Kapp SK, Gillespie-Lynch K, Sherman LE, Hutman T. Deficit, difference, or both? Autism and neurodiversity. *Developmental Psychology*. 2013 2013;49(1):59-71. en.
87. Nicolaidis C, Raymaker D, McDonald K, Dern S, Boisclair C, Ashkenazy E, et al. Comparison of healthcare experiences in autistic and non-autistic adults: A cross-sectional online survey facilitated by an academic-community partnership. *Journal of General Internal Medicine*. 2013;28(6):761-9.
88. Whiteley P, Todd L, Carr K, Shattock P. Gender Ratios in Autism, Asperger Syndrome and Autism Spectrum Disorder. *Autism Insights*; London. 2010 2010;2:17. English.
89. Whitehouse AJO, Cooper MN, Bebbington K, Alvares G, Lin A, Wray J, et al. Evidence of a reduction over time in the behavioral severity of autistic disorder diagnoses. *Autism Research*. 2017;10(1):179-87.
90. Chadwick D, Wesson C, Fiullwood C. Internet Access by People with Intellectual Disabilities: Inequalities and Opportunities. *Future Internet*. 2013;5(3):376-97.
91. Fusar-Poli L, Brondino N, Rocchetti M, Panisi C, Provenzani U, Damiani S, et al. Diagnosing ASD in Adults Without ID: Accuracy of the ADOS-2 and the ADI-R. *Journal of Autism and Developmental Disorders*. 2017 2017/11/01/;47(11):3370-9.
92. Robertson AE, Simmons DR. The relationship between sensory sensitivity and autistic traits in the general population. *Journal of Autism and Developmental Disorders*. 2012;43:775-84.
93. Carleton RN, Norton PJ, Asmundson GJG. Fearing the unknown: a short version of the intolerance of uncertainty scale. *Journal of Anxiety Disorders*. 2007;21:105-17.
94. Spitzer RL, Williams JBW, Kroenke K, Linzer M, deGruy FV, Hahn SR. Utility of new procedure for diagnosis mental-disorders in primary-care: the PRIME-MD 1000 study. *Journal of American Medical Association*. 1994;272:1749-56.
95. Ware JE, Kosinski M, Keller SD. A 12-Item Short-Form Health Survey: construction of scales and preliminary tests of reliability and validity. *Medical care*. 1996;34(3):220.
96. Sletten DM, Suarez GA, Low PA, Mandrekar J, Singer W. COMPASS 31: A refined and abbreviated composite autonomic symptom score. *Mayo Clinic Proceedings*. 2012;87(12):1196-201.
97. Buysse DJ, Reynolds CF, Monk TH, Berman SR, Kupfer DJ. The Pittsburgh Sleep Quality Index: a new instrument for psychiatric practise and research. *Psychiatry Reserves*. 1989;28:193-213.
98. Gardisar M, Lack L, Richards H, Harris J, Gallasch J, Boundy M, et al. The Flinders Fatigue Scale: preliminary psychometric properties and clinical sensitivity of a new scale for measuring daytime fatigue associated with insomnia. *Journal of Clinical Sleep Medicine*. 2007;3(7):722-8.
99. Craske MG, Wittchen H-U, Bogels S, Stein M, Andrews G, Lebeu R. Severity measure for Generalized Anxiety Disorder - adult: American Psychiatric Association; 2013.
100. Tennant R, Hiller L, Fishwick R, Platt S, Joseph S, Weich S, et al. The Warwick-Edinburgh mental well-being scale (WEMWBS): development and UK validation. *Health and Quality of Life Outcomes*. 2007;5(63):1-13.
101. Chen G, Gully SM, Eden D. Validation of a new general self-efficacy scale. *Organizational Research Methods*. 2001;4(1):62-83.

- 1  
2  
3 102. Gross JJ, John OP. Individual differences in two emotion regulation processes: implications  
4 for affect, relationships, and well-being. *Journal of Personality and Social Psychology*.  
5 2003;85(2):348-62.  
6  
7 103. Mohr C, Tonge BJ, Einfeld SL, Taffe J. The Developmental Behaviour Checklist for Adults  
8 (DBC-A) Revised. Sydney, Australia: University of Sydney and Monash University, 2011.  
9 104. Carver CS. You want to measure coping but your protocol's too long: consider the brief  
10 COPE. *International journal of behavioral medicine*. 1997;4(1):92-100. PubMed PMID: 16250744.  
11 Epub 1997/01/01. eng.  
12 105. Crook TH, 3rd, Feher EP, Larrabee GJ. Assessment of memory complaint in age-associated  
13 memory impairment: the MAC-Q. *International psychogeriatrics*. 1992 Fall;4(2):165-76. PubMed  
14 PMID: 1477304. Epub 1992/01/01. eng.  
15 106. Hays RD, DiMatteo MR. A short-form measure of loneliness. *Journal of Personality*  
16 *Assessment*. 1987;51:69-81.  
17 107. Sarason IG, Levine HM, Basham RB, Sarason BR. Assessing social support: the social support  
18 questionnaire. *Journal of Personality and Social Psychology*. 1983;44(1):127-39.  
19 108. The WHOQOL Group. The World Health Organization Quality of Life assessment (WHOQOL)-  
20 BREF quality of life assessment. *Psychological Medicine*. 1995;28:551-5.  
21 109. Maenner MJ, Smith LE, Hong J, Makuch R, Greenberg JS, Mailick MR. Evaluation of an  
22 activities of daily living scale for adolescents and adults with developmental disabilities. *Disability*  
23 *and Health Journal* 2013;6(1):8-17.  
24 110. Luciano JV, Ayuso-Mateos JL, Aguado J, Fernandez A, Serrano-Blanco A, Roca M, et al. The  
25 12-item World Health Organisation Disability Assessment Schedule (WHO-DAS II): a nonparametric  
26 item response analysis *BMC Medical Research Methodology*. 2010;10(45):1-9.  
27 111. Taylor JL, Seltzer MM. Developing a vocational index for adults with autism spectrum  
28 disorders. *Journal of Autism and Developmental Disorders*. 2012;42(12):2669-79.  
29 112. Beard JG, Ragheb MG. Measuring leisure satisfaction. *Journal of Leisure Research*.  
30 1980;12:20-33.  
31 113. Chisholm D, Knapp MRJ, Knudsen HC, Amaddeo F, Gaité L, van Wijngaarden B, et al. Client  
32 socio-demographic and service receipt inventory - European version: development of an instrument  
33 for international research. *The British Journal of Psychiatry*. 2000;177:28-33.  
34 114. Bengston VL, Allen KR. The life course perspective applied to families overtime. In: Boss P,  
35 Doherty W, LaRossa R, Schumm W, Steinmetz S, editors. *Sourcebook of family theories and*  
36 *methods: a contextual approach*. New York: Plenum Press; 1993. p. 469-98.  
37 115. McCarron M, Gill M, Lawlor B, Beagly C. A pilot study of the reliability and validity of the  
38 Caregiver Activity Survey - Intellectual disability (CAS-ID). *Journal of Intellectual Disability Research*.  
39 2002;46(8):605-12.  
40 116. Bedard M, Molloy DW, Squire L, Dubois BA, Lever JA, O'Donnell M. The Zarit Burden  
41 Interview: a new short version and screening version. *The Gerontologist*. 2001;41(5):652-7.  
42 117. Alliance NRH. The litte book of rural health numbers: Author; 2015. Available from:  
43 <https://www.ruralhealth.org.au/book/little-book-rural-health-numbers>.  
44  
45  
46  
47  
48  
49  
50  
51  
52  
53  
54  
55  
56  
57  
58  
59  
60

1  
2  
3  
4  
5  
6  
7  
8  
9  
10  
11  
12  
13  
14  
15  
16  
17  
18  
19  
20  
21  
22  
23  
24  
25  
26  
27  
28  
29  
30  
31  
32  
33  
34  
35  
36  
37  
38  
39  
40  
41  
42  
43  
44  
45  
46  
47  
48  
49  
50  
51  
52  
53  
54  
55  
56  
57  
58  
59  
60

**Figure Caption Sheet**

*Figure 1.* Satisfaction responses upon completion combined by survey type (n=482)

For peer review only

Table 1

*The ALSAA Inclusive Research Protocol*

| <b>Step</b>                                            | <b>Description of step and considerations</b>                                                                                                                                                                                                                                                                                                                                                                                                                                                                                                                                                                                                                                                                                                                                           |
|--------------------------------------------------------|-----------------------------------------------------------------------------------------------------------------------------------------------------------------------------------------------------------------------------------------------------------------------------------------------------------------------------------------------------------------------------------------------------------------------------------------------------------------------------------------------------------------------------------------------------------------------------------------------------------------------------------------------------------------------------------------------------------------------------------------------------------------------------------------|
| Step 1: Recruitment of advisors / peer-researchers     | Ensure recruitment is inclusive of all potential autistic individuals including adults with intellectual disability, consider using multiple channels of recruitment (e.g., Autism associations, self-advocacy networks, carer networks, adult networks, local radio, social media and word of mouth). In Australia, seek support from the Autism CRC Research Academy*.                                                                                                                                                                                                                                                                                                                                                                                                                |
| Step 2: Building rapport                               | If an established relationship does not already exist between the autistic individual and researcher, the researcher should offer to meet the individual (either face-to-face, over video conference or phone call). Be mindful that some autistic individuals may prefer to communicate via text or email and not to meet in person and should not be required to.                                                                                                                                                                                                                                                                                                                                                                                                                     |
| Step 3: Clarify what will be expected from the advisor | Outline tasks autistic advisors or peer researchers will be asked to complete. Specify the frequency and timing of when they are likely to be contacted. For specific tasks clearly provide step-by-step instructions, flexible lead-time, timeframes for feedback, area of investigation, and broad aim of the study. Make information available in Easy English or plain language as appropriate. Specify the type and nature of advice sought. Clearly describe how and where their input will be used and why their input is being sought.                                                                                                                                                                                                                                          |
| Step 4: Ethics, confidentiality and acknowledgement    | Describe ethics of the project and expected confidentiality. As required, specify on individual documents that the document is confidential and not to be distributed without discussion with the researcher. Can the autistic individual opt out if they would like? Outline what will happen if they choose to withdraw, e.g., this will not affect their relationship with the research team, university or any other associated organisations. It is a voluntary process. Negotiate and make explicit how the autistic advisor or peer-researcher will be acknowledged. Consider how the autistic individual may be recognised in a manuscript or research output. This may include as a co-author, in the acknowledgements section, and/or in discussing methodology and findings. |
| Step 5: Identify preferred communication style         | Ask the autistic individual their preferred communication style for providing feedback (e.g., face-to-face, phone call, email, video, or a variety of techniques). Also, in what medium they would like to receive the results/findings e.g., academic writing style, easy English writing style, mostly graphs/pictures, mostly dot points, described in person, video, PowerPoint presentation, etc. Although not all mediums may be practical, it is important to identify the autistic advisor's preferred style and then work together to identify a medium of communication which will be understood and accessible by both the autistic advisor and the researcher.                                                                                                              |
| Step 6: The sensory environment                        | The researcher must provide an 'autism-friendly' environment on any occasion where the autistic advisor and the researcher may be meeting in person, see p. 12-15 in the <i>Autism CRC Inclusive Research Practice Guides and Checklists for Autism Research</i> <sup>56</sup> regarding creating autism-friendly environments.                                                                                                                                                                                                                                                                                                                                                                                                                                                         |
| Step 7: Involvement in                                 | Autistic advisors input is sought in regard to questionnaire design and interpretation of results. The researcher will need to present questionnaire                                                                                                                                                                                                                                                                                                                                                                                                                                                                                                                                                                                                                                    |



|                                                                                     |                                            |                                                                                                                                                                                                                                                                                                                                                                                                                                                                                                                                                                                                                                                                                                                                                                                                                                                                              |
|-------------------------------------------------------------------------------------|--------------------------------------------|------------------------------------------------------------------------------------------------------------------------------------------------------------------------------------------------------------------------------------------------------------------------------------------------------------------------------------------------------------------------------------------------------------------------------------------------------------------------------------------------------------------------------------------------------------------------------------------------------------------------------------------------------------------------------------------------------------------------------------------------------------------------------------------------------------------------------------------------------------------------------|
| 1<br>2<br>3<br>4<br>5<br>6<br>7<br>8<br>9<br>10<br>11<br>12<br>13<br>14<br>15<br>16 | methodological design / results / findings | design questions or quantitative or qualitative results in an understandable format, developing design issue summaries or results summaries in the medium preferred by the autistic advisor or peer-researcher. This means the researcher may need to make a number of decisions around data analysis and interpretation.<br>Where possible, outline each of these decisions so the process is transparent and the autistic advisor can reflect on the decisions made by the researcher and whether these were appropriate in their view. Provide clear guidance on what advice is being sought, provide lead time, and the timeframe and process to follow for providing advice. How long should the advice be? In what format? Who will be reading it, who do they send the advice to? What are the researchers specifically looking for, what should the advice focus on? |
| 17<br>18<br>19<br>20<br>21                                                          | Step 8: Feedback                           | Once the researcher receives the advice from the autistic advisor, the researcher should provide a timeframe in which the autistic advisor will receive an update on what aspects of the advice was incorporated and the effect it had/didn't have on the methodology, findings, and/or interpretation.                                                                                                                                                                                                                                                                                                                                                                                                                                                                                                                                                                      |
| 22<br>23<br>24<br>25<br>26<br>27                                                    | Step 9: Final checks                       | Once the manuscript or research output has been further developed, the autistic advisor should receive a copy of the manuscript prior to submission. If the autistic advisor has limited experience with academic writing, the researcher should offer to describe/provide a lay summary of the overall article for the advisor.                                                                                                                                                                                                                                                                                                                                                                                                                                                                                                                                             |
| 28<br>29<br>30                                                                      | Step 10: Acknowledgement                   | Autistic advisor or peer-researcher to be acknowledged in the agreed upon manner (e.g., co-author, thanked in the acknowledgement section, acknowledged during a presentation etc.)                                                                                                                                                                                                                                                                                                                                                                                                                                                                                                                                                                                                                                                                                          |

\*The Autism CRC Research Academy (<https://www.autismcrc.com.au/research-academy>) provides training for peer researchers.

Table 2

*Measurements included in the ALSAA surveys*

| Measure / domain                                                                                | Self-report | Informant report | Carer |
|-------------------------------------------------------------------------------------------------|-------------|------------------|-------|
| Demographics and personal characteristics                                                       |             |                  |       |
| Basic demographics<br>(Age, Sex, Ethnicity, English speaking status)                            | ✓           | ✓                | ✓     |
| Other demographics<br>(Education, Occupation <sup>a</sup> , Family & living conditions, Income) | ✓           | ✓                | ✓     |
| Autism Characteristics                                                                          |             |                  |       |
| The Autism Quotient - Short <sup>b</sup> (AQ-Short) <sup>64</sup>                               | ✓           | ✓                | ✓     |
| Repetitive Behaviours Questionnaire-2 Adult Version (RBQ-2A) <sup>60</sup>                      | ✓           | ✓                |       |
| The Glasgow Sensory Questionnaire <sup>92</sup>                                                 | ✓           | ✓                |       |
| The Intolerance of Uncertainty Scale-12 <sup>93</sup>                                           | ✓           |                  | ✓     |
| Health & Well-Being                                                                             |             |                  |       |
| Medical history                                                                                 | ✓           | ✓                | ✓     |
| Medication profile                                                                              | ✓           | ✓                |       |
| Smoking, alcohol and illicit drug use <sup>a</sup>                                              | ✓           | ✓                |       |
| The Patient Health Questionnaire-15 <sup>94</sup>                                               | ✓           |                  | ✓     |
| Medical Outcomes Study Short Form Health Survey-12 (SF-12) <sup>95</sup>                        | ✓           | ✓                | ✓     |
| The Composite Autonomic Symptom Score - 31 (COMPASS 31) <sup>96</sup>                           | ✓           |                  |       |
| Pittsburgh Sleep Quality Index <sup>97</sup>                                                    | ✓           |                  |       |
| Flinders Fatigue Scale <sup>98</sup>                                                            | ✓           |                  |       |
| Mental & Emotional Health                                                                       |             |                  |       |
| DSM-5 Dimensional Anxiety Scales: Generalized Anxiety Disorder-Adult (DSM5 GAD-A) <sup>99</sup> | ✓           |                  | ✓     |
| The Patient Health Questionnaire-9 (PHQ-9) <sup>58</sup>                                        | ✓           |                  | ✓     |
| The Warwick Edinburgh Mental Well-being Scale <sup>100</sup>                                    | ✓           |                  |       |
| The New General Self-Efficacy Scale <sup>101</sup>                                              | ✓           |                  |       |
| The Emotion Regulation Questionnaire <sup>102</sup>                                             | ✓           |                  | ✓     |
| Developmental Behaviour Checklist-Adolescent/Adult version (DBC-A) Revised <sup>103</sup>       |             | ✓                |       |
| The Brief COPE <sup>104</sup>                                                                   | ✓           |                  | ✓     |
| Memory Complaint Questionnaire (MAC-Q) <sup>105</sup>                                           | ✓           |                  |       |
| Relationships & Social Networks                                                                 |             |                  |       |
| UCLA Loneliness Scale-8 (ULS-8) <sup>106</sup>                                                  | ✓           |                  |       |
| Supports and networks <sup>a</sup>                                                              | ✓           | ✓                |       |
| The Social Support Questionnaire (SSQ) <sup>107</sup>                                           | ✓           |                  | ✓     |
| Activities, Participation & Quality of Life                                                     |             |                  |       |

1  
2  
3  
4  
5  
6  
7  
8  
9  
10  
11  
12  
13  
14  
15  
16  
17  
18  
19  
20  
21  
22  
23  
24  
25  
26  
27  
28  
29  
30  
31  
32  
33  
34  
35  
36  
37  
38  
39  
40  
41  
42  
43  
44  
45  
46  
47  
48  
49  
50  
51  
52  
53  
54  
55  
56  
57  
58  
59  
60

|                                                                                      |   |   |   |
|--------------------------------------------------------------------------------------|---|---|---|
| WHOQOL-BREF <sup>108</sup>                                                           | ✓ |   | ✓ |
| Waisman Activities of Daily Living Scale (W-ADL) <sup>109</sup>                      | ✓ | ✓ |   |
| World Health Organisation Disability Assessment Schedule (WHO-DAS II) <sup>110</sup> | ✓ | ✓ | ✓ |
| Vocational Index for Adults with Autism <sup>111</sup>                               | ✓ | ✓ |   |
| Special abilities and interests <sup>c</sup>                                         | ✓ |   |   |
| Leisure activities participation                                                     | ✓ | ✓ |   |
| Leisure Satisfaction Scale (LSS) <sup>112</sup>                                      | ✓ |   |   |
| Driving and transport                                                                | ✓ | ✓ | ✓ |
| Service Usage                                                                        |   |   |   |
| Client Service Receipt Inventory (CSRI) <sup>113</sup>                               | ✓ | ✓ |   |
| Health service seeking behaviour                                                     | ✓ | ✓ |   |
| Early intervention service history                                                   | ✓ | ✓ |   |
| Justice system contact                                                               | ✓ | ✓ |   |
| Preventative health screening                                                        | ✓ | ✓ |   |
| Caring                                                                               |   |   |   |
| Positive Affect Index <sup>114</sup>                                                 |   |   | ✓ |
| Caregiver Activity Survey (CAS-ID) <sup>115</sup>                                    |   |   | ✓ |
| Zarit Burden Interview <sup>116</sup>                                                |   |   | ✓ |

<sup>a</sup> Based on questions from the National Health Survey of Mental Health and Wellbeing (Slade, Johnston, Oakley Browne, Andrews, & Whiteford, 2009). <sup>b</sup> A 28-item parent-carer report adaptation using items from the AQ-Adolescent (Baron-Cohen, Hoekstra, Knickmeyer, & Wheelwright, 2006) was used for the informant-report survey <sup>c</sup>Based on questions from the Interactive Autism Network (<https://iancommunity.org/>)

Table 3

*Recruitment statistics at close of Time 1 data gathering*

| Sample                              | Registered | Non-respondent | Ineligible (%) | Withdrawn (%) | Partial Completion (%) | Completed (%) |
|-------------------------------------|------------|----------------|----------------|---------------|------------------------|---------------|
| Self-report autistic adults         | 345        | 75 (22)        | 6 (2)          | 11 (3)        | 16 (5)                 | 237 (69)      |
| Self-report non-autistic adults     | 221        | 48 (22)        | 7 (3)          | 20 (9)        | 16 (7)                 | 130 (59)      |
| Carer                               | 185        | 48 (26)        | 22 (12)        | 13 (7)        | 2 (1)                  | 100 (54)      |
| Informant-report for autistic adult | 78         | 22 (28)        | 5 (6)          | 9 (11)        | 0 (0)                  | 42 (54)       |

Table 4

*Participant Characteristics*

| Characteristic                    | Autistic adults self-report formally diagnosed (N=221) | Autistic adults self-report no formal diagnosis (N=32) | Autistic adults informant-report (N=42) | Carers (N=102) | Non-autistic self-report (N=146) |
|-----------------------------------|--------------------------------------------------------|--------------------------------------------------------|-----------------------------------------|----------------|----------------------------------|
| Age mean (SD)                     | 41.8 (12.2)                                            | 44.2 (8.1)                                             | 32.5 (9.9)                              | 56.3 (11.2)    | 43.7 (13.5)                      |
| Gender (%)                        |                                                        |                                                        |                                         |                |                                  |
| Male                              | 86 (39)                                                | 14 (44)                                                | 34 (81)                                 | 16 (16)        | 29 (20)                          |
| Female                            | 124 (56)                                               | 17 (53)                                                | 8 (19)                                  | 85 (83)        | 117 (80)                         |
| Other                             | 11 (5)                                                 | 1 (3)                                                  | 0                                       | 1 (1)          | 0                                |
| <sup>a</sup> Ethnicity (%)        |                                                        |                                                        |                                         |                |                                  |
| Caucasian                         | 194 (88)                                               | 25 (78)                                                | 38 (90)                                 | 86 (89)        | 122 (85)                         |
| Other                             | 27 (12)                                                | 7 (22)                                                 | 4 (9)                                   | 11 (11)        | 22 (15)                          |
| Multilingual (%)                  | 26 (12)                                                | 5 (16)                                                 | 0                                       | 6 (6)          | 18 (12)                          |
| <sup>b</sup> SEIFA decile (SD)    | 6.18 (2.89)                                            | 5.74 (3.09)                                            | 6.58 (2.88)                             | 6.60 (2.78)    | 7.01 (2.60)                      |
| <sup>bc</sup> Rural / Remoteness  |                                                        |                                                        |                                         |                |                                  |
| Major City                        | 146 (71)                                               | 17 (55)                                                | 32 (84)                                 | 72 (73)        | 114 (83)                         |
| Inner Regional                    | 44 (21)                                                | 10 (32)                                                | 5 (13)                                  | 21 (21)        | 19 (14)                          |
| Outer Regional                    | 12 (6)                                                 | 4 (13)                                                 | 1 (3)                                   | 5 (5)          | 5 (4)                            |
| Remote / Very Remote              | 4 (2)                                                  | 0                                                      | 0                                       | 0              | 0                                |
| <sup>d</sup> Living situation (%) |                                                        |                                                        |                                         |                |                                  |
| Living alone                      | 58 (26)                                                | 9 (28)                                                 | 3 (7)                                   | 14 (14)        | 26 (18)                          |
| Living as couple                  | 95 (43)                                                | 18 (56)                                                | 4 (9)                                   | 74 (75)        | 105 (72)                         |
| Living with parents               | 31 (14)                                                | 0                                                      | 24 (57)                                 | 0              | 5 (3)                            |
| Living with other relatives       | 3 (1)                                                  | 0                                                      | 1 (2)                                   | 6 (6)          | 3 (2)                            |
| Living with others                | 20 (9)                                                 | 5 (16)                                                 | 8 (19)                                  | 4 (4)          | 5 (3)                            |
| Other                             | 14 (6)                                                 | 0                                                      | 2 (5)                                   | 1 (1)          | 2 (1)                            |
| <sup>e</sup> Marital Status (%)   |                                                        |                                                        |                                         |                |                                  |
| Single                            | 73 (33)                                                | 7 (22)                                                 | 36 (86)                                 | 4 (4)          | 22 (15)                          |
| Married                           | 66 (30)                                                | 12 (37)                                                | 4 (9)                                   | 65 (66)        | 90 (62)                          |
| De facto                          | 17 (8)                                                 | 3 (9)                                                  | 0                                       | 8 (8)          | 14 (9)                           |
| Never married                     | 8 (4)                                                  | 3 (9)                                                  | 2 (5)                                   | 2 (2)          | 3 (2)                            |
| Widowed                           | 1 (0)                                                  | 0                                                      | 0                                       | 3 (3)          | 2 (1)                            |
| Divorced now single               | 21 (9)                                                 | 3 (9)                                                  | 0                                       | 8 (8)          | 9 (6)                            |
| Divorced now remarried / de facto | 12 (5)                                                 | 2 (6)                                                  | 0                                       | 2 (2)          | 2 (1)                            |
| Separated                         | 7 (3)                                                  | 1 (3)                                                  | 0                                       | 2 (2)          | 1 (1)                            |
| Other                             | 16 (7)                                                 | 1 (3)                                                  | 0                                       | 4 (4)          | 3 (2)                            |
| Educational Status (%)            |                                                        |                                                        |                                         |                |                                  |

|                              |                           |                         |                         |                         |                           |
|------------------------------|---------------------------|-------------------------|-------------------------|-------------------------|---------------------------|
| Completed high school        | 163 (76)<br><i>n</i> =215 | 20 (64)<br><i>n</i> =31 | 21 (51)<br><i>n</i> =41 | 86 (88)<br><i>n</i> =98 | 120 (86)<br><i>n</i> =139 |
| Vocational education         | 61 (35)<br><i>n</i> =174  | 16 (57)<br><i>n</i> =28 | 4 (11)<br><i>n</i> =35  | 17 (17)<br><i>n</i> =98 | 20 (16)<br><i>n</i> =127  |
| University education         | 113 (65)<br><i>n</i> =174 | 12 (43)<br><i>n</i> =28 | 1 (3)<br><i>n</i> =35   | 59 (60)<br><i>n</i> =98 | 107 (84)<br><i>n</i> =127 |
| <sup>f</sup> Employment (%)  |                           |                         |                         |                         |                           |
| Open employment              | 116 (57)                  | 20 (69)                 | 6 (15)                  | 59 (60)                 | 104 (76)                  |
| Student / other day activity | 38 (19)                   | 3 (10)                  | 24 (60)                 | 3 (3)                   | 17 (12)                   |
| Retired, no volunteering     | 8 (4)                     | 2 (7)                   | 2 (5)                   | 19 (19)                 | 6 (4)                     |
| Homecare                     | 17 (8)                    | 3 (10)                  | 0                       | 9 (9)                   | 9 (6)                     |
| No activity                  | 22 (11)                   | 1 (3)                   | 8 (20)                  | 9 (9)                   | 1 (1)                     |

<sup>a</sup> Ethnicity: Carers, *n*=97; Non-autistic (self-report), *n*=144

<sup>b</sup> Autistic adults (diagnosis, self-report), *n*=209; Autistic adults (no diagnosis, self-report), *n*=31; Autistic adults (informant report), *n*=38; Carers, *n*=99; Non-autistic (self-report), *n*=138

<sup>c</sup> Australian population is 70% Major city, 18% Inner regional, 9% Outer regional, 1% Remote, 1% Very remote in the 2011 Census<sup>117</sup>

<sup>d</sup> Carers' Living situation: *n*=99

<sup>e</sup> Carers' Marital status: *n*=98

<sup>f</sup> Employment: Autistic adults (diagnosis, self-report), *n*=201; Autistic adults (no diagnosis, self-report), *n*=29; Autistic adults (informant report), *n*=40; Carers, *n*=99; Non-autistic (self-report), *n*=137

Table 5

*Diagnostic Characteristics*

| Characteristic                              | Autistic adults self-report formally diagnosed (N=221) | Autistic adults self-report no formal diagnosis (N=32) | Autistic adults informant-report (N=42) | Carers (N=102)                   | Non-autistic self-report (N=146) |
|---------------------------------------------|--------------------------------------------------------|--------------------------------------------------------|-----------------------------------------|----------------------------------|----------------------------------|
| AQ score mean (SD)                          | 87.6 (10.3)<br>n=210                                   | 83.7 (8.8)                                             | 84.2 (9.5)<br>n=36                      | 57.3 (13.8)<br>n=60 <sup>a</sup> | 55.1 (11.9)<br>n=137             |
| Above AQ Cutoff (%)                         | 203 (97)                                               | 31 (97)                                                | 35 (97)                                 | 18 (30)                          | 30 (22)                          |
| <sup>b</sup> Autism Diagnosis               |                                                        |                                                        |                                         |                                  |                                  |
| Autism spectrum disorder / condition        | 49 (22)                                                | -                                                      | 17 (40)                                 | -                                | -                                |
| Asperger's syndrome                         | 130 (59)                                               | -                                                      | 11 (26)                                 | -                                | -                                |
| Autistic disorder                           | 1 (0)                                                  | -                                                      | 6 (14)                                  | -                                | -                                |
| 'High-functioning' autism                   | 32 (14)                                                | -                                                      | 3 (7)                                   | -                                | -                                |
| PDD-NOS                                     | 1 (0)                                                  | -                                                      | 1 (2)                                   | -                                | -                                |
| Other                                       | 6 (3)                                                  | -                                                      | 2 (5)                                   | -                                | -                                |
| No formal diagnosis                         | -                                                      | 32 (100)                                               | 1 (2)                                   | -                                | -                                |
| Age at Diagnosis Mean (SD)                  | 35.3 (15.1)<br>n=217                                   | -                                                      | 10.01 (10.8)<br>n=38                    | -                                | -                                |
| Years since Diagnosis Mean (SD)             | 6.9 (8.3)<br>n=217                                     | -                                                      | 21.9 (9.8)<br>n=38                      | -                                | -                                |
| Intellectual Disability (%)                 | 10 (4)                                                 | 1 (3)                                                  | 33 (78)                                 | 1 (1)                            | 1 (1)                            |
| Other Developmental Disability (%)          | 6 (3)                                                  | 2 (6)                                                  | 9 (21)                                  | 0                                | 1 (1)                            |
| <sup>c</sup> Other Psychiatric Diagnosis(%) |                                                        |                                                        |                                         |                                  |                                  |
| Currently                                   | 148 (69)<br>n=213                                      | 13 (42)<br>n=31                                        | 22 (52)                                 | 38 (39)<br>n=100                 | 29 (21)<br>n=140                 |
| At any time                                 | 191 (89)<br>n=213                                      | 28 (90)<br>n=31                                        | 31 (74)                                 | 68 (68)<br>n=100                 | 67 (48)<br>n=140                 |
| Depression (PHQ-9) above cut-off (%)        | 103 (52)<br>n=199                                      | 15 (52)<br>n=29                                        | -                                       | 28 (29)<br>n=97                  | 15 (12)<br>n=126                 |
| Anxiety (DSM5 GAD-A) above cut-off (%)      | 115 (56)<br>n=206                                      | 14 (47)<br>n=32                                        | -                                       | 27 (27)<br>n=99                  | 14 (11)<br>n=130                 |

<sup>a</sup> Carers were asked to complete the AQ scale only if they were a biological relative of the adult with autism

1  
2  
3 <sup>b</sup> Autism diagnosis: Autistic adults (self-report, diagnosed),  $n=220$

4 <sup>c</sup> Recording of a psychiatric diagnosis apart from autism spectrum conditions or intellectual  
5 disability  
6  
7  
8  
9  
10  
11  
12  
13  
14  
15  
16  
17  
18  
19  
20  
21  
22  
23  
24  
25  
26  
27  
28  
29  
30  
31  
32  
33  
34  
35  
36  
37  
38  
39  
40  
41  
42  
43  
44  
45  
46  
47  
48  
49  
50  
51  
52  
53  
54  
55  
56  
57  
58  
59  
60

For peer review only



Table 6

*Carer Characteristics (N=102)*

| Characteristic                                              | Frequency / Mean          |
|-------------------------------------------------------------|---------------------------|
| Relationship to autistic person (%)                         |                           |
| Mother                                                      | 42 (43, <i>n</i> =98)     |
| Father                                                      | 10 (10, <i>n</i> =98)     |
| Partner/spouse                                              | 23 (23, <i>n</i> =98)     |
| Sibling                                                     | 2 (2, <i>n</i> =98)       |
| Child                                                       | 1 (1, <i>n</i> =98)       |
| Carer – unspecified                                         | 17 (17, <i>n</i> =98)     |
| Other                                                       | 3 (3, <i>n</i> =98)       |
| Age of autistic adult cared for mean ( <i>SD</i> )          | 37.5 (13.2)               |
| Hours spent per week with autistic adult mean ( <i>SD</i> ) | 63.4 (57.8, <i>n</i> =92) |

1  
2  
3  
4  
5  
6  
7  
8  
9  
10  
11  
12  
13  
14  
15  
16  
17  
18  
19  
20  
21  
22  
23  
24  
25  
26  
27  
28  
29  
30  
31  
32  
33  
34  
35  
36  
37  
38  
39  
40  
41  
42  
43  
44  
45  
46  
47  
48  
49  
50  
51  
52  
53  
54  
55  
56  
57  
58  
59  
60

For peer review only

1  
2  
3  
4  
5  
6  
7  
8  
9  
10  
11  
12  
13  
14  
15  
16  
17  
18  
19  
20  
21  
22  
23  
24  
25  
26  
27  
28  
29  
30  
31  
32  
33  
34  
35  
36  
37  
38  
39  
40  
41  
42  
43  
44  
45  
46  
47  
48  
49  
50  
51  
52  
53  
54  
55  
56  
57  
58  
59  
60

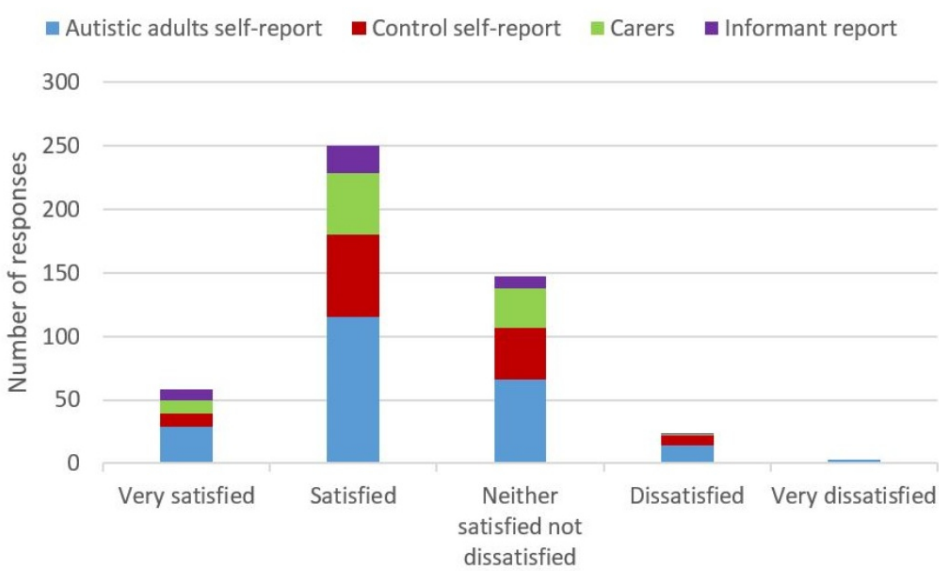

Figure 1. Satisfaction responses upon completion combined by survey type (n=482)

89x53mm (300 x 300 DPI)

# BMJ Open

## Cohort profile: The Australian Longitudinal Study of Adults with Autism (ALSAA)

|                                 |                                                                                                                                                                                                                                                                                                                                                                                                                                                                                                                                                                                                                                                                                                                                                                                                                                                                                                                                                                                                                                                                                                                                                                                                                                                                                                                                                                                                                                                                                                                                                                                                                                                                                                                |
|---------------------------------|----------------------------------------------------------------------------------------------------------------------------------------------------------------------------------------------------------------------------------------------------------------------------------------------------------------------------------------------------------------------------------------------------------------------------------------------------------------------------------------------------------------------------------------------------------------------------------------------------------------------------------------------------------------------------------------------------------------------------------------------------------------------------------------------------------------------------------------------------------------------------------------------------------------------------------------------------------------------------------------------------------------------------------------------------------------------------------------------------------------------------------------------------------------------------------------------------------------------------------------------------------------------------------------------------------------------------------------------------------------------------------------------------------------------------------------------------------------------------------------------------------------------------------------------------------------------------------------------------------------------------------------------------------------------------------------------------------------|
| Journal:                        | <i>BMJ Open</i>                                                                                                                                                                                                                                                                                                                                                                                                                                                                                                                                                                                                                                                                                                                                                                                                                                                                                                                                                                                                                                                                                                                                                                                                                                                                                                                                                                                                                                                                                                                                                                                                                                                                                                |
| Manuscript ID                   | bmjopen-2019-030798.R3                                                                                                                                                                                                                                                                                                                                                                                                                                                                                                                                                                                                                                                                                                                                                                                                                                                                                                                                                                                                                                                                                                                                                                                                                                                                                                                                                                                                                                                                                                                                                                                                                                                                                         |
| Article Type:                   | Cohort profile                                                                                                                                                                                                                                                                                                                                                                                                                                                                                                                                                                                                                                                                                                                                                                                                                                                                                                                                                                                                                                                                                                                                                                                                                                                                                                                                                                                                                                                                                                                                                                                                                                                                                                 |
| Date Submitted by the Author:   | 30-Oct-2019                                                                                                                                                                                                                                                                                                                                                                                                                                                                                                                                                                                                                                                                                                                                                                                                                                                                                                                                                                                                                                                                                                                                                                                                                                                                                                                                                                                                                                                                                                                                                                                                                                                                                                    |
| Complete List of Authors:       | <p>Arnold, Samuel; UNSW, Department of Developmental Disability Neuropsychiatry (3DN); Autism CRC</p> <p>Foley, Kitty-Rose; Southern Cross University - Gold Coast Campus, School of Health and Human Sciences; Autism CRC</p> <p>Hwang, Ye In; UNSW, Department of Developmental Disability Neuropsychiatry (3DN); Autism CRC</p> <p>Richdale, Amanda; La Trobe University, Olga Tennison Autism Research Centre, School of Psychology and Public Health; Autism CRC</p> <p>Uljarevic, Mirko ; Stanford University, Stanford Autism Center, Division of Child and Adolescent Psychiatry, Department of Psychiatry and Behavioral Sciences, School of Medicine; La Trobe University, Olga Tennison Autism Research Centre, School of Psychology and Public Health</p> <p>Lawson, Lauren; La Trobe University, Olga Tennison Autism Research Centre, School of Psychology and Public Health; Autism CRC</p> <p>Cai, Ru; La Trobe University, Olga Tennison Autism Research Centre, School of Psychology and Public Health; Autism CRC</p> <p>Falkmer, Torbjorn; Curtin University, School of Occupational Therapy, Social Work and Speech Pathology; Autism CRC</p> <p>Falkmer, Marita; Curtin University, School of Occupational Therapy, Social Work and Speech Pathology; Autism CRC</p> <p>Lennox, Nick; University of Queensland, Australia, Queensland Centre for Intellectual and Developmental Disability, Mater Research Institute - UQ; Autism CRC</p> <p>Urbanowicz, Anna; RMIT University, Health, Society &amp; Medicine Research Program, Social and Global Studies Centre; Autism CRC</p> <p>Trollor, Julian; UNSW, Department of Developmental Disability Neuropsychiatry (3DN); Autism CRC</p> |
| <b>Primary Subject Heading</b>: | Mental health                                                                                                                                                                                                                                                                                                                                                                                                                                                                                                                                                                                                                                                                                                                                                                                                                                                                                                                                                                                                                                                                                                                                                                                                                                                                                                                                                                                                                                                                                                                                                                                                                                                                                                  |
| Secondary Subject Heading:      | Diagnostics                                                                                                                                                                                                                                                                                                                                                                                                                                                                                                                                                                                                                                                                                                                                                                                                                                                                                                                                                                                                                                                                                                                                                                                                                                                                                                                                                                                                                                                                                                                                                                                                                                                                                                    |
| Keywords:                       | Autism, Longitudinal, Adult                                                                                                                                                                                                                                                                                                                                                                                                                                                                                                                                                                                                                                                                                                                                                                                                                                                                                                                                                                                                                                                                                                                                                                                                                                                                                                                                                                                                                                                                                                                                                                                                                                                                                    |
|                                 |                                                                                                                                                                                                                                                                                                                                                                                                                                                                                                                                                                                                                                                                                                                                                                                                                                                                                                                                                                                                                                                                                                                                                                                                                                                                                                                                                                                                                                                                                                                                                                                                                                                                                                                |

1  
2  
3  
4  
5  
6  
7  
8  
9  
10  
11  
12  
13  
14  
15  
16  
17  
18  
19  
20  
21  
22  
23  
24  
25  
26  
27  
28  
29  
30  
31  
32  
33  
34  
35  
36  
37  
38  
39  
40  
41  
42  
43  
44  
45  
46  
47  
48  
49  
50  
51  
52  
53  
54  
55  
56  
57  
58  
59  
60



## Title

Cohort profile: The Australian Longitudinal Study of Adults with Autism (ALSAA)

## Author Names and Affiliations

Samuel R. C. Arnold<sup>\*a,b</sup> <samuel.arnold@unsw.edu.au>

Kitty-Rose Foley<sup>\*b,c</sup> <Kitty-Rose.Foley@scu.edu.au>

Ye In (Jane) Hwang<sup>a,b</sup> <jane.hwang@unsw.edu.au>

Amanda L. Richdale<sup>b,d</sup> <A.Richdale@latrobe.edu.au>

Mirko Uljarevic<sup>e,d,b</sup> <mirkoulj@stanford.edu>

Lauren P. Lawson<sup>b,d</sup> <L.Lawson@latrobe.edu.au>

Ru Ying Cai<sup>b,d</sup> <R.Cai@latrobe.edu.au>

Torbjorn Falkmer<sup>b,f</sup> <T.Falkmer@curtin.edu.au>

Marita Falkmer<sup>b,f,g</sup> <Marita.Falkmer@curtin.edu.au>

Nick Lennox<sup>b,h</sup> <n.lennox@uq.edu.au>

Anna Urbanowicz<sup>b,h,i</sup> <a.urbanowicz@rmit.edu.au>

Julian N. Trollor<sup>+a,b</sup> <J.Trollor@unsw.edu.au>

## Affiliations

- a- Department of Developmental Disability Neuropsychiatry (3DN), UNSW Sydney, New South Wales, Australia
- b- Cooperative Research Centre for Living with Autism (Autism CRC), Brisbane, Queensland, Australia
- c- School of Health and Human Sciences, Southern Cross University, Gold Coast, Bilinga, Queensland, Australia
- d- Olga Tennison Autism Research Centre, School of Psychology and Public Health, La Trobe University, Bundoora, Victoria, Australia
- e- Stanford Autism Center, Division of Child and Adolescent Psychiatry, Department of Psychiatry and Behavioral Sciences, School of Medicine, Stanford University.

- 1  
2  
3 f- School of Occupational Therapy, Social Work and Speech Pathology, Curtin  
4 University, Perth, Western Australia, Australia  
5  
6 g- School of Education and Communication, CHILD Programme, Institution of  
7 Disability Research, Jonkoping University, Jonkoping, Sweden  
8  
9  
10 h- Queensland Centre for Intellectual and Developmental Disability, Mater Research  
11 Institute - UQ, The University of Queensland, South Brisbane, Queensland, Australia  
12  
13 i- Health, Society & Medicine Research Program, Social and Global Studies Centre,  
14 RMIT University, Melbourne, Victoria, Australia  
15  
16

17 \*Joint first author

18  
19 +Corresponding author  
20  
21  
22  
23  
24  
25

26 Correspondence concerning this article should be addressed to Prof. Julian Trollor,  
27 Department of Developmental Disability Neuropsychiatry (3DN), 34 Botany St, UNSW  
28 Sydney, 2052, New South Wales, Australia. Telephone: +61-2-9931-9160. Email:  
29 [j.trollor@unsw.edu.au](mailto:j.trollor@unsw.edu.au)  
30  
31  
32  
33  
34  
35  
36  
37  
38  
39  
40  
41  
42  
43  
44  
45  
46  
47  
48  
49  
50  
51  
52  
53  
54  
55  
56  
57  
58  
59  
60

## Abstract (300 Words)

### *Purpose*

There is a significant knowledge gap regarding the lives of adults on the autism spectrum. Some literature suggests significant health and mental health inequalities for autistic adults, yet there is a lack of comprehensive longitudinal studies exploring risk factors. Further, most research does not include the perspective of autistic adults in its conduct or design. Here we describe the baseline characteristics and inclusive research approach of a nationwide longitudinal study.

### *Participants*

The Autism CRC's ALSAA is a questionnaire-based longitudinal study of autistic adults (25+ years old) with follow-up at 2-year intervals. Autistic advisors were involved in each stage of research apart from data analysis. Three questionnaires were developed: self-report, informant report (i.e. proxy report), and carers (i.e. carer experiences and characteristics).

### *Findings to date*

An inclusive research protocol was developed and agreed with autistic advisors. Baseline data were collected from 295 autistic adults ( $M=41.8$  years,  $SD=12.0$ ) including 42 informant responses, 146 comparison participants, and 102 carers. The majority of autistic participants (90%) had been diagnosed in adulthood ( $M=35.3$  years,  $SD=15.1$ ). When compared to controls, autistic adults scored higher on self-report measures of current depression and anxiety. Participant comments informed on-going data gathering. Participants commented on questionnaire length, difficulty with literal interpretation of forced response items, and expressed gratitude for research in this area.

### *Future plans*



1  
2  
3 A large comprehensive dataset relating to autistic adults and their carers has been gathered,  
4  
5 creating a good platform for longitudinal follow-up repeat surveys and collaborative research.  
6  
7 Several outputs are in development, with focus on health service barriers and usage,  
8  
9 caregivers, impact of diagnosis in adulthood, further scale validations, longitudinal analyses  
10  
11 of loneliness, suicidal ideation, mental illness risk factors and other areas. Baseline data  
12  
13 confirms poorer mental health of autistic adults. The ALSAA demonstrates a working  
14  
15 approach to inclusive research.  
16  
17  
18  
19  
20  
21  
22  
23  
24  
25  
26  
27  
28  
29  
30  
31  
32  
33  
34  
35  
36  
37  
38  
39  
40  
41  
42  
43  
44  
45  
46  
47  
48  
49  
50  
51  
52  
53  
54  
55  
56  
57  
58  
59  
60

### Strengths and limitations of this study

- Autism related research efforts and funding has typically focused on the period from infancy to mid childhood, this research focuses on autistic adults and their carers.
- The ALSAA uses an inclusive research approach to gather a comprehensive range of measures addressing identified research priorities.
- A large proportion of the ALSAA sample at Time 1 were female, including 50% ( $n=149$ ) of autistic and 80% ( $n=117$ ) of non-autistic participants.
- Participants self-report their autism diagnosis, and a subsample ( $n=32$ ) are not yet formally diagnosed.
- The ALSAA is a unique resource for exploring multiple research questions regarding the lives of Australian autistic adults.

## Introduction

Although autism is a lifelong condition, most autism related research efforts and funding has focused on the period from infancy to mid childhood<sup>1</sup>. The best available evidence suggests an adult population prevalence of at least 1.1%<sup>2</sup>. It is likely that autism is under-recognized or under-diagnosed in adults<sup>3,4</sup>, particularly in women without intellectual disability<sup>2,5</sup>.

Although an emerging body of research explores outcomes and support needs of autistic individuals beyond childhood and adolescence, studies including autistic adults remain frequently focused on younger adults<sup>6-8</sup>. This is reflected in recent commentary from an autistic researcher; “We know virtually nothing about what happens to us, autistic people, physically, cognitively, emotionally and socially as we pass through middle and older age”<sup>9</sup>(p515).

The growing body of evidence suggests higher rates of physical and mental health conditions, increased mortality and higher rates of intellectual disability than in the general population<sup>10</sup>. Autistic adults have higher prevalence of chronic medical conditions, including conditions such as stroke, vision and hearing impairments, and Parkinson’s disease<sup>11-14</sup>. These outcomes are experienced by many autistic adults regardless of intellectual functioning<sup>7</sup>. It has been reported that between 25%-84% of autistic adults have a diagnosed mental health condition, with depression and anxiety the most commonly reported conditions<sup>15-19</sup>. Autistic adults have higher rates of suicide<sup>16,20</sup>, increased mortality and reduced life expectancy<sup>21</sup>. Despite widespread acknowledgement of the comorbidity between autism and intellectual disability, prevalence estimates of intellectual disability in autism and vice versa have been inconsistent<sup>22</sup>. Earlier studies report that between 40 to 70% of those with autism also have an intellectual disability<sup>23-25</sup> though a more recent study reports fewer adults on the autism spectrum as having intellectual disability<sup>2</sup> and intelligence tests may underestimate performance of autistic individuals<sup>26</sup>.

1  
2  
3 Studies investigating outcomes related to daily activities and participation are also scarce<sup>27</sup>.  
4  
5 Available studies report low employment rates<sup>28</sup>, low community inclusion and limited social  
6  
7 relationships for autistic adults<sup>29-33</sup>. A few studies have suggested that factors such as low  
8  
9 childhood IQ, autism severity, psychopathology, social and language development, and  
10  
11 access to services and intervention programs may be determinates of such outcomes <sup>29, 34</sup>;  
12  
13 however, much remains to be understood about the sources of variability in these outcomes.  
14  
15  
16 In general, much of the research remains limited by cross-sectional designs, mixed groups  
17  
18 with and without intellectual disability, and a focus on adults aged under 40 <sup>7, 34-36</sup>.  
19  
20  
21 Longitudinal studies are crucial for exploring changing requirements over time and to inform  
22  
23 services how best to respond to the needs of autistic adults<sup>9, 37</sup>. Whilst most studies have  
24  
25 focused on one aspect of life or outcomes, such as physical or mental health comorbidities<sup>12,</sup>  
26  
27 <sup>15, 38</sup> or quality of life<sup>30, 39</sup>, very few comprehensive evaluations of health, wellbeing and  
28  
29 participation have been conducted<sup>34</sup>. Further, research funding does not match priorities  
30  
31 identified by autistic adults, which include research on public services, improving life skills  
32  
33 and the future for autistic adults<sup>40</sup>.  
34  
35  
36  
37  
38

39 The majority of existing autism research is also limited by a lack of inclusive research  
40  
41 practices. There is a small but growing body of research on inclusive practices and co-  
42  
43 production in disability research with increasing examples in the autism field<sup>41-43</sup>. In  
44  
45 principle, inclusive research must “address issues that really matter” to people with disability,  
46  
47 “must access and represent their views and experiences” and people “need to be treated with  
48  
49 respect by the research community”<sup>44(p16)</sup>. Inclusive research encompasses a variety of  
50  
51 approaches, from including the individuals with the disability as advisors or consultants, to  
52  
53 working alongside academic researchers, or initiating or conducting the project as researchers  
54  
55 themselves<sup>45</sup>. Due to a history of mistrust between researchers and autism self-advocacy  
56  
57 groups, inclusive methods are especially important in research involving adults on the  
58  
59  
60

1  
2  
3 spectrum<sup>46</sup>. Inclusive approaches ensure scientific findings are meaningful to the autism  
4  
5 community and sensitive to the lived experiences of individuals on the spectrum<sup>47, 48</sup>.  
6  
7

8  
9 The Cooperative Research Centre for Living with Autism (Autism CRC) Australian  
10  
11 Longitudinal Study of Adults with Autism (ALSAA) is Australia's first national longitudinal  
12  
13 study involving autistic adults aged 25 years and older. The ALSAA will contribute needed  
14  
15 longitudinal data across a range of health, functioning and participation domains. Data  
16  
17 gathered aligns with the research gaps identified above, and the priorities identified by  
18  
19 autistic adults<sup>49</sup>. In comparison to current international longitudinal studies of autistic  
20  
21 adults<sup>50-52</sup> the ALSAA gathers a wider range of data points using standardised measures and  
22  
23 importantly included autistic adults in study design from the early stages of the project.  
24  
25 Further, the ALSAA gathers data from a community comparison group which is often lacking  
26  
27 in prior work. The ALSAA will contribute to the validation of several standardised measures  
28  
29 for this population. Importantly, the ALSAA gathers data specific to the unique context and  
30  
31 service systems within Australia, pertinent given the recent introduction of the National  
32  
33 Disability Insurance Scheme (NDIS) and the considerable differences in approaches to  
34  
35 healthcare and disability across countries. The ALSAA primarily aims to identify and  
36  
37 comprehensively describe the profiles of Australian autistic adults and to compare them to a  
38  
39 control group. Longitudinal data will further allow the determination of predictors versus  
40  
41 correlates across a range of outcomes. The aims of this paper are to describe the  
42  
43 methodological processes and the inclusive protocol adopted in the ALSAA, as well as to  
44  
45 present participant characteristics and feedback from the baseline data collection. Exploratory  
46  
47 baseline comparisons aim to identify covariates or confounders for consideration in future  
48  
49 studies.  
50  
51  
52  
53  
54  
55  
56  
57

## 58 **Cohort Description**

59  
60

### *Design*

The ALSAA is a questionnaire-based, prospective, longitudinal cohort study with a planned 2-year follow-up and further follow-ups as resources allow. Initial design and development of the ALSAA occurred in collaboration with researchers and clinical health professionals across Australia, including close collaboration with the Autism CRC longitudinal Study of Australian School Leavers with Autism (SASLA)<sup>53</sup>. Brief consultation also occurred with international experts and researchers conducting similar longitudinal studies. Additionally, preliminary work on factors influencing the research participation of autistic adults<sup>54</sup> influenced the ALSAA design, including ensuring opportunities for participants to clarify questions, receive regular study newsletters, and space for participants to provide explanations regarding their responses.

### *Patient and Public Involvement*

*How was the development of the research question and outcome measures informed by patients' priorities, experience, and preferences?*

The ALSAA was developed in conjunction with SASLA, the SASLA team conducted a stakeholders' research forum in late 2014 and obtained written feedback from participants (autistic people, families and service providers) that helped inform both studies. The SASLA team also consulted with individuals on the spectrum, parents and autism support groups. The ALSAA was developed with input from a research advisory network, initially consisting of 6 autistic adults and 2 family members/carers of autistic adults who helped determine areas of investigation, and develop the surveys to ensure the questions were relevant, accessible and valid.

1  
2  
3 *How did you involve patients in the design of this study?*  
4  
5

6 The ALSAA Inclusive Research Protocol was developed from interactions between the  
7 researchers and advisors, and based on the principles of inclusive research<sup>55</sup>, the Autism CRC  
8 report *Inclusive Research Practice Guides and Checklists for Autism Research*<sup>56</sup> (e.g.  
9 Checklist 3: Practices that Support Inclusion of Individuals on the Autism Spectrum in  
10 Advisory and Reference Groups), and procedures similar to those employed by Nicolaidis  
11 and colleagues<sup>57</sup> (e.g. choosing topic areas, adapting data collection instruments, interpreting  
12 results) (see Table 1). In contrast to Nicolaidis and colleagues<sup>57</sup>, ALSAA employs an  
13 advisory approach as opposed to participatory approaches where final decision-making rests  
14 with the committee, and there has not been any group or in-person consultation sessions,  
15 which is a preference of some autistic advisors. Guidelines such as those developed by  
16 AASPIRE<sup>58</sup> were not available at the time of the study design.  
17  
18  
19  
20  
21  
22  
23  
24  
25  
26  
27  
28  
29  
30  
31

32 *Were patients involved in the recruitment to and conduct of the study?*  
33  
34

35 Since the commencement of the ALSAA, this inclusive research protocol has been reviewed  
36 by seven of the autistic advisors and one carer advisor and has guided the interactions  
37 between researchers and advisors in the development of baseline outputs and the 2-year  
38 follow-up design. Specifically, in the design stage of the ALSAA, members of the advisory  
39 network were asked to identify ambiguous or inappropriate language, formatting issues and  
40 measures which they thought may be interpreted inappropriately or differently due to poor  
41 clarity or wording. An expanded group of eleven advisors had greater input in designing the  
42 2-year follow-up, including the selection of focus topic areas. A list of topic areas was  
43 suggested to the advisors based on a review of time 1 participant feedback. Advisors  
44 reviewed the list and added more topics or specific research questions of interest. A few  
45 advisors expressed difficulty or did not complete a task of ranking the topics, hence the  
46  
47  
48  
49  
50  
51  
52  
53  
54  
55  
56  
57  
58  
59  
60

1  
2  
3 researchers were required to make the final shortlisting of new topics areas to be included in  
4 data gathering. In comparison to several other studies<sup>59</sup> autistic adults are involved in the  
5 majority of stages of the study apart from collecting data, they have been involved in review  
6 of some media related lay summaries but have not typically been involved in development of  
7 newsletter content. As per the protocol advisors are given forewarning, then one month to  
8 respond to most requests from the research team, with more response time as needed.  
9

10  
11  
12  
13  
14  
15  
16  
17  
18  
19  
20  
21  
22  
23  
24  
25  
26  
27  
28  
29  
30  
31  
32  
33  
34  
35  
36  
37  
38  
39  
40  
41  
42  
43  
44  
45  
46  
47  
48  
49  
50  
51  
52  
53  
54  
55  
56  
57  
58  
59  
60

Advisors have provided feedback on ongoing research outputs critiquing interpretations of findings suggested by the researchers. In Time 2 data gathering and analyses, compensation has been made available for advisors' time, upon request to the Autism CRC, which has become increasingly supportive of co-production approaches. Advisors are now offered an hourly rate for each time they are consulted, with most consultations limited to two hours, though several advisors still prefer to volunteer and do not request compensation on most occasions. Advisors to date have not been involved in data analysis, though several co-produced peer-research projects are currently underway. Advisors have also assisted in promoting recruitment materials particularly through social media.

#### *How will the results be disseminated to study participants?*

The ALSAA sends quarterly digital newsletters to all participants. Newsletters include lay summaries of any publications, conference presentations or other outputs developed using the ALSAA data. They also typically contain general interest highlight(s) relating to the autism or autistic community, recruitment calls for other autism research, as well as a team member profile of an ALSAA researcher or autistic advisor. Advisors frequently assist in furthering the promotion of the study and outputs via social media. Our recent study on loneliness<sup>60</sup>, included in the latest study newsletter, was a topic originally identified by advisors in time 1 data gathering, and demonstrates the inclusive approach used in the ALSAA. Advisors have



1  
2  
3 been approached to assist with autism related media enquiries and will continue to do so  
4  
5 when opportunities arise.  
6  
7  
8  
9

10  
11 **[Insert Table 1 here]**  
12  
13

### 14 *Participants*

15  
16  
17  
18 There are three participant groups in the ALSAA: autistic adults, non-autistic general  
19  
20 community comparison controls, and carers of autistic adults. Inclusion criteria required the  
21  
22 control and autistic participants to be aged 25 years or older, live in Australia and have  
23  
24 sufficient English literacy skills to complete the survey, determined during a screening phone  
25  
26 call or online expression of interest (EOI). If an autistic individual was unable or preferred  
27  
28 not to self-report, they were given the option to ask an informant to complete an informant  
29  
30 version of the survey on their behalf. People with intellectual disability could complete the  
31  
32 self-report survey with support or participate via an informant respondent.  
33  
34  
35

36  
37 Informant respondents and carers needed to be 18 years or older, have sufficient English  
38  
39 literacy skills, live in Australia and be able to report on the life of the autistic person. The  
40  
41 content of the informant survey is slightly different to the self-report survey (see Table 2) due  
42  
43 to some measures, such as the Patient Health Questionnaire-9 (PHQ-9)<sup>61</sup>, having no  
44  
45 informant version available. Carers, including family members and support people for the  
46  
47 ALSAA, were defined as people who provided unpaid care and support to either a family  
48  
49 member (including spouse) or friend who is on the autism spectrum. This is based on the  
50  
51 widely accepted definition proposed by Carers Australia  
52  
53 (<http://www.carersaustralia.com.au/about-carers/>).  
54  
55  
56  
57

### 58 *Survey*

59  
60

1  
2  
3 Three versions of the survey were developed: 1) self-report, for autistic adults and non-  
4  
5 autistic controls, 2) informant, for carers/support people to complete about the autistic person  
6  
7 who is unable to, or does not want to self-complete, and 3) carer survey for carers/support  
8  
9 people/family members to complete about their own health and wellbeing. Surveys could be  
10  
11 completed via a paper copy or online. The paper copy was also available in large print. The  
12  
13 surveys involved a comprehensive range of measures (see Table 2). In selecting measures,  
14  
15 preference was given to measures that had been previously used or had established validity  
16  
17 with people on the spectrum and to those deemed suitable by the autistic advisors. Most  
18  
19 measures have not been specifically validated for autistic adults, with notable recent  
20  
21 exceptions of the WHOQOL BREF<sup>51</sup>, SF-12<sup>62</sup> and the RBQ-2A<sup>63</sup>, while the PHQ-9<sup>64</sup> was  
22  
23 more recently validated using a combined ALSAA and SASLA data set.  
24  
25  
26  
27  
28

29 **[Insert Table 2 here]**  
30

31  
32 Each survey also contained closing feedback items, asking if any questions were confusing,  
33  
34 difficult, or upsetting, and any additional topics that should be included. It also asked how  
35  
36 long the survey took to complete (open-ended response), and an overall satisfaction with the  
37  
38 survey rated on a 5-point Likert scale. A final item asked for any further feedback.  
39  
40  
41

## 42 *Procedure*

### 43 *Piloting*

44  
45  
46 Four autistic adults piloted the self-report questionnaire and two caregivers piloted the carer  
47  
48 and the informant questionnaires. Volunteers received two copies, one copy to complete, with  
49  
50 data recorded where possible in the ALSAA dataset, and the other for their feedback.  
51  
52  
53

54  
55 Considerable changes to each version of the survey were undertaken in response to feedback  
56  
57 from the autistic advisors and volunteers, including removing the Communication Checklist –  
58  
59  
60

1  
2  
3 Adult<sup>65</sup>, formatting changes and changes to item wordings where the item did not belong to  
4  
5 an existing standardised tool.  
6  
7

### 8 *Recruitment and Follow-up*

9  
10  
11 A recruitment target of 160 autistic adults was set to allow for regression analyses using  
12  
13 multiple predictor variables. Power analyses, undertaken using power calculation software,  
14  
15 suggested this would be a sufficient sample size with power (1 -  $\beta$ ) set at .80 and  $\alpha = .05$  to  
16  
17 detect a Cohen's  $f^2$  effect size estimate of at least .1 using multiple regression models with 7  
18  
19 predictors. Participants were recruited via advertisements through autism-specific  
20  
21 organisations, disability organisations, autism self-advocacy groups, employment services,  
22  
23 universities, Technical and Further Education (TAFE) institutes, psychology and allied health  
24  
25 private practices, carer organisations, and online autism communities. In attempts to gather a  
26  
27 sample more closely matched to Australian population estimates<sup>66</sup>, additional recruitment  
28  
29 activities targeted adults on the spectrum with intellectual disability, and males without  
30  
31 autism. General community members, autistic adults and carers of autistic adults who were  
32  
33 willing to participate in the ALSAA contacted the research team based at The University of  
34  
35 New South Wales (UNSW Sydney) via telephone, email or through completing a short online  
36  
37 EOI. After eligibility screening, their details were added to the participant database and they  
38  
39 were mailed a paper copy or emailed a link to their survey depending on their preference.  
40  
41  
42  
43  
44  
45  
46

47 Due to a high number of responses and advice from autistic advisors, participants who self-  
48  
49 identified as being autistic, but did not have a formal diagnosis, representing the hidden  
50  
51 population and 'lost generation'<sup>3</sup> of autistic adults, were also recruited. Formally diagnosed  
52  
53 participants were asked to provide details of their diagnosis, year of diagnosis, and the  
54  
55 discipline and name of the practitioner(s) who diagnosed them. AQ-short cut-off scores (>65,  
56  
57 sensitivity .97, specificity .82)<sup>67</sup> also support diagnostic status. Given critiques of  
58  
59  
60

1  
2  
3 applicability and validity of the AQ-short<sup>68, 69</sup>, we plan to include the Ritvo Autism and  
4  
5 Asperger Diagnostic Scale-14 (RAADS-14)<sup>69</sup> in future data gathering. At the planned two-  
6  
7 year average Time 2 follow-up copies of participants' diagnostic reports will be requested,  
8  
9  
10 with a project undertaken to review and categorise the reports. From November 2017 through  
11  
12 2019 participants are being recontacted using contact details provided and considering their  
13  
14 communication preferences that were recorded.  
15

### 16 17 18 *Ethical Considerations*

19  
20  
21 Participants were supplied with the appropriate Participant Information Statement and  
22  
23 Consent Form (PISCF). For the online survey, participants were asked to confirm their  
24  
25 consent at commencement, marking checkboxes prior to proceeding. Consent was inferred  
26  
27 from participants who completed and returned paper copies of the survey, as outlined in their  
28  
29 PISCF. In the case where the autistic adult had an intellectual disability a checklist for  
30  
31 capacity to provide consent was used. This checklist was completed by the carer/next of kin;  
32  
33 it was adapted from a checklist developed for use in the Study of Ageing in Intellectual  
34  
35 Disability (SAGE)<sup>70</sup>. The checklist asks several question relating to the person's ability to  
36  
37 understand the study, benefits and risks, withdrawal and complaints, to determine if a person  
38  
39 responsible consent should be obtained additionally or separately. The study was approved by  
40  
41 the Human Research Ethics Committee at UNSW Sydney, Australia (No. HC15001).  
42  
43  
44  
45

### 46 47 *Data storage*

48  
49  
50 Online questionnaire data were entered directly by participants into Qualtrics Online Survey  
51  
52 Software (<https://www.qualtrics.com/>), whereas returned paper copy surveys were entered  
53  
54 into Qualtrics by a researcher or research assistant. Data from Qualtrics, re-identifiable by  
55  
56 participation code, were stored on password-protected UNSW Sydney servers. Recently,  
57  
58  
59  
60

1  
2  
3 ethics approval for establishment of a databank for the ALSAA data, to allow collaboration  
4  
5 with external researchers, has been obtained.  
6  
7

### 8 *Statistical analysis*

9  
10  
11 STATA Statistical Analysis Software 14<sup>71</sup> and IBM SPSS Statistics 22<sup>72</sup> were used for  
12  
13 cleaning, coding, and statistical analyses. For the current manuscript, STATA was used to  
14  
15 obtain descriptive statistics regarding recruitment, participant feedback, and participant  
16  
17 characteristics, with the level of significance <.05.. No correction was applied for multiple  
18  
19 statistical tests in this manuscript, as the purpose was to explore baseline differences in the  
20  
21 cohorts, and determine potential variables that may be useful covariates or possible  
22  
23 confounders in later hypothesis testing<sup>73</sup>. For describing this cohort profile, listwise deletion  
24  
25 was used for specific analyses when data were missing completely at random, after checking  
26  
27 for difference in demographics and AQ score for dropped participants where appropriate.  
28  
29 Subsample sizes are noted throughout. Data were checked for kurtosis and skew. Non-  
30  
31 parametric Spearman rank correlation was used to determine the correlation between time  
32  
33 taken to complete the self-report survey and level of satisfaction.  
34  
35  
36  
37  
38  
39

### 40 *Recruitment statistics*

41  
42  
43 Recruitment commenced in July 2015. At the close of Time 1 data gathering in November  
44  
45 2017, 345 autistic adults, 221 non-autistic adults, 185 carers, and 78 informants had  
46  
47 registered their interest in the study. Of these, 237 autistic adults, 130 non-autistic adults, 100  
48  
49 carers, and 42 informant reporters completed the entire survey. Overall, a total of 295 autistic  
50  
51 adults participated including all survey formats and partial survey completions. A small  
52  
53 proportion of participants were deemed ineligible during screening (see Table 3), generally  
54  
55 due to being under 25 years, not caring for an adult aged 25+ years old, or being located  
56  
57 outside of Australia. Participants were recorded as partial completions if at close of Time 1  
58  
59  
60

1  
2  
3 their surveys contained the initial demographic items completed and some additional useable  
4 data. From available data there was no significant difference in binary gender,  $\chi^2(4, n=337) =$   
5  
6 1.07,  $p=.898$ , or approximate age [ $F(4, 4) = 2.04, p=.09$ ] based on survey commencement,  
7  
8 eligibility or completion status for the self-reporting autistic adults (see Table 1). These non-  
9  
10 significant results were also found for the non-autistic adults across gender,  $\chi^2(4, n=215)$   
11  
12 =6.98,  $p=.137$ , and age [ $F(4, 4) = 0.96, p=.43$ ].  
13  
14  
15  
16  
17  
18  
19  
20

21 **[Insert Table 3 here]**

22  
23  
24 *Time taken to complete, and satisfaction with, the survey*

25  
26  
27 Participants reported varying times taken to complete the entire survey. Self-reporting autistic  
28 participants reported between 20 minutes and 12 hours to complete with an average time of  
29  
30 156 minutes ( $n=164, SD=111$ ), though several responses ( $n=53$ ) were not easily convertible  
31  
32 to numeric values for analysis, for example “few days”, “no idea”, or no response to the item  
33  
34 ( $n=36$ ). Non-autistic, self-reporting participants reported a range of 20 minutes to 5 hours  
35  
36 with an average time of 106 minutes ( $n=98, SD=74$ ). This was significantly less than self-  
37  
38 reporting autistic adults despite their completing almost all the same measures and domains,  
39  
40  $t(260)=-3.94, p<.001, d = -.50$ . Carers took 75 minutes on average ( $n=81, SD=62$ ) and  
41  
42 informant responders took 103 minutes on average ( $n=27, SD=54$ ) to complete surveys. Most  
43  
44 participants (64%,  $n=482$ ) reported that they were satisfied or very satisfied with the survey;  
45  
46 few participants were dissatisfied (6%) (Figure 1). There was no association between time  
47  
48 taken to complete the self-report survey and level of satisfaction ( $n=262, r_s = .10, p=.09$ ), and  
49  
50 no difference in satisfaction based on survey type,  $\chi^2(9, n=482) = 11.2, p=.26$ .  
51  
52  
53  
54  
55  
56  
57

58 **[Insert Figure 1 here]**

1  
2  
3 Across self-reporting autistic adults, the most common negative feedback related to difficulty  
4 with literal interpretations of forced response items ( $n=38$ ) where participants felt the options  
5 provided did not match their circumstances, or to the length of the survey ( $n=17$ ). Several  
6 participants provided feedback that they were grateful for research in this area ( $n=27$ ). Many  
7 additional topics of interest were suggested, with the most common being relationships,  
8 bullying, gender and sexuality, a more detailed employment section. The potential removal of  
9 some questionnaires (e.g., the Brief COPE) was also commented on. Revision of items  
10 referring to social supports was suggested, as some participants found these upsetting ( $n=12$ )  
11 and / or confusing ( $n=7$ ), with comments such as “I had to really think about my social circle  
12 and realised the limited number of truly reliable and trustworthy friends I actually have,  
13 which was kind of depressing”.

#### 34 *Summary of participant characteristics*

35 The age of autistic participants ranged from 25 to 80 years, with a high proportion of females  
36 (50%,  $n=295$ ) across all autistic samples. Across all autistic participants 36% were living as a  
37 couple with 25% of the sample currently married. Over half (57%,  $n=42$ ) of the informant  
38 report sample lived with their parents (see Table 4), in contrast to self-reporting autistic  
39 adults who most frequently lived as a couple (45%,  $n=295$ ) or alone (26%,  $n=295$ ). Self-  
40 reporting autistic adults did not differ from control participants on rural / remoteness  
41 according to Australian Statistical Geography Standard-Remoteness Area (ASGS-RA)  
42 classification,  $\chi^2(4, n=378) = 9.36, p=.05, V = .16$  ( $n=21$  missing), with no control  
43 participants and minimal autistic participants living in remote or very remote Australia.  
44 Propensity to greater socioeconomic disadvantage according to the postcode-based  
45 Socioeconomic Index for Areas (SEIFA) decile was significant,  $t(376)=2.96, p<.01, d = .32$   
46 ( $n=21$  missing, NB. SEIFA / rurality not available for all postcodes), though they were still  
47  
48  
49  
50  
51  
52  
53  
54  
55  
56  
57  
58  
59  
60

1  
2  
3 above average compared to the Australian population. Time 2 data gathering will seek to  
4  
5 gather household income data to more accurately determine socioeconomic disadvantage.  
6  
7

8  
9 Of the formally diagnosed autistic adults ( $n=221$ ), 132 (56%) reported they have a diagnostic  
10  
11 report available, with 169 (76%) diagnosed by one clinician and 29 (13%) reporting diagnosis  
12  
13 by two or more clinicians ( $n=23$  missing). As shown in Table 5, the majority (97%,  $n=295$ )  
14  
15 of all autistic participants met the AQ-Short cut-off for identifying autism, compared to 30%  
16  
17 ( $n=60$ ) of biologically related carers and 22% ( $n=137$ ) of non-autistic control participants.

18  
19 Asperger's syndrome was the most frequently reported formal diagnosis. Self-reporting,  
20  
21 formally diagnosed autistic participants on average were diagnosed 6.9 years prior to survey  
22  
23 completion, and the majority (90%;  $n=217$ , 4 missing) received their diagnosis in adulthood.  
24  
25 A preliminary analysis of gender differences for self-reporting autistic adults was also  
26  
27 conducted. In comparison to males, self-reporting formally diagnosed females did not differ  
28  
29 significantly on age of diagnosis  $t(192)=.39$ ,  $p=.70$ ,  $d=.06$  ( $n=4$  missing). Comparing males  
30  
31 with females, including non-diagnosed autistic adults, there was no difference in number of  
32  
33 individuals currently married or in a defacto relationship,  $X^2(1, n=241) = .78$ ,  $p=.38$ ,  $V = -.06$ ,  
34  
35 or in their educational status,  $X^2(2, n=241) = 4.66$ ,  $p=.10$ ,  $V = .14$ . Females were significantly  
36  
37 different regarding employment status  $X^2(4, n=219) = 18.77$ ,  $p=.001$ ,  $V = .29$ , though only  
38  
39 relating to the number providing homecare ( $n=19$  female vs.  $n=1$  male, see Table 4).  
40  
41  
42  
43  
44  
45

46  
47 In the non-autistic control sample, participant ages ranged from 25 to 79 years, with a high  
48  
49 proportion (80%,  $n=146$ ) of females. The majority lived as a couple (72%) and were married  
50  
51 (62%). The control sample was significantly different from the self-reporting autistic adults  
52  
53 (with and without a formal diagnosis) on several demographics including gender,  $X^2(2,$   
54  
55  $n=399) = 26.5$ ,  $p<.001$ ,  $V = .26$ , living situation,  $X^2(5, n=399) = 33.2$ ,  $p<.001$ ,  $V = .29$ ,  
56  
57 marital status,  $X^2(8, n=398) = 47.1$ ,  $p<.001$ ,  $V = .34$ , ( $n=1$  missing), employment status,  $X^2(6,$   
58  
59  $n=367) = 18.3$ ,  $p=.005$ ,  $V = .22$  ( $n=32$  missing), and higher education status,  $X^2(2, n=399) =$   
60



1  
2  
3 22.4,  $p < .001$ ,  $V = .24$ . Of interest, differences in education and employment were not  
4  
5 significant if analyses were limited to male participants. The control sample was also  
6  
7 significantly less likely to meet the DSM-IV-TR linked PHQ-9 cut-off for depression,  $X^2(1,$   
8  
9  $n=354) = 54.9$ ,  $p < .001$ ,  $V = .39$ , ( $n=45$  missing), less likely meet the DSM5 GAD-A cut-off<sup>74</sup>  
10  
11 for anxiety,  $X^2(1, n=366) = 67.8$ ,  $p < .001$ ,  $V = .43$  ( $n=33$  missing), and less likely to have a  
12  
13 history of psychiatric illness,  $X^2(1, n=384) = 82.1$ ,  $p < .001$ ,  $V = .46$  ( $n=15$  missing), compared  
14  
15 to self-reporting autistic adults, and remained significant if limited to female or male  
16  
17 participants. There were no significant differences for self-reporting autistic adults missing  
18  
19 data on the PHQ-9 or DSM5 GAD-A based on age, gender or AQ score.  
20  
21  
22

23  
24  
25 As shown in Table 6, the majority (43%;  $n=98$ , 4 missing) of carers were mothers of an  
26  
27 autistic adult, followed by partners or spouses (23%). Carers' ages ranged from 21 to 78  
28  
29 years. The majority were female (83%,  $n=102$ ), married (66%), and living as a couple (75%).  
30  
31 Carers spent an average 63.4 ( $SD=57.80$ ,  $n=92$ ) hours per week with the adult with autism,  
32  
33 and the average age of the autistic adult cared for was 37.5 years (range 25-96 years,  
34  
35  $SD=13.21$ ). Most carer participants (76%,  $n=102$ ) are linked to a self-report or informant-  
36  
37 report responses.  
38  
39  
40

41 [insert Table 4 here]

42 [insert Table 5 here]

43 [insert Table 6 here]

## 44 45 46 47 48 49 50 51 Findings to date

52  
53  
54 Using an inclusive research approach, the ALSAA has collected a detailed profile of the  
55  
56 physical and mental health, productivity, wellbeing and health service use of autistic adults  
57  
58 aged 25+ years, and their carers, living in Australia. There were high numbers of recruitment  
59  
60

1  
2  
3 responses across the four Time 1 survey populations (autistic and control adult self-report,  
4 informant report on autistic adults, carer self-report). The ALSAA Time 1 data has been used  
5 in several studies of psychotropic medication use<sup>75</sup>, leisure participation<sup>76</sup>, ageing well<sup>77</sup>,  
6 loneliness<sup>60</sup> and employment<sup>78</sup>. ALSAA and SASLA pooled data has been used to explore  
7 cognitive reappraisal<sup>79</sup>, suicidal ideation<sup>80</sup>, psychometric scale validation<sup>64</sup>, and anxiety and  
8 depression<sup>81</sup>. Several other outputs are in development, with focus on health service barriers  
9 and usage, caregivers, impact of diagnosis in adulthood, further scale validations,  
10 longitudinal analyses of loneliness, suicidal ideation, mental illness risk factors, and other  
11 outputs, meeting the broad aim of the study to describe and compare the profiles of  
12 Australian autistic adults. Exploratory analyses have highlighted factors such as gender,  
13 education and employment that are potential confounders or covariates that need to be  
14 considered in future analyses.

### *Participant characteristics*

15  
16  
17 A large number of females on the spectrum ( $n=150$ ) have participated in the ALSAA. This  
18 will provide an opportunity to explore the different expression of autism characteristics in  
19 females without intellectual disability<sup>5, 82</sup>. Similar to findings in other studies<sup>10, 32</sup>, self-  
20 reporting autistic adults had high rates of depression (52%), anxiety (55%), and a frequent  
21 history of psychiatric diagnosis (89%), significantly more than the control sample. They were  
22 less likely to have a university education compared with the control sample.

### *Questionnaire feedback and completion*

23  
24  
25 The length of the surveys may have led to some participants not completing following  
26 registration, or to missing data or only partial completions. Longer survey length has been  
27 linked to lower participation and completion of web-based surveys<sup>83, 84</sup>. Despite emphasising  
28 the ability to complete over several sessions, some participants commented that the survey  
29  
30  
31  
32  
33  
34  
35  
36  
37  
38  
39  
40  
41  
42  
43  
44  
45  
46  
47  
48  
49  
50  
51  
52  
53  
54  
55  
56  
57  
58  
59  
60

1  
2  
3 was “too long”. In contrast, survey length was not identified as an issue during pilot testing,  
4  
5 time to complete was not related to survey satisfaction, and some participants appreciated the  
6  
7 comprehensive nature of the surveys. Suggestions made in questionnaire feedback will be  
8  
9 incorporated in the design of the 2-year follow up. Follow-up design aims to reduce  
10  
11 assessment burden by reducing overall survey length and where appropriate pre-filling  
12  
13 repeated measures such as medical history. Additional areas of interest to the community will  
14  
15 be explored including bullying, relationships and terms used to describe individuals with an  
16  
17 autism spectrum diagnosis.  
18  
19  
20  
21

### 22 **Strengths and limitations**

23  
24  
25 An important strength of the study was the inclusive research approach using autistic  
26  
27 advisors. Frequently missing from autism research and other longitudinal studies, an  
28  
29 inclusive research protocol was developed for the ALSAA in consultation with autistic  
30  
31 advisors (see Table 1) and applied across all stages of the research process apart from the  
32  
33 analysis. Inclusive research has been found to increase the likelihood that findings are  
34  
35 translatable to the real world and focused on areas of need from community perspectives<sup>44</sup>.  
36  
37 Best-practise processes of conducting inclusive research with autistic adults are not well  
38  
39 known, though more resources are becoming available<sup>85</sup>. Although at times advisors’  
40  
41 suggestions were in conflict with each other or beyond the scope of the study, as each advisor  
42  
43 communicated individually with the research team there was no direct conflict between  
44  
45 advisors. Feedback is given to advisors as to what advice has been used or not, and why.  
46  
47 Although this potentially creates a power imbalance between the advisors and researchers,  
48  
49 which is also inherent in an advisory process, to date there has been little feedback from  
50  
51 advisors that was not able to be incorporated into the study processes or outputs. Ideally  
52  
53 autistic adults and researchers would reach consensus in an open forum in person. Due to  
54  
55 limitations with resourcing, geographical dispersion and majority of autistic advisors  
56  
57  
58  
59  
60

1  
2  
3 preferring to provide individual feedback in writing this was difficult to achieve. Moving  
4  
5 forwards, we are considering implementing the “Five-Finger Decision Method”<sup>86</sup> to ensure  
6  
7 advisors input has been addressed. Little literature was available at the time of commencing  
8  
9 the ALSAA and processes were developed iteratively based on understanding of partnering  
10  
11 with autistic adults and guidance from our advisors. Our processes are largely consistent with  
12  
13 recent guidelines now available<sup>58</sup>, with deviation particularly relating to recruiting a balance  
14  
15 of autistic community leaders and other autistic adults as advisors, a structured process for  
16  
17 decision making, and a lack of joint meetings / collaboration between advisors / a visioning  
18  
19 exercise. We may benefit from again consulting with our advisors and seeing if there is  
20  
21 interest in additional areas of involvement or additional peer-researched co-authored outputs.  
22  
23 Growing relationships with advisors over time, and seeking feedback as to preferences for  
24  
25 collaboration, has led to harmonious collaborative relationships between the ALSAA  
26  
27 researchers and advisors, and will continue to evolve. An important consideration working  
28  
29 with the advisors is the allowance of lead time and processing time, which has created  
30  
31 difficulty for some student projects using ALSAA data. The ALSAA has further engaged  
32  
33 peer researchers in some future outputs, including a study on autistic burnout, and the co-  
34  
35 development of research grant applications for other projects. An additional strength of the  
36  
37 ALSAA design is its consideration and partial overlap with several other national and  
38  
39 international studies, for example overlap with the Autism CRC SASLA longitudinal study  
40  
41 allows for a lifespan approach to be taken including data from late adolescence<sup>79</sup>.  
42  
43  
44  
45  
46  
47  
48  
49  
50  
51

52  
53 The ALSAA baseline sample is reflective of the convenience sampling methodology used.  
54  
55 Participants would appear non-representative of the Australian autism population given  
56  
57 approximate postcode-based above average socioeconomic status, a large female gender bias  
58  
59 for both autistic adults and controls, and that most of the autistic sample (85%) does not have  
60

1  
2  
3 an intellectual disability. Earlier epidemiological estimates of autism<sup>23</sup> would suggest a larger  
4 proportion of people with a diagnosis of autism and intellectual disability and a much higher  
5 male to female ratio, though recent work questions these assumptions<sup>2, 87</sup>. Self-selection in  
6 online surveys can lead to a female gender bias<sup>84</sup>, as also has been noted in other online  
7 autism research<sup>88-90</sup>. Commonly reported as a 4 to 1 male bias<sup>91</sup>, there is suggestion the true  
8 autism gender ratio may be closer to 3 to 1<sup>87</sup> or lower<sup>82</sup> as females with autism are at a higher  
9 risk of being underdiagnosed<sup>3</sup>. Limiting recruitment to participants age 25 years or older,  
10 changing diagnostic practices<sup>92</sup>, in combination with the convenience sampling, has likely led  
11 to the large percentage of participants who had received their autism diagnosis in adulthood.  
12  
13  
14  
15  
16  
17  
18  
19  
20  
21  
22

23  
24 The majority of the current autistic sample does not have an intellectual disability. Significant  
25 barriers exist for people with intellectual disability to participate in a questionnaire-based  
26 study<sup>93</sup>. An alternative to directly gathering information from adults on the spectrum with  
27 intellectual disability is the participation via an informant respondent. Although an informant  
28 respondent survey was made available for the ALSAA, and despite targeted recruitment  
29 efforts, there was low participation of people with intellectual disability.  
30  
31  
32  
33  
34  
35  
36  
37  
38

39 A final limitation is the self-report questionnaire format of the ALSAA, particularly in  
40 relation to self-reported diagnosis of autism and comorbid conditions without clinical  
41 reassessment. Validating autism diagnosis through clinical reassessment would be a highly  
42 resource intensive exercise in a nationwide study in Australia and is beyond the resourcing  
43 available to this study. This is offset by gathering of additional information relating to autism  
44 diagnosis, including asking if the respondent has a diagnostic report, name and type of  
45 clinician providing diagnosis, and AQ scores. These variables could be used to identify  
46 subsamples with stronger evidence of definite diagnosis of autism for separate analysis where  
47 necessary depending on the specific research question. Further, diagnostic reports from  
48 participants will be requested from participants at follow-up to confirm diagnosis. Gathering  
49  
50  
51  
52  
53  
54  
55  
56  
57  
58  
59  
60

1  
2  
3 data from adults without a formal diagnosis is potentially a strength, given the ‘lost  
4  
5 generation’ of autistic adults<sup>3</sup>, significant barriers to diagnosis, and accuracy issues with gold  
6  
7 standard autism assessment tools<sup>94</sup>; these participants could be overlooked in other studies  
8  
9 though they represent an important hidden population group. The self-report format also  
10  
11 prevents the quantification of participants’ cognitive ability. The use of standardised mental  
12  
13 health screening measures with clinical cut-offs gathers some information on co-occurring  
14  
15 mental health conditions, though not as reliably as would be available via clinical interview.  
16  
17 Conversely, community-based sampling and use of self-report questionnaires does allow for  
18  
19 gathering a reasonably large sample, offsetting the risk of including people with incorrect  
20  
21 diagnostic data with increased statistical power and the potential severity bias of clinical  
22  
23 samples. Limitations and strengths of the ALSAA study design will largely depend on the  
24  
25 specific research question being explored, with sufficient sample size and data points to  
26  
27 partial-out subgroups and non-matched controls or to account for common method variance  
28  
29 as needed. Future researchers using the ALSAA dataset will need to consider balancing type  
30  
31 1 and type 2 errors<sup>73</sup>. A data governance structure has been established, with requests for  
32  
33 ALSAA data requiring researchers to outline a statistical plan and data points they will be  
34  
35 using, which will assist in managing any concerns of multiple statistical testing without  
36  
37 correction. Any data requests will need to ensure that the hypotheses being tested do not  
38  
39 duplicate use of data points in a way that would inflate the probability of Type 1 errors.  
40  
41  
42  
43  
44  
45  
46  
47

### 48 *Implications*

49  
50  
51 There is a significant knowledge gap regarding the lives of autistic adults. The ALSAA has  
52  
53 gathered a large comprehensive dataset relating to autistic adults and their carers, creating a  
54  
55 platform for longitudinal follow-up and collaborative research. The ALSAA is an important  
56  
57 resource for exploring multiple research questions regarding the lives of autistic adults.  
58  
59 However, as with all longitudinal research caution is required in drawing firm conclusions  
60

1  
2  
3 from the ALSAA cohort in relation to the entire Australian autism population. Nevertheless,  
4 this cohort provides the first opportunity to explore longitudinal outcomes of Australian  
5 autistic adults. Having offline and informant versions of questionnaires, and questionnaires  
6 reviewed by autistic advisors, facilitates greater accessibility for participants on the spectrum  
7 and their carers.  
8  
9

10  
11  
12  
13  
14  
15 The ALSAA study demonstrates a working approach to inclusive research with autistic  
16 advisors. The inclusive research protocol developed in this study provides a useful basis for  
17 other research endeavours. Following this protocol, future outputs such as peer-reviewed  
18 manuscripts, presentations and reports from the ALSAA will also be developed in  
19 consultation with autistic advisors or autistic peer researchers. Input from autistic advisors  
20 has already improved the quality and relevance of initial outputs<sup>75</sup>, for example identifying  
21 potential alternative interpretations of findings based on lived experiences, potential  
22 differences in autistic interpretations of scale items, and modifying the methodology in one  
23 instance<sup>60</sup> changing a purely quantitative study into a mixed methods design.  
24  
25  
26  
27  
28  
29  
30  
31  
32  
33  
34  
35  
36

37 Some measures used in the ALSAA have not yet been validated with autistic adult samples  
38 (e.g., DSM5 GAD-A, Emotion Regulation Questionnaire, PHQ-15). The ALSAA provides  
39 the opportunity to explore the validity of these commonly used measures.  
40  
41  
42  
43  
44

### 45 **Collaboration**

46  
47 International studies involving autistic adults and utilising standardised measures are  
48 underway in the United States, Netherlands and United Kingdom (e.g., SPARK  
49 <http://sparkforautism.org>, AASPIRE <https://aaspire.org/>, the Netherlands Autism Register  
50 <https://www.nederlandsautismeregister.nl> and the Adult Autism Spectrum Cohort-UK  
51 <http://research.ncl.ac.uk/adultautismspectrum/>), though with less comprehensive ranges of  
52 measures. During development of the ALSAA, consultation with international groups  
53  
54  
55  
56  
57  
58  
59  
60

1  
2  
3 occurred to ensure there were some synergies with these studies. Future international  
4  
5 comparisons will be possible, including pooling of data. This will allow for the creation of  
6  
7 much larger datasets and more in-depth understanding of life in adulthood for autistic people.  
8  
9  
10  
11  
12  
13  
14  
15  
16  
17  
18  
19  
20  
21  
22  
23  
24  
25  
26  
27  
28  
29  
30  
31  
32  
33  
34  
35  
36  
37  
38  
39  
40  
41  
42  
43  
44  
45  
46  
47  
48  
49  
50  
51  
52  
53  
54  
55  
56  
57  
58  
59  
60

For peer review only



## Further details

### Contributors

Manuscript drafting was jointly led by SA & KF. All authors (YH,AR,MU,LL,RC,TF,MF,NL,AU,JT) had a role in the conduct of the research, interpretation of results, drafting of manuscript and critical review of the manuscript. SA, KF, YH, AR, MU & JT conducted data analysis and reporting. KF, YH, AR, MU, RC, TF, MF, NL, AU & JT were involved in the conceptualisation of the study.

### Data Sharing Statement

Processes to establish data banking and sharing procedures are currently being finalised. Please email the corresponding author regarding queries.

### Ethics approval

The study was approved by the Human Research Ethics Committee at UNSW Sydney, Australia (No. HC15001).

### Acknowledgements

The authors also acknowledge the valuable contribution of the Research Advisory Network members Matthew Bennett, Bob Boyce, Jen Harland, Julianne Higgins, Gabriel Nakhel, Joanne Mahony, Andrea Michael, Cheryl Strangio, and Chris Tanner whose insight and recommendations shaped this work. We also gratefully acknowledge the cooperation and participation of all participants on the autism spectrum and their carers involved in this study.

## Funding

This work was supported by the Cooperative Research Centre for Living with Autism (Autism CRC), established and supported under the Australian Government's Cooperative Research Centres Program.

## Conflict of Interest

The authors have no conflict of interest to report.

## References

1. Seltzer MM, Shattuck PT, Abbeduto L, Greenberg JS. Trajectory of development in adolescents and adults with autism. *Mental Retardation and Developmental Disabilities*. 2004;10:234-47.
2. Brugha TS, Spiers N, Bankart J, Cooper S-A, McManus S, Scott FJ, et al. Epidemiology of autism in adults across age groups and ability levels. *The British Journal of Psychiatry*. 2016/12/01/;209(6):498-503. en.
3. Lai M-C, Baron-Cohen S. Identifying the lost generation of adults with autism spectrum conditions. *The Lancet Psychiatry*. 2015 2015/11/01/;2(11):1013-27.
4. Van Wijngaarden-Cremers PJM, van Eeten E, Groen WB, Van Deurzen PA, Oosterling IJ, Van der Gaag RJ. Gender and Age Differences in the Core Triad of Impairments in Autism Spectrum Disorders: A Systematic Review and Meta-analysis. *Journal of Autism and Developmental Disorders*. 2014 March 01;44(3):627-35.
5. Bargiela S, Steward R, Mandy W. The Experiences of Late-diagnosed Women with Autism Spectrum Conditions: An Investigation of the Female Autism Phenotype. *Journal of Autism and Developmental Disorders*. 2016 2016/10/01/;46(10):3281-94. en.
6. Jang J, Matson JL, Adams HL, Konst MJ, Cervantes PE, Goldin RL. What are the ages of persons studied in autism research: A 20-year review. *Research in Autism Spectrum Disorders*. 2014;8(12):1756-60.
7. Howlin P, Moss P. Adults with autism spectrum disorders. *Canadian Journal of Psychiatry*. 2012;57(5):275-83.
8. Nicolaidis C. Autism in Adulthood: The New Home for Our Emerging Field. *Autism in Adulthood*. 2018;1(1):1-2.
9. Michael C. Why we need research about autism and ageing. *Autism*. 2016;20(5):515-6.
10. Howlin P, Magiati I. Autism spectrum disorder: outcomes in adulthood. *Current Opinion in Psychiatry*. 2017 2017/03//;30(2):69-76. en.
11. Cashin A, Buckley T, Trollor J, Lennox N. A scoping review of what is known of the physical health of adults with autism spectrum disorder. *Journal of Intellectual Disabilities*. 2016.
12. Croen LA, Zerbo O, Qian Y, Massolo M, Rich S, Sidney S, et al. The health status of adults on the autism spectrum. *Autism*. 2015;19(7):814-23.
13. Jones KB, Cottle K, Bakian A, Farley M, Bilder D, Coon H, et al. A description of medical conditions in adults with autism spectrum disorder: a follow-up of the 1980s Utah/UCLA autism epidemiologic study. *Autism*. 2016;5:551-61.
14. Weiss JA, Riosa PB. Thriving in youth with autism spectrum disorder and intellectual disability. *Journal of Autism and Developmental Disorders*. 2015;45:2474-86.
15. Buck TR, Viskochil J, Farley M, Coon H, McMahon WM, Morgan J, et al. Psychiatric comorbidity and medication use in adults with autism spectrum disorder. *Journal of Autism and Developmental Disorders*. 2014;44:3063-71.
16. Hedley D, Uljarević M, Wilmot M, Richdale A, Dissanayake C. Understanding depression and thoughts of self-harm in autism: A potential mechanism involving loneliness. *Research in Autism Spectrum Disorders*. 2018 2018/02/01/;46:1-7.
17. Lever AG, Geurts HM. Psychiatric co-occurring symptoms and disorders in young, middle-aged, and older adults with autism spectrum disorders. *Journal of Autism and Developmental Disorders*. 2016;46:1916-30.
18. Matson JL, Williams LW. Depression and mood disorders among persons with Autism spectrum disorders. *Research in Developmental Disabilities*. 2014;35:2003-7.
19. Moss P, Howlin P, Savage S, Bolton P, Rutter M. Self and informant reports of mental health difficulties among adults with autism findings from a long-term follow-up study. *Autism*. 2015.
20. Hedley D, Uljarević M, Wilmot M, Richdale A, Dissanayake C. Brief Report: Social Support, Depression and Suicidal Ideation in Adults with Autism Spectrum Disorder. *Journal of Autism and Developmental Disorders*. 2017 November 01;47(11):3669-77.

21. Hirvikoski T, Mittendorfer-Rutz E, Boman M, Larsson H, Lichtenstein P, Bolte S. Premature mortality in autism spectrum disorder. *The British Journal of Psychiatry*. 2015.
22. Matson JL, Nebel-Schwalm N. Comorbid psychopathology with autism spectrum disorder in children: an overview. *Research in Developmental Disabilities*. 2007;28:341-52.
23. Fombonne E. Epidemiology surveys of autism and other pervasive developmental disorders: an update. *Journal of Autism and Developmental Disorders*. 2003;33(4):365-82.
24. LaMalfa G, Lassi G, Bertilli M, Salvani R, Placidi GF. Autism and intellectual disability: a study of prevalence on a sample of the Italian population. *Journal of Intellectual Disability Research*. 2004;48:262-7.
25. Matson JL, Shoemaker M. Intellectual disability and its relationship to autism spectrum disorders. *Research in Developmental Disabilities*. 2009;30:1107-14.
26. Dawson M, Soulières I, Gernsbacher MA, Mottron L. The level and nature of autistic intelligence. *Psychol Sci*. 2007;18(8):657-62. PubMed PMID: 17680932. eng.
27. Howlin P, Arciuli J, Begeer S, Brock J, Clarke K, Costley D, et al. Research on adults with autism spectrum disorder: roundtable report. *Journal of Intellectual and Developmental Disability*. 2015;40(4):388-93.
28. Hedley D, Uljarevic M, Cameron L, Halder S, Richdale AL, Dissanayake C. Employment programmes and interventions targeting adults with autism spectrum disorder: a systematic review of the literature. *Autism*. 2016:1-13.
29. Gray KM, Piccin AK, C. M., Taffe J, Parmenter TR, Hofer S, Einfeld S, et al. Outcomes in young adulthood: are we achieving community participation and inclusion? *Journal of Intellectual Disability Research*. 2014;58(8):734-45.
30. Henninger NA, Taylor JL. Outcomes in adults with autism spectrum disorders: a historical perspective. *Autism*. 2013;17(1):103-16.
31. Howlin P, Moss P, Savage S, Rutter. Social outcomes in mid- to later adulthood among individuals diagnosed with autism and average nonverbal IQ as children. *Journal of American Academy of Child & Adolescent Psychiatry*. 2013;52(6):572-81.
32. Magiati I, Tay XW, Howlin P. Cognitive, language, social and behavioural outcomes in adults with autism spectrum disorders: a systematic review of longitudinal follow-up studies in adulthood. *Clinical Psychology Review*. 2014;34:73-86.
33. Marriage S, Wolverton A, Marriage K. Autism spectrum disorder grown up: A chart review of adult functioning. *Journal of the Canadian Academy of Child and Adolescent Psychiatry*. 2009;18(4):322.
34. Levy A, Perry A. Outcomes in adolescents and adults with autism: a review of the literature. *Research in Autism Spectrum Disorders*. 2011;5:1271-82.
35. Seltzer MM, Krauss MW, Shattuck PT, Orsmond GI, Swe A, Lord C. The symptoms of autism spectrum disorders in adolescence and adulthood. *Journal of Autism and Developmental Disorders*. 2003;33:565-81.
36. Shattuck PT, Selter MM, Greenberg JS, Orsmond GI, Bolt D, Kring S, et al. Change in autism symptoms and maladaptive behaviors in adolescents and adults with an autism spectrum disorder. *Journal of Autism and Developmental Disorders*. 2007;37:1735-47.
37. Happe F, Charlton RA. Aging in autism spectrum disorders: a mini-review. *Gerontology*. 2010;58:70-8.
38. Totsika V, Felce D, Kerr M, Hastings RP. Behaviour problems, psychiatric symptoms, and quality of life for older adults with intellectual disability with and without autism. *Journal of Autism and Developmental Disorders*. 2010;40:1171-8.
39. Khanna R, K. J-P, West-Strum D, Mahabaleshwarkar R. Health-related quality of life and its determinants among adults with autism. *Research in Autism Spectrum Disorders*. 2014;8(3):157-67.
40. Pellicano E, Dinsmore A, Charman T. What should autism research focus upon? Community views and priorities from the United Kingdom. *Autism*. 2014:1-5.

- 1
- 2
- 3
- 4 41. Nicolaidis C. What Can Physicians Learn from the Neurodiversity Movement? . American
- 5 Medical Association Journal of Ethics. 2012;14(6):503-10.
- 6 42. Nicolaidis C, Raymaker D, Dern S, Boisclair C, Ashkenazy E, Baggs A. Comparison of
- 7 healthcare experiences in autistic and non-autistic adults: a cross-sectional online survey facilitated
- 8 by an academic-community partnership. *Journal of General Internal Medicine*. 2012;28(6):761-9.
- 9 43. Kapp SK, Steward R, Crane L, Elliott D, Elphick C, Pellicano E, et al. 'People should be allowed
- 10 to do what they like': Autistic adults' views and experiences of stimming. *Autism*.
- 11 2019;1362361319829628.
- 12 44. Walmsley J, Johnson K. Inclusive research with people with learning disabilities: Past,
- 13 present and futures. London and New York: Jessica Kingsley Publishers 2003.
- 14 45. Bigby C, Frawley P, Ramcharan P. Conceptualising inclusive research with people with
- 15 intellectual disability. *Journal of Applied Research in Intellectual Disabilities*. 2014;27(1):3-12.
- 16 46. Bagatell N. From cure to community: transforming notions of autism. *Journal of the Society*
- 17 *for Psychological Anthropology*. 2010;38(1):33-55.
- 18 47. Milton D, Bracher M. Autistics speak but are they heard? *Medical Sociology Online*.
- 19 2013;7:61-9.
- 20 48. Nind M, Vinha H. Doing research inclusively: bridges to multiple possibilities in inclusive
- 21 research. *British Journal of Learning Disabilities*. 2012;42:102-9.
- 22 49. Gatfield O, Mangan C, Haar T, Kinninurgh A, Rodger S. 2016 Research Priorities Survey
- 23 Report. Brisbane, Queensland, Australia: Cooperative Research Centre for Living with Autism, 2016.
- 24 50. Gotham K, Marvin AR, Talyor JL, Warren Z, Anderson CM, Law PA, et al. Characterizing the
- 25 daily life, needs, and priorities of adults with autism spectrum disorder from Interactive Autism
- 26 Network. *Autism*. 2015:1-11.
- 27 51. McConachie H, Mason D, Parr JR, Garland D, Wilson C, Rodgers J. Enhancing the Validity of a
- 28 Quality of Life Measure for Autistic People. *J Autism Dev Disord*. 2018 May;48(5):1596-611. PubMed
- 29 PMID: 29188584. Pubmed Central PMCID: PMC5889785. Epub 2017/12/01. eng.
- 30 52. Seltzer MM, Greenberg JS, Taylor JL, Smith LE, Orsmond GE, Esbensen A, et al. Adolescents
- 31 and adults with autism spectrum disorders. In: Amaral DG, Dawson G, Geschwind D, editors. *Autism*
- 32 *spectrum disorders* New York: Oxford University Press; 2011.
- 33 53. Lawson L, Hascheck A, Richdale AL. SASLA Snapshot: Study of Australian School-Leavers with
- 34 Autism – Baseline Profile. Melbourne, Australia: Olga Tennison Autism Research Centre (OTARC), La
- 35 Trobe University, 2018.
- 36 54. Haas K, Costley D, Falkmer M, Richdale A, Sofronoff K, Falkmer T. Factors Influencing the
- 37 Research Participation of Adults with Autism Spectrum Disorders. *J Autism Dev Disord*. 2016
- 38 May;46(5):1793-805. PubMed PMID: 26810436. Epub 2016/01/27. eng.
- 39 55. Walmsley J. Normalisation, emancipatory research and inclusive research in learning
- 40 disability. *Disability & Society*. 2001;16(2):188-205.
- 41 56. CRC A. Inclusive research practice guide and checklists for autism research: Version 2.
- 42 Brisbane, Queensland: Autism CRC Ltd., 2016.
- 43 57. Nicolaidis C, Raymaker D, Katz M, Oshwald M, Goe R, Leottie S, et al. Community-based
- 44 participatory research to adapt health measures for use by people with developmental disabilities.
- 45 *Progress in Community Health Partnerships: Research, Education, and Action*. 2015;9(2):141-3.
- 46 58. Nicolaidis C, Raymaker D, Kapp SK, Baggs A, Ashkenazy E, McDonald K, et al. The AASPIRE
- 47 practice-based guidelines for the inclusion of autistic adults in research as co-researchers and study
- 48 participants. *Autism*. 2019;23(8):2007-19. PubMed PMID: 30939892.
- 49 59. Jivraj J, Sacrey L-A, Newton A, Nicholas D, Zwaigenbaum L. Assessing the influence of
- 50 researcher-partner involvement on the process and outcomes of participatory research in autism
- 51 spectrum disorder and neurodevelopmental disorders: A scoping review. *Autism*. 2014;18(7):782-93.
- 52 PubMed PMID: 24989447.
- 53 60. Ee D, Hwang J, Reppermund S, Srasuebkuul P, Trollor J, Foley K-R, et al. Loneliness in Adults
- 54 on the Autism Spectrum. *Autism in Adulthood*. 2019;3(1):11.
- 55
- 56
- 57
- 58
- 59
- 60

- 1
- 2
- 3
- 4 61. Kroenke K, Spitzer RL, Williams JBW. The PHQ-9: validity of a brief depression severity
- 5 measure. *Journal of General Internal Medicine*. 2001;16:606-13.
- 6 62. Khanna R, K. J-P, West-Strum D. Validity and reliability of the Medical Outcomes Study Short-
- 7 Form Health Survey version 2 (SF-12v2) among adults with autism. *Research in Developmental*
- 8 *Disabilities*. 2015;43-44:51-60.
- 9 63. Barrett SL, Uljarević M, Baker EK, Richdale AL, Jones CRG, Leekam SR. The Adult Repetitive
- 10 Behaviours Questionnaire-2 (RBQ-2A): A Self-Report Measure of Restricted and Repetitive
- 11 Behaviours. *Journal of Autism and Developmental Disorders*. 2015 2015/11/01/;45(11):3680-92.
- 12 64. Arnold SRC, Uljarevic M, Hwang J, Richdale A, Trollor J, Lawson LP. Brief Report:
- 13 Psychometric Properties of the Patient Health Questionnaire-9 (PHQ-9) in Autistic Adults. *Journal of*
- 14 *Autism and Developmental Disorders*. 2019:1-9.
- 15 65. Whitehouse AJO, Bishop DVM. Communication checklist - adult. London: The Psychological
- 16 Corporation; 2009.
- 17 66. (AIHW) AloHaW. Autism in Australia. Web Report. Canberra, Australia: AIHW, 2017 5-4-17.
- 18 Report No.
- 19 67. Hoekstra RA, Vinkhuyzen AAE, Wheelwright S, Bartels M, Boomsma DI, Baron-Cohen S, et al.
- 20 The construction and validation of an abridged version of the Autism-Spectrum Quotient. *Journal of*
- 21 *Autism and Developmental Disorders*. 2011;41:589-96.
- 22 68. Lundqvist L-O, Lindner H. Is the Autism-Spectrum Quotient a Valid Measure of Traits
- 23 Associated with the Autism Spectrum? A Rasch Validation in Adults with and Without Autism
- 24 Spectrum Disorders. *Journal of Autism and Developmental Disorders*. 2017 July 01;47(7):2080-91.
- 25 69. Eriksson JM, Andersen LMJ, Bejerot S. RAADS-14 Screen: validity of a screening tool for
- 26 autism spectrum disorder in an adult psychiatric population. *Molecular Autism*. 2013
- 27 2013/12/09;4(1):49.
- 28 70. Evans E, Trollor J, Davis A, Bhardwaj A, O'Brien E. Mental health and carer support in elders
- 29 with ID. Report to Ageing, Disability and Home Care, Department of Family and Community Services,
- 30 NSW Australia. Sydney, Australia: Department of Developmental Disability Neuropsychiatry, UNSW
- 31 Sydney, 2015.
- 32 71. StataCorp. Stata Statistical Software: Release 14. College Station, TX: StataCorp LP; 2015.
- 33 72. IBM\_Corp. IBM SPSS Statistics for Windows, Version 22.0. Armonk, NY: IBM Corp; 2013.
- 34 73. Streiner DL, Norman GR. Correction for Multiple Testing: Is There a Resolution? *Chest*. 2011
- 35 2011/07/01/;140(1):16-8.
- 36 74. Beesdo-Baum K, Klotsche J, Knappe S, Craske MG, LeBeau RT, Hoyer J, et al. Psychometric
- 37 properites of the dimensional anxiety scales for DSM-V in an unselected sample of German
- 38 treatment seeeking patients. *Depression and Anxiety*. 2012;29(12):1014-24.
- 39 75. Cvejic RC, Arnold SRC, Foley K-R, Trollor JN. Neuropsychiatric profile and psychotropic
- 40 medication use in adults with autism spectrum disorder: results from the Australian Longitudinal
- 41 Study of Adults with Autism. *BJPsych Open*. 2018;4(6):461-6. Epub 11/13.
- 42 76. Stacey T-L, Froude EH, Trollor J, Foley K-R. Leisure participation and satisfaction in autistic
- 43 adults and neurotypical adults. *Autism*. 2018;0(0):1362361318791275. PubMed PMID: 30132680.
- 44 77. Hwang YI, Foley K-R, Trollor JN. Aging Well on the Autism Spectrum: An Examination of the
- 45 Dominant Model of Successful Aging. *Journal of Autism and Developmental Disorders*. 2018 May 02.
- 46 78. Harsanyi M, Foley K-R, Froude E, Trollor J, Arnold SRC. Employment Profiles of Autistic Adults
- 47 in Australia. 2019.
- 48 79. Cai RY, Richdale AL, Foley K-R, Trollor J, Uljarević M. Brief report: Cross-sectional interactions
- 49 between expressive suppression and cognitive reappraisal and its relationship with depressive
- 50 symptoms in autism spectrum disorder. *Research in Autism Spectrum Disorders*. 2018
- 51 2018/01/01/;45:1-8.
- 52 80. Hedley D, Uljarević M, Foley K-R, Richdale A, Trollor J. Risk and protective factors underlying
- 53 depression and suicidal ideation in Autism Spectrum Disorder. *Depression and Anxiety*.
- 54 2018;35(7):648-57.
- 55
- 56
- 57
- 58
- 59
- 60

- 1
- 2
- 3
- 4 81. Uljarević M, Hedley D, Foley K-R, Magiati I, Cai RY, Dissanayake C, et al. Anxiety and
- 5 depression from adolescence to old age in autism spectrum disorder. *Journal of Autism and*
- 6 *Developmental Disorders*. 2019.
- 7 82. Baldwin S, Costley D. The experiences and needs of female adults with high-functioning
- 8 autism spectrum disorder. *Autism*. 2016;20(4):483-95. PubMed PMID: 26111537.
- 9 83. Fan W, Yan Z. Factors affecting response rates of the web survey: A systematic review.
- 10 *Computers in Human Behavior*. 2010 2010/03/01/;26(2):132-9.
- 11 84. Guo X, Vittinghoff E, Olgin JE, Marcus GM, Pletcher MJ. Volunteer Participation in the Health
- 12 eHeart Study: A Comparison with the US Population. *Scientific Reports*. 2017 2017/05/16/;7(1):1956.
- 13 En.
- 14 85. Fletcher-Watson S, Adams J, Brook K, Charman T, Crane L, Cusack J, et al. Making the future
- 15 together: Shaping autism research through meaningful participation. *Autism*.
- 16 2019;0(0):1362361318786721. PubMed PMID: 30095277.
- 17 86. Nicolaidis C, Raymaker D, McDonald K, Dern S, Ashkenazy E, Boisclair C, et al. Collaboration
- 18 strategies in nontraditional community-based participatory research partnerships: lessons from an
- 19 academic-community partnership with autistic self-advocates. *Progress in Community Health*
- 20 *Partnerships*. 2011;5(2):143-50.
- 21 87. Loomes R, Hull L, Mandy WPL. What Is the Male-to-Female Ratio in Autism Spectrum
- 22 Disorder? A Systematic Review and Meta-Analysis. *Journal of the American Academy of Child &*
- 23 *Adolescent Psychiatry*. 2017 2017/06/01/;56(6):466-74.
- 24 88. Gilmour L, Schalomon PM, Smith V. Sexuality in a community based sample of adults with
- 25 autism spectrum disorder. *Research in Autism Spectrum Disorders*. 2012 2012/01/01/;6(1):313-8.
- 26 89. Kapp SK, Gillespie-Lynch K, Sherman LE, Hutman T. Deficit, difference, or both? Autism and
- 27 neurodiversity. *Developmental Psychology*. 2013 2013/49(1):59-71. en.
- 28 90. Nicolaidis C, Raymaker D, McDonald K, Dern S, Boisclair C, Ashkenazy E, et al. Comparison of
- 29 healthcare experiences in autistic and non-autistic adults: A cross-sectional online survey facilitated
- 30 by an academic-community partnership. *Journal of General Internal Medicine*. 2013;28(6):761-9.
- 31 91. Whiteley P, Todd L, Carr K, Shattock P. Gender Ratios in Autism, Asperger Syndrome and
- 32 Autism Spectrum Disorder. *Autism Insights*; London. 2010;2:17. English.
- 33 92. Whitehouse AJO, Cooper MN, Bebbington K, Alvares G, Lin A, Wray J, et al. Evidence of a
- 34 reduction over time in the behavioral severity of autistic disorder diagnoses. *Autism Research*.
- 35 2017;10(1):179-87.
- 36 93. Chadwick D, Wesson C, Fullwood C. Internet Access by People with Intellectual Disabilities:
- 37 Inequalities and Opportunities. *Future Internet*. 2013;5(3):376-97.
- 38 94. Fusar-Poli L, Brondino N, Rocchetti M, Panisi C, Provenzani U, Damiani S, et al. Diagnosing
- 39 ASD in Adults Without ID: Accuracy of the ADOS-2 and the ADI-R. *Journal of Autism and*
- 40 *Developmental Disorders*. 2017 2017/11/01/;47(11):3370-9.
- 41 95. Robertson AE, Simmons DR. The relationship between sensory sensitivity and autistic traits
- 42 in the general population. *Journal of Autism and Developmental Disorders*. 2012;43:775-84.
- 43 96. Carleton RN, Norton PJ, Asmundson GJG. Fearing the unknown: a short version of the
- 44 intolerance of uncertainty scale. *Journal of Anxiety Disorders*. 2007;21:105-17.
- 45 97. Spitzer RL, Williams JBW, Kroenke K, Linzer M, deGruy FV, Hahn SR. Utility of new procedure
- 46 for diagnosis mental-disorders in primary-care: the PRIME-MD 1000 study. *Journal of American*
- 47 *Medical Association*. 1994;272:1749-56.
- 48 98. Ware JE, Kosinski M, Keller SD. A 12-Item Short-Form Health Survey: construction of scales
- 49 and preliminary tests of reliability and validity. *Medical care*. 1996;34(3):220.
- 50 99. Sletten DM, Suarez GA, Low PA, Mandrekar J, Singer W. COMPASS 31: A refined and
- 51 abbreviated composite autonomic symptom score. *Mayo Clinic Proceedings*. 2012;87(12):1196-201.
- 52 100. Buysse DJ, Reynolds CF, Monk TH, Berman SR, Kupfer DJ. The Pittsburgh Sleep Quality Index:
- 53 a new instrument for psychiatric practise and research. *Psychiatry Reserves*. 1989;28:193-213.
- 54
- 55
- 56
- 57
- 58
- 59
- 60

- 1  
2  
3 101. Gardisar M, Lack L, Richards H, Harris J, Gallasch J, Boundy M, et al. The Flinders Fatigue  
4 Scale: preliminary psychometric properties and clinical sensitivity of a new scale for measuring  
5 daytime fatigue associated with insomnia. *Journal of Clinical Sleep Medicine*. 2007;3(7):722-8.  
6 102. Craske MG, Wittchen H-U, Bogels S, Stein M, Andrews G, Lebeu R. Severity measure for  
7 Generalized Anxiety Disorder - adult: American Psychiatric Association; 2013.  
8 103. Tennant R, Hiller L, Fishwick R, Platt S, Joseph S, Weich S, et al. The Warwick-Edinburgh  
9 mental well-being scale (WEMWBS): development and UK validation. *Health and Quality of Life  
10 Outcomes*. 2007;5(63):1-13.  
11 104. Chen G, Gully SM, Eden D. Validation of a new general self-efficacy scale. *Organizational  
12 Research Methods*. 2001;4(1):62-83.  
13 105. Gross JJ, John OP. Individual differences in two emotion regulation processes: implications  
14 for affect, relationships, and well-being. *Journal of Personality and Social Psychology*.  
15 2003;85(2):348-62.  
16 106. Mohr C, Tonge BJ, Einfeld SL, Taffe J. The Developmental Behaviour Checklist for Adults  
17 (DBC-A) Revised. Sydney, Australia: University of Sydney and Monash University, 2011.  
18 107. Carver CS. You want to measure coping but your protocol's too long: consider the brief  
19 COPE. *International journal of behavioral medicine*. 1997;4(1):92-100. PubMed PMID: 16250744.  
20 Epub 1997/01/01. eng.  
21 108. Crook TH, 3rd, Feher EP, Larrabee GJ. Assessment of memory complaint in age-associated  
22 memory impairment: the MAC-Q. *International psychogeriatrics*. 1992 Fall;4(2):165-76. PubMed  
23 PMID: 1477304. Epub 1992/01/01. eng.  
24 109. Hays RD, DiMatteo MR. A short-form measure of loneliness. *Journal of Personality  
25 Assessment*. 1987;51:69-81.  
26 110. Sarason IG, Levine HM, Basham RB, Sarason BR. Assessing social support: the social support  
27 questionnaire. *Journal of Personality and Social Psychology*. 1983;44(1):127-39.  
28 111. The WHOQOL Group. The World Health Organization Quality of Life assessment (WHOQOL)-  
29 BREF quality of life assessment. *Psychological Medicine*. 1995;28:551-5.  
30 112. Maenner MJ, Smith LE, Hong J, Makuch R, Greenberg JS, Mailick MR. Evaluation of an  
31 activities of daily living scale for adolescents and adults with developmental disabilities. *Disability  
32 and Health Journal* 2013;6(1):8-17.  
33 113. Luciano JV, Ayuso-Mateos JL, Aguado J, Fernandez A, Serrano-Blanco A, Roca M, et al. The  
34 12-item World Health Organisation Disability Assessment Schedule (WHO-DAS II): a nonparametric  
35 item response analysis *BMC Medical Research Methodology*. 2010;10(45):1-9.  
36 114. Taylor JL, Seltzer MM. Developing a vocational index for adults with autism spectrum  
37 disorders. *Journal of Autism and Developmental Disorders*. 2012;42(12):2669-79.  
38 115. Beard JG, Ragheb MG. Measuring leisure satisfaction. *Journal of Leisure Research*.  
39 1980;12:20-33.  
40 116. Chisholm D, Knapp MRJ, Knudsen HC, Amaddeo F, Gaitte L, van Wijngaarden B, et al. Client  
41 socio-demographic and service receipt inventory - European version: development of an instrument  
42 for international research. *The British Journal of Psychiatry*. 2000;177:28-33.  
43 117. Bengtson VL, Allen KR. The life course perspective applied to families overtime. In: Boss P,  
44 Doherty W, LaRossa R, Schumm W, Steinmetz S, editors. *Sourcebook of family theories and  
45 methods: a contextual approach*. New York: Plenum Press; 1993. p. 469-98.  
46 118. McCarron M, Gill M, Lawlor B, Beagly C. A pilot study of the reliability and validity of the  
47 Caregiver Activity Survey - Intellectual disability (CAS-ID). *Journal of Intellectual Disability Research*.  
48 2002;46(8):605-12.  
49 119. Bedard M, Molloy DW, Squire L, Dubois BA, Lever JA, O'Donnell M. The Zarit Burden  
50 Interview: a new short version and screening version. *The Gerontologist*. 2001;41(5):652-7.  
51 120. Alliance NRH. The litte book of rural health numbers: Author; 2015. Available from:  
52 <https://www.ruralhealth.org.au/book/little-book-rural-health-numbers>.  
53  
54  
55  
56  
57  
58  
59  
60



1  
2  
3  
4  
5  
6  
7  
8  
9  
10  
11  
12  
13  
14  
15  
16  
17  
18  
19  
20  
21  
22  
23  
24  
25  
26  
27  
28  
29  
30  
31  
32  
33  
34  
35  
36  
37  
38  
39  
40  
41  
42  
43  
44  
45  
46  
47  
48  
49  
50  
51  
52  
53  
54  
55  
56  
57  
58  
59  
60

For peer review only

**Figure Caption Sheet**

*Figure 1.* Satisfaction responses upon completion combined by survey type (n=482)

For peer review only

Table 1

*The ALSAA Inclusive Research Protocol*

| <b>Step</b>                                            | <b>Description of step and considerations</b>                                                                                                                                                                                                                                                                                                                                                                                                                                                                                                                                                                                                                                                                                                                                           |
|--------------------------------------------------------|-----------------------------------------------------------------------------------------------------------------------------------------------------------------------------------------------------------------------------------------------------------------------------------------------------------------------------------------------------------------------------------------------------------------------------------------------------------------------------------------------------------------------------------------------------------------------------------------------------------------------------------------------------------------------------------------------------------------------------------------------------------------------------------------|
| Step 1: Recruitment of advisors / peer-researchers     | Ensure recruitment is inclusive of all potential autistic individuals including adults with intellectual disability*, consider using multiple channels of recruitment (e.g., Autism associations, self-advocacy networks, carer networks, adult networks, local radio, social media and word of mouth). In Australia, seek support from the Autism CRC Research Academy**.                                                                                                                                                                                                                                                                                                                                                                                                              |
| Step 2: Building rapport                               | If an established relationship does not already exist between the autistic individual and researcher, the researcher should offer to meet the individual (either face-to-face, over video conference or phone call). Be mindful that some autistic individuals may prefer to communicate via text or email and not to meet in person and should not be required to.                                                                                                                                                                                                                                                                                                                                                                                                                     |
| Step 3: Clarify what will be expected from the advisor | Outline tasks autistic advisors or peer researchers will be asked to complete. Specify the frequency and timing of when they are likely to be contacted. For specific tasks clearly provide step-by-step instructions, flexible lead-time, timeframes for feedback, area of investigation, and broad aim of the study. Make information available in Easy English or plain language as appropriate. Specify the type and nature of advice sought. Clearly describe how and where their input will be used and why their input is being sought.                                                                                                                                                                                                                                          |
| Step 4: Ethics, confidentiality and acknowledgement    | Describe ethics of the project and expected confidentiality. As required, specify on individual documents that the document is confidential and not to be distributed without discussion with the researcher. Can the autistic individual opt out if they would like? Outline what will happen if they choose to withdraw, e.g., this will not affect their relationship with the research team, university or any other associated organisations. It is a voluntary process. Negotiate and make explicit how the autistic advisor or peer-researcher will be acknowledged. Consider how the autistic individual may be recognised in a manuscript or research output. This may include as a co-author, in the acknowledgements section, and/or in discussing methodology and findings. |
| Step 5: Identify preferred communication style         | Ask the autistic individual their preferred communication style for providing feedback (e.g., face-to-face, phone call, email, video, or a variety of techniques). Also, in what medium they would like to receive the results/findings e.g., academic writing style, easy English writing style, mostly graphs/pictures, mostly dot points, described in person, video, PowerPoint presentation, etc. Although not all mediums may be practical, it is important to identify the autistic advisor's preferred style and then work together to identify a medium of communication which will be understood and accessible by both the autistic advisor and the researcher.                                                                                                              |
| Step 6: The sensory environment                        | The researcher must provide an 'autism-friendly' environment on any occasion where the autistic advisor and the researcher may be meeting in person, see p. 12-15 in the <i>Autism CRC Inclusive Research Practice Guides and Checklists for Autism Research</i> <sup>56</sup> regarding creating autism-friendly environments.                                                                                                                                                                                                                                                                                                                                                                                                                                                         |
| Step 7: Involvement in                                 | Autistic advisors input is sought in regard to areas of investigation, questionnaire design and interpretation of results. The researcher will need to                                                                                                                                                                                                                                                                                                                                                                                                                                                                                                                                                                                                                                  |

|                                                                                                       |                                            |                                                                                                                                                                                                                                                                                                                                                                                                                                                                                                                                                                                                                                                                                                                                                                                                                                                                                                                                                                                                                                                                      |
|-------------------------------------------------------------------------------------------------------|--------------------------------------------|----------------------------------------------------------------------------------------------------------------------------------------------------------------------------------------------------------------------------------------------------------------------------------------------------------------------------------------------------------------------------------------------------------------------------------------------------------------------------------------------------------------------------------------------------------------------------------------------------------------------------------------------------------------------------------------------------------------------------------------------------------------------------------------------------------------------------------------------------------------------------------------------------------------------------------------------------------------------------------------------------------------------------------------------------------------------|
| 1<br>2<br>3<br>4<br>5<br>6<br>7<br>8<br>9<br>10<br>11<br>12<br>13<br>14<br>15<br>16<br>17<br>18<br>19 | methodological design / results / findings | consider that ranking of priority areas may be a difficult task for some advisors and employ other consensus decision making strategies. The researcher will need to present questionnaire design questions or quantitative or qualitative results in an understandable format, developing design issue summaries or results summaries in the medium preferred by the autistic advisor or peer-researcher. This means the researcher may need to make a number of decisions around data analysis and interpretation. Where possible, outline each of these decisions so the process is transparent and the autistic advisor can reflect on the decisions made by the researcher and whether these were appropriate in their view. Provide clear guidance on what advice is being sought, provide lead time, and the timeframe and process to follow for providing advice. How long should the advice be? In what format? Who will be reading it, who do they send the advice to? What are the researchers specifically looking for, what should the advice focus on? |
| 20<br>21<br>22<br>23                                                                                  | Step 8: Feedback                           | Once the researcher receives the advice from the autistic advisor, the researcher should provide a timeframe in which the autistic advisor will receive an update on what aspects of the advice was incorporated and the effect it had/didn't have on the methodology, findings, and/or interpretation.                                                                                                                                                                                                                                                                                                                                                                                                                                                                                                                                                                                                                                                                                                                                                              |
| 24<br>25<br>26<br>27<br>28<br>29                                                                      | Step 9: Final checks                       | Once the manuscript or research output has been further developed, the autistic advisor should receive a copy of the manuscript prior to submission. If the autistic advisor has limited experience with academic writing, the researcher should offer to describe/provide a lay summary of the overall article for the advisor.                                                                                                                                                                                                                                                                                                                                                                                                                                                                                                                                                                                                                                                                                                                                     |
| 30<br>31<br>32                                                                                        | Step 10: Acknowledgement                   | Autistic advisor or peer-researcher to be acknowledged in the agreed upon manner (e.g., co-author, thanked in the acknowledgement section, acknowledged during a presentation etc.)                                                                                                                                                                                                                                                                                                                                                                                                                                                                                                                                                                                                                                                                                                                                                                                                                                                                                  |

\*Although inclusive consultation occurred at time 1, the ALSAA RAN does not currently have an active member on the autism spectrum with an intellectual disability. Renewed efforts to recruit an advisor will be instigated when autism and intellectual disability focused outputs are commenced. We consult as needed with an advisor with intellectual disability not on the autism spectrum currently.

\*\*The Autism CRC Research Academy (<https://www.autismcrc.com.au/research-academy>) provides training for peer researchers.

Table 2

*Measurements included in the ALSAA surveys*

| Measure / domain                                                                                 | Self-report | Informant report | Carer |
|--------------------------------------------------------------------------------------------------|-------------|------------------|-------|
| Demographics and personal characteristics                                                        |             |                  |       |
| Basic demographics<br>(Age, Sex, Ethnicity, English speaking status)                             | ✓           | ✓                | ✓     |
| Other demographics<br>(Education, Occupation <sup>a</sup> , Family & living conditions, Income)  | ✓           | ✓                | ✓     |
| Autism Characteristics                                                                           |             |                  |       |
| The Autism Quotient - Short <sup>b</sup> (AQ-Short) <sup>67</sup>                                | ✓           | ✓                | ✓     |
| Repetitive Behaviours Questionnaire-2 Adult Version (RBQ-2A) <sup>63</sup>                       | ✓           | ✓                |       |
| The Glasgow Sensory Questionnaire <sup>95</sup>                                                  | ✓           | ✓                |       |
| The Intolerance of Uncertainty Scale-12 <sup>96</sup>                                            | ✓           |                  | ✓     |
| Health & Well-Being                                                                              |             |                  |       |
| Medical history                                                                                  | ✓           | ✓                | ✓     |
| Medication profile                                                                               | ✓           | ✓                |       |
| Smoking, alcohol and illicit drug use <sup>a</sup>                                               | ✓           | ✓                |       |
| The Patient Health Questionnaire-15 <sup>97</sup>                                                | ✓           |                  | ✓     |
| Medical Outcomes Study Short Form Health Survey-12 (SF-12) <sup>98</sup>                         | ✓           | ✓                | ✓     |
| The Composite Autonomic Symptom Score - 31 (COMPASS 31) <sup>99</sup>                            | ✓           |                  |       |
| Pittsburgh Sleep Quality Index <sup>100</sup>                                                    | ✓           |                  |       |
| Flinders Fatigue Scale <sup>101</sup>                                                            | ✓           |                  |       |
| Mental & Emotional Health                                                                        |             |                  |       |
| DSM-5 Dimensional Anxiety Scales: Generalized Anxiety Disorder-Adult (DSM5 GAD-A) <sup>102</sup> | ✓           |                  | ✓     |
| The Patient Health Questionnaire-9 (PHQ-9) <sup>61</sup>                                         | ✓           |                  | ✓     |
| The Warwick Edinburgh Mental Well-being Scale <sup>103</sup>                                     | ✓           |                  |       |
| The New General Self-Efficacy Scale <sup>104</sup>                                               | ✓           |                  |       |
| The Emotion Regulation Questionnaire <sup>105</sup>                                              | ✓           |                  | ✓     |
| Developmental Behaviour Checklist-Adolescent/Adult version (DBC-A) Revised <sup>106</sup>        |             | ✓                |       |
| The Brief COPE <sup>107</sup>                                                                    | ✓           |                  | ✓     |
| Memory Complaint Questionnaire (MAC-Q) <sup>108</sup>                                            | ✓           |                  |       |
| Relationships & Social Networks                                                                  |             |                  |       |
| UCLA Loneliness Scale-8 (ULS-8) <sup>109</sup>                                                   | ✓           |                  |       |
| Supports and networks <sup>a</sup>                                                               | ✓           | ✓                |       |
| The Social Support Questionnaire (SSQ) <sup>110</sup>                                            | ✓           |                  | ✓     |
| Activities, Participation & Quality of Life                                                      |             |                  |       |

|    |                                                                 |   |   |   |
|----|-----------------------------------------------------------------|---|---|---|
| 1  |                                                                 |   |   |   |
| 2  |                                                                 |   |   |   |
| 3  | WHOQOL-BREF <sup>111</sup>                                      | ✓ |   | ✓ |
| 4  | Waisman Activities of Daily Living Scale (W-ADL) <sup>112</sup> | ✓ | ✓ |   |
| 5  | World Health Organisation Disability Assessment Schedule        | ✓ | ✓ | ✓ |
| 6  | (WHO-DAS II) <sup>113</sup>                                     |   |   |   |
| 7  | Vocational Index for Adults with Autism <sup>114</sup>          | ✓ | ✓ |   |
| 8  | Special abilities and interests <sup>c</sup>                    | ✓ |   |   |
| 9  | Leisure activities participation                                | ✓ | ✓ |   |
| 10 | Leisure Satisfaction Scale (LSS) <sup>115</sup>                 | ✓ |   |   |
| 11 | Driving and transport                                           | ✓ | ✓ | ✓ |
| 12 | Service Usage                                                   |   |   |   |
| 13 | Client Service Receipt Inventory (CSRI) <sup>116</sup>          | ✓ | ✓ |   |
| 14 | Health service seeking behaviour                                | ✓ | ✓ |   |
| 15 | Early intervention service history                              | ✓ | ✓ |   |
| 16 | Justice system contact                                          | ✓ | ✓ |   |
| 17 | Preventative health screening                                   | ✓ | ✓ |   |
| 18 | Caring                                                          |   |   |   |
| 19 | Positive Affect Index <sup>117</sup>                            |   |   | ✓ |
| 20 | Caregiver Activity Survey (CAS-ID) <sup>118</sup>               |   |   | ✓ |
| 21 | Zarit Burden Interview <sup>119</sup>                           |   |   | ✓ |

<sup>a</sup> Based on questions from the National Health Survey of Mental Health and Wellbeing (Slade, Johnston, Oakley Browne, Andrews, & Whiteford, 2009). <sup>b</sup>A 28-item parent-carer report adaptation using items from the AQ-Adolescent (Baron-Cohen, Hoekstra, Knickmeyer, & Wheelwright, 2006) was used for the informant-report survey <sup>c</sup>Based on questions from the Interactive Autism Network (<https://iancommunity.org/>)

Table 3

*Recruitment statistics at close of Time 1 data gathering*

| Sample                              | Registered | Non-respondent | Ineligible (%) | Withdrawn (%) | Partial Completion (%) | Completed (%) |
|-------------------------------------|------------|----------------|----------------|---------------|------------------------|---------------|
| Self-report autistic adults         | 345        | 75 (22)        | 6 (2)          | 11 (3)        | 16 (5)                 | 237 (69)      |
| Self-report non-autistic adults     | 221        | 48 (22)        | 7 (3)          | 20 (9)        | 16 (7)                 | 130 (59)      |
| Carer                               | 185        | 48 (26)        | 22 (12)        | 13 (7)        | 2 (1)                  | 100 (54)      |
| Informant-report for autistic adult | 78         | 22 (28)        | 5 (6)          | 9 (11)        | 0 (0)                  | 42 (54)       |

Table 4

*Participant Characteristics*

| Characteristic                    | Autistic adults self-report formally diagnosed (N=221) | Autistic adults self-report no formal diagnosis (N=32) | Autistic adults informant-report (N=42) | Carers (N=102) | Non-autistic self-report (N=146) |
|-----------------------------------|--------------------------------------------------------|--------------------------------------------------------|-----------------------------------------|----------------|----------------------------------|
| Age mean (SD)                     | 41.8 (12.2)                                            | 44.2 (8.1)                                             | 32.5 (9.9)                              | 56.3 (11.2)    | 43.7 (13.5)                      |
| Gender (%)                        |                                                        |                                                        |                                         |                |                                  |
| Male                              | 86 (39)                                                | 14 (44)                                                | 34 (81)                                 | 16 (16)        | 29 (20)                          |
| Female                            | 124 (56)                                               | 17 (53)                                                | 8 (19)                                  | 85 (83)        | 117 (80)                         |
| Other                             | 11 (5)                                                 | 1 (3)                                                  | 0                                       | 1 (1)          | 0                                |
| <sup>a</sup> Ethnicity (%)        |                                                        |                                                        |                                         |                |                                  |
| Caucasian                         | 194 (88)                                               | 25 (78)                                                | 38 (90)                                 | 86 (89)        | 122 (85)                         |
| Other                             | 27 (12)                                                | 7 (22)                                                 | 4 (9)                                   | 11 (11)        | 22 (15)                          |
| Multilingual (%)                  | 26 (12)                                                | 5 (16)                                                 | 0                                       | 6 (6)          | 18 (12)                          |
| <sup>b</sup> SEIFA decile (SD)    | 6.18 (2.89)                                            | 5.74 (3.09)                                            | 6.58 (2.88)                             | 6.60 (2.78)    | 7.01 (2.60)                      |
| <sup>bc</sup> Rural / Remoteness  |                                                        |                                                        |                                         |                |                                  |
| Major City                        | 146 (71)                                               | 17 (55)                                                | 32 (84)                                 | 72 (73)        | 114 (83)                         |
| Inner Regional                    | 44 (21)                                                | 10 (32)                                                | 5 (13)                                  | 21 (21)        | 19 (14)                          |
| Outer Regional                    | 12 (6)                                                 | 4 (13)                                                 | 1 (3)                                   | 5 (5)          | 5 (4)                            |
| Remote / Very Remote              | 4 (2)                                                  | 0                                                      | 0                                       | 0              | 0                                |
| <sup>d</sup> Living situation (%) |                                                        |                                                        |                                         |                |                                  |
| Living alone                      | 58 (26)                                                | 9 (28)                                                 | 3 (7)                                   | 14 (14)        | 26 (18)                          |
| Living as couple                  | 95 (43)                                                | 18 (56)                                                | 4 (9)                                   | 74 (75)        | 105 (72)                         |
| Living with parents               | 31 (14)                                                | 0                                                      | 24 (57)                                 | 0              | 5 (3)                            |
| Living with other relatives       | 3 (1)                                                  | 0                                                      | 1 (2)                                   | 6 (6)          | 3 (2)                            |
| Living with others                | 20 (9)                                                 | 5 (16)                                                 | 8 (19)                                  | 4 (4)          | 5 (3)                            |
| Other                             | 14 (6)                                                 | 0                                                      | 2 (5)                                   | 1 (1)          | 2 (1)                            |
| <sup>e</sup> Marital Status (%)   |                                                        |                                                        |                                         |                |                                  |
| Single                            | 73 (33)                                                | 7 (22)                                                 | 36 (86)                                 | 4 (4)          | 22 (15)                          |
| Married                           | 66 (30)                                                | 12 (37)                                                | 4 (9)                                   | 65 (66)        | 90 (62)                          |
| De facto                          | 17 (8)                                                 | 3 (9)                                                  | 0                                       | 8 (8)          | 14 (9)                           |
| Never married                     | 8 (4)                                                  | 3 (9)                                                  | 2 (5)                                   | 2 (2)          | 3 (2)                            |
| Widowed                           | 1 (0)                                                  | 0                                                      | 0                                       | 3 (3)          | 2 (1)                            |
| Divorced now single               | 21 (9)                                                 | 3 (9)                                                  | 0                                       | 8 (8)          | 9 (6)                            |
| Divorced now remarried / de facto | 12 (5)                                                 | 2 (6)                                                  | 0                                       | 2 (2)          | 2 (1)                            |
| Separated                         | 7 (3)                                                  | 1 (3)                                                  | 0                                       | 2 (2)          | 1 (1)                            |
| Other                             | 16 (7)                                                 | 1 (3)                                                  | 0                                       | 4 (4)          | 3 (2)                            |
| Educational Status (%)            |                                                        |                                                        |                                         |                |                                  |



|                              |                           |                         |                         |                         |                           |
|------------------------------|---------------------------|-------------------------|-------------------------|-------------------------|---------------------------|
| Completed high school        | 163 (76)<br><i>n</i> =215 | 20 (64)<br><i>n</i> =31 | 21 (51)<br><i>n</i> =41 | 86 (88)<br><i>n</i> =98 | 120 (86)<br><i>n</i> =139 |
| Vocational education         | 61 (35)<br><i>n</i> =174  | 16 (57)<br><i>n</i> =28 | 4 (11)<br><i>n</i> =35  | 17 (17)<br><i>n</i> =98 | 20 (16)<br><i>n</i> =127  |
| University education         | 113 (65)<br><i>n</i> =174 | 12 (43)<br><i>n</i> =28 | 1 (3)<br><i>n</i> =35   | 59 (60)<br><i>n</i> =98 | 107 (84)<br><i>n</i> =127 |
| <sup>f</sup> Employment (%)  |                           |                         |                         |                         |                           |
| Open employment              | 116 (57)                  | 20 (69)                 | 6 (15)                  | 59 (60)                 | 104 (76)                  |
| Student / other day activity | 38 (19)                   | 3 (10)                  | 24 (60)                 | 3 (3)                   | 17 (12)                   |
| Retired, no volunteering     | 8 (4)                     | 2 (7)                   | 2 (5)                   | 19 (19)                 | 6 (4)                     |
| Homecare                     | 17 (8)                    | 3 (10)                  | 0                       | 9 (9)                   | 9 (6)                     |
| No activity                  | 22 (11)                   | 1 (3)                   | 8 (20)                  | 9 (9)                   | 1 (1)                     |

<sup>a</sup> Ethnicity: Carers, *n*=97; Non-autistic (self-report), *n*=144

<sup>b</sup> Autistic adults (diagnosis, self-report), *n*=209; Autistic adults (no diagnosis, self-report), *n*=31; Autistic adults (informant report), *n*=38; Carers, *n*=99; Non-autistic (self-report), *n*=138

<sup>c</sup> Australian population is 70% Major city, 18% Inner regional, 9% Outer regional, 1% Remote, 1% Very remote in the 2011 Census<sup>120</sup>

<sup>d</sup> Carers' Living situation: *n*=99

<sup>e</sup> Carers' Marital status: *n*=98

<sup>f</sup> Employment: Autistic adults (diagnosis, self-report), *n*=201; Autistic adults (no diagnosis, self-report), *n*=29; Autistic adults (informant report), *n*=40; Carers, *n*=99; Non-autistic (self-report), *n*=137

Table 5

*Diagnostic Characteristics*

| Characteristic                              | Autistic adults self-report formally diagnosed (N=221) | Autistic adults self-report no formal diagnosis (N=32) | Autistic adults informant-report (N=42) | Carers (N=102)                   | Non-autistic self-report (N=146) |
|---------------------------------------------|--------------------------------------------------------|--------------------------------------------------------|-----------------------------------------|----------------------------------|----------------------------------|
| AQ score mean (SD)                          | 87.6 (10.3)<br>n=210                                   | 83.7 (8.8)                                             | 84.2 (9.5)<br>n=36                      | 57.3 (13.8)<br>n=60 <sup>a</sup> | 55.1 (11.9)<br>n=137             |
| Above AQ Cutoff (%)                         | 203 (97)                                               | 31 (97)                                                | 35 (97)                                 | 18 (30)                          | 30 (22)                          |
| <sup>b</sup> Autism Diagnosis               |                                                        |                                                        |                                         |                                  |                                  |
| Autism spectrum disorder / condition        | 49 (22)                                                | -                                                      | 17 (40)                                 | -                                | -                                |
| Asperger's syndrome                         | 130 (59)                                               | -                                                      | 11 (26)                                 | -                                | -                                |
| Autistic disorder                           | 1 (0)                                                  | -                                                      | 6 (14)                                  | -                                | -                                |
| 'High-functioning' autism                   | 32 (14)                                                | -                                                      | 3 (7)                                   | -                                | -                                |
| PDD-NOS                                     | 1 (0)                                                  | -                                                      | 1 (2)                                   | -                                | -                                |
| Other                                       | 6 (3)                                                  | -                                                      | 2 (5)                                   | -                                | -                                |
| No formal diagnosis                         | -                                                      | 32 (100)                                               | 1 (2)                                   | -                                | -                                |
| Age at Diagnosis Mean (SD)                  | 35.3 (15.1)<br>n=217                                   | -                                                      | 10.01 (10.8)<br>n=38                    | -                                | -                                |
| Years since Diagnosis Mean (SD)             | 6.9 (8.3)<br>n=217                                     | -                                                      | 21.9 (9.8)<br>n=38                      | -                                | -                                |
| Intellectual Disability (%)                 | 10 (4)                                                 | 1 (3)                                                  | 33 (78)                                 | 1 (1)                            | 1 (1)                            |
| Other Developmental Disability (%)          | 6 (3)                                                  | 2 (6)                                                  | 9 (21)                                  | 0                                | 1 (1)                            |
| <sup>c</sup> Other Psychiatric Diagnosis(%) |                                                        |                                                        |                                         |                                  |                                  |
| Currently                                   | 148 (69)<br>n=213                                      | 13 (42)<br>n=31                                        | 22 (52)                                 | 38 (39)<br>n=100                 | 29 (21)<br>n=140                 |
| At any time                                 | 191 (89)<br>n=213                                      | 28 (90)<br>n=31                                        | 31 (74)                                 | 68 (68)<br>n=100                 | 67 (48)<br>n=140                 |
| Depression (PHQ-9) above cut-off (%)        | 103 (52)<br>n=199                                      | 15 (52)<br>n=29                                        | -                                       | 28 (29)<br>n=97                  | 15 (12)<br>n=126                 |
| Anxiety (DSM5 GAD-A) above cut-off (%)      | 115 (56)<br>n=206                                      | 14 (47)<br>n=32                                        | -                                       | 27 (27)<br>n=99                  | 14 (11)<br>n=130                 |

<sup>a</sup> Carers were asked to complete the AQ scale only if they were a biological relative of the adult with autism

<sup>b</sup> Autism diagnosis: Autistic adults (self-report, diagnosed),  $n=220$

<sup>c</sup> Recording of a psychiatric diagnosis apart from autism spectrum conditions or intellectual disability

For peer review only

1  
2  
3  
4  
5  
6  
7  
8  
9  
10  
11  
12  
13  
14  
15  
16  
17  
18  
19  
20  
21  
22  
23  
24  
25  
26  
27  
28  
29  
30  
31  
32  
33  
34  
35  
36  
37  
38  
39  
40  
41  
42  
43  
44  
45  
46  
47  
48  
49  
50  
51  
52  
53  
54  
55  
56  
57  
58  
59  
60

1  
2  
3  
4  
5  
6  
7  
8  
9  
10  
11  
12  
13  
14  
15  
16  
17  
18  
19  
20  
21  
22  
23  
24  
25  
26  
27  
28  
29  
30  
31  
32  
33  
34  
35  
36  
37  
38  
39  
40  
41  
42  
43  
44  
45  
46  
47  
48  
49  
50  
51  
52  
53  
54  
55  
56  
57  
58  
59  
60

For peer review only

Table 6

*Carer Characteristics (N=102)*

| Characteristic                                              | Frequency / Mean          |
|-------------------------------------------------------------|---------------------------|
| Relationship to autistic person (%)                         |                           |
| Mother                                                      | 42 (43, <i>n</i> =98)     |
| Father                                                      | 10 (10, <i>n</i> =98)     |
| Partner/spouse                                              | 23 (23, <i>n</i> =98)     |
| Sibling                                                     | 2 (2, <i>n</i> =98)       |
| Child                                                       | 1 (1, <i>n</i> =98)       |
| Carer – unspecified                                         | 17 (17, <i>n</i> =98)     |
| Other                                                       | 3 (3, <i>n</i> =98)       |
| Age of autistic adult cared for mean ( <i>SD</i> )          | 37.5 (13.2)               |
| Hours spent per week with autistic adult mean ( <i>SD</i> ) | 63.4 (57.8, <i>n</i> =92) |

1  
2  
3  
4  
5  
6  
7  
8  
9  
10  
11  
12  
13  
14  
15  
16  
17  
18  
19  
20  
21  
22  
23  
24  
25  
26  
27  
28  
29  
30  
31  
32  
33  
34  
35  
36  
37  
38  
39  
40  
41  
42  
43  
44  
45  
46  
47  
48  
49  
50  
51  
52  
53  
54  
55  
56  
57  
58  
59  
60

For peer review only

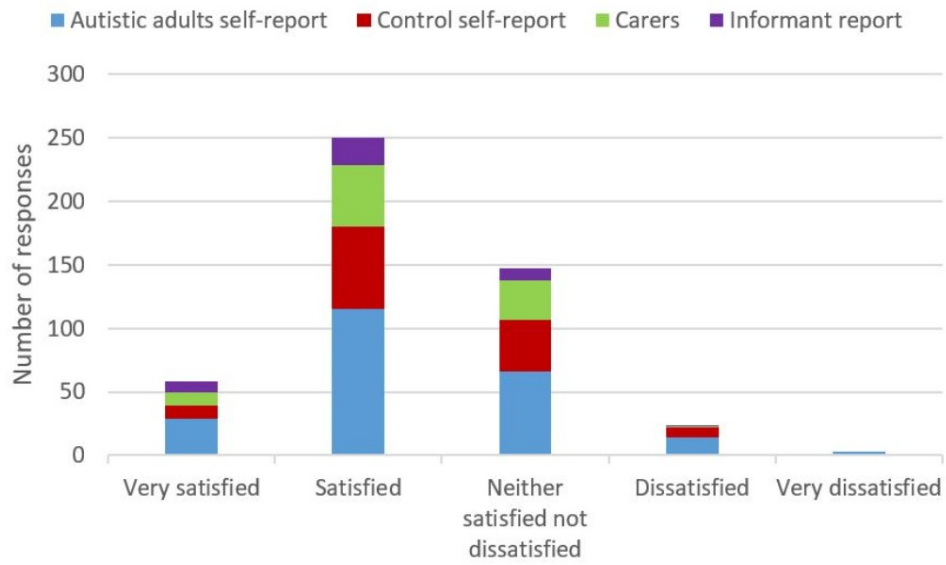

Figure 1. Satisfaction responses upon completion combined by survey type (n=482)

89x53mm (300 x 300 DPI)
